# Supplementary material for: Development of SNP-Based Genomic Tools for the Canadian Bison Industry: Parentage Verification and Subspecies Composition
Source: Front Genet. 2020 Nov 20;11:585999. doi: 10.3389/fgene.2020.585999 (PMC7714993; doi:10.3389/fgene.2020.585999)
Supplement: Supplementary file 2 [file Table_2.XLSX]

## Sheet: Legend
Supplemental Table 2	Parentage and subspecies-identification SNPs on the custom Affymetrix Axiom SNP panel
The SNP information has been archived in European Variation Archive (EVA). Accession #: PRJEB40501
Legend
Affy_SNP_ID	SNP ID assigned by Affymetrix
Chromosome	SNP location - Chromosome based on UMD3.1 assembly
Physical_Position	SNP location - Position based on UMD3.1 assembly
Selected_For	Indicating if the SNP was selected for parentage verification or subspecies composition
Flank	Flanking sequences
Ordered_Alleles	The two alleles for the SNP
Conversion_Score	The conversion score predicted by Affymetrix. Higher value implied better probability of successful genotyping

## Sheet: S1_panel_snps
Affy_SNP_ID	Chromosome	Physical_Position	Selected_For	Flank	Ordered_Alleles	Conversion_Score
Affx-961337321	1	202437	Subspecies	AGATGTTAAACTCAGATGTCCCGTGTCATCTGAGA[G/T]CAGGTACCTTTCTGGTGCCAAGAGATGTGTCCCTT	T // G	0.662
Affx-961337324	1	213749	Subspecies	ACTCCAGGGAGTTAGGAAACTGAACCCAGGACTTA[A/G]AGCCTGGCACAGGGGCTTCCTAACATTTTATTTTC	A // G	0.622
Affx-961337326	1	278829	Subspecies	TGCTCTTCCATGGCTCACAGTGATGTTTTAGACCC[A/G]TGTAAAGGTGATGCTAGCAGGGTGGTGGGAAGCTC	A // G	0.688
Affx-961021968	1	353177	Subspecies	TTCTCTTGCACTCTGGTCCTCAGCCCTGACTTGCC[A/G]TCTAAAAATATCCATCAAAGTCATATCTCTTAAGT	A // G	0.704
Affx-961021970	1	353647	Subspecies	GTTCTCCTCTTCTGCTGGAATCCTCTCTCCACTTT[C/G]CAGAAACAGCATGCTCTCTATAGATTTCCAGGGTC	C // G	0.662
Affx-961021972	1	359410	Subspecies	CCAACAAGACTGCAAAGATTTTGCAAATGTGATCC[C/T]GTCCCCTTGCTTTCTGGATTATGCCTCCTTGGCAG	T // C	0.654
Affx-961021974	1	364134	Subspecies	ACCACCAGGGAAGGAGGGTGAGGCTGTTTATTGTC[A/G]TCTTGTTGAATAACTAGGAGCCACTGCAGAGCAGA	A // G	0.732
Affx-961021975	1	366619	Subspecies	GCCAATAAGCAGATCCCTGTTTGAATCCAACAAAC[C/T]GGCAGACTGCTAGAGCAGCAATAATCAAAAGGAAA	T // C	0.646
Affx-961021978	1	372228	Subspecies	GACCTCTATTACAAAAAATATACTCAGTAGTTTCT[C/G]AATTTTGTAAAAAGTGTGTAAATTTGTTTTTTCCT	C // G	0.686
Affx-961021981	1	378910	Subspecies	CAGTGTAATATTTATGAGTCTCCCACGTTGTAATA[C/T]GTATCAGCACTCTGTTCCTTTTTATGGCCAACGAC	T // C	0.682
Affx-961021982	1	380433	Subspecies	GATAACTCTTAGTATTGACATGGGCTCAAATGTGT[A/G]CATGTATAAAGTTGGAATGTGACTAGTTCACAAGG	A // G	0.742
Affx-961021983	1	380838	Subspecies	AGCATTTCACCTGTCTTGGTAGCAAAAAGTTGACA[A/G]CATGTCCTCAATGCACTCTTGTTGACTGAAGGAGA	A // G	0.71
Affx-961021989	1	572286	Subspecies	TGAACCACCCAAATAAGGCAAAGTTAAAGCTTACC[C/T]TCCCCTCCCCCTTCCTTTGATTTCCCTCATCGCTC	T // C	0.712
Affx-961021990	1	583981	Subspecies	AAGTTTCAAGATTGTAGAATGACAGACCTTTCGCT[A/T]ATTCCCAGCAGGGAAACCAAGAACACAATGGCAAG	A // T	0.672
Affx-961021991	1	603344	Subspecies	ATGGCAACACCATGGAATACGGGTGCGGTAACAAA[C/T]TGTACCTTTAATCCAGGCCTCAATGCTAAATCCAA	T // C	0.734
Affx-961021995	1	681001	Subspecies	GGCCCTCAAACCACCCTCTGCGTGGAAAAGCCCCC[A/G]TTTCTTTTGATATCTACTGGGTCTCGTACATTTGA	A // G	0.736
Affx-961021996	1	689113	Subspecies	ACCTAACAAGAATGTAGCTCGGGAAAACATCAAAA[C/T]ACACTCTAACTTTGGCACGTCAAGGTCAAATGGCC	T // C	0.814
Affx-961022010	1	1320690	Parentage	AAATTACATGTTGAAATGATTTATTAATTTTGACA[C/T]CACTCTGGTCTTATACTGTTCCCAGAGGCCTTTTA	T // C	0.686
Affx-961022020	1	1756415	Subspecies	ACTATAATTGATACATCTGAATTATCTATGAGTGA[C/T]GACAGTACTGTTCTTAGTGGGAGCTGTTGTTTTAT	T // C	0.69
Affx-961022029	1	2016513	Subspecies	GCAGAACAGCAACATCTGAATTCTTCTTTCCAAAT[C/T]ATGTGCTTAACTGTAAAATACTCTCCTTTCTTATT	T // C	0.734
Affx-961022033	1	2056422	Subspecies	TTTTCCCCAAGAAGGAAAGACAACAATGTCTGAAC[A/G]ATTTTGAGCTAATAGAGGTGAATTCTCTTAGAAAG	A // G	0.708
Affx-961022037	1	2073304	Subspecies	TATTGTTTCTGCCTCCTGGCTGGCTACTGTGATCA[C/T]GTCACATGTCAGAAGTTTGAGGATTTTTATAAACA	T // C	0.65
Affx-961022046	1	2372316	Subspecies	ATCTAATGGCCATATTTTTCATGCATATTTTGGTA[A/C]TCTTGTTCAAACTAAGAGACCAACTTGGGTACATT	A // C	0.7
Affx-961022047	1	2372708	Subspecies	GGTAGCAACATCACTTACTGCTGGTGATGTTAACC[G/T]CGATCACTTAATTAAGGTAGTGGTTGTCATGTTTC	T // G	0.678
Affx-961022050	1	2377818	Subspecies	AAATTCTGTTGTGATTGAACTTATCAGGTGAGTCG[C/T]GTTCTCAGTGACACTGTAAATCTCTTAAGGGTAAG	T // C	0.626
Affx-961022052	1	2403169	Subspecies	TTTAAAAAATAAAAAAGAGAGAGATACAATTAGCA[C/T]GCACCTCAGAGAGTGTGTGGTAACTGCTTAGAGCA	T // C	0.634
Affx-961022055	1	2427646	Subspecies	AACATCCTTGTCTGGCTTTGAGATCAGGTAATAGC[A/G]GCCTGCAATGTGGGAGACCTGGGTTCAGTCCCTGG	A // G	0.676
Affx-961022057	1	2481637	Subspecies	CCATTAAATATAGTAAAAATGATGATTTCTCTTTT[C/T]TGTGTGTGCCCACAAGGCTTACAGGATTTTAGTTC	T // C	0.662
Affx-961022063	1	2636370	Subspecies	CTCTCTCACTGCCTTTATATTTTTTCAATCTATTA[G/T]TATTATTACTCTGGTTGCAGTGGGTCTTTGTTGCT	T // G	0.674
Affx-961022066	1	2638578	Subspecies	TCCAGCCCCAACTCCGCTTCCCAACCGCCACTGAC[A/G]TCAACAGTCATGATGTGCATTACTTACCAGCAAGG	A // G	0.708
Affx-961022067	1	2639755	Subspecies	TACAATAACCAAGACATGCAAAGTGACCAGACACA[C/T]GAATGGATAAAGATGAGGTGTCACACGTATATACA	T // C	0.72
Affx-961103140	1	3133215	Parentage	GCATTGTTTATTGATTTGAGATCTTTGTTCTTTTC[C/T]AGTGTGGTTATGTAAAACTATAAATTTCCCTCTAA	T // C	0.73
Affx-961103186	1	3836191	Parentage	CAGATGTTTTAGGTTTAATGTCTGTACTCTTACCT[A/G]GCATACCATTAGGTCTCTTTACATATGTCATGTGA	A // G	0.732
Affx-961103241	1	4275499	Parentage	TGAATCAGGAGGAACCACTTTATAACCACACCTGA[A/C]TCATCTCTATATTTGTGTCAATTTCAATATGGTCA	A // C	0.736
Affx-961022105	1	4433688	Subspecies	ATATTAAAAATTTCCCTTACTATTTGCTTTTTAAA[C/G]AGGTTTGGAACACTGATGTTTTAAATGTCCTCTTC	C // G	0.694
Affx-961103271	1	4530650	Parentage	AGAAAATAGACTAGAGTGAAAAGATTGAACAAATA[C/T]GTGATGATAATCATATTTACATTGATTCTGGACAT	T // C	0.764
Affx-961103272	1	4540505	Parentage	ATCTTATCCTTAGGCTGAAATCTTATGCTTATTAC[A/G]TGTGTTGTATACATTTTGAAGTCTTTGGGTTGATT	A // G	0.75
Affx-961022120	1	4990881	Subspecies	TACAATTGAGTTATGACATATATGTATTTAATTTA[C/T]ACAGATTCAACACTCAGACTTCAGCAAAATAATGA	T // C	0.69
Affx-961022127	1	5319938	Subspecies	ACCAATACAATGGTCATCTTAGTATGGAGGTGCAG[A/G]GATTGACATGATTAACAGGCTCCCAGGTGATGTTG	A // G	0.636
Affx-961022128	1	5327058	Subspecies	ACTTTGAAGACAGTACTAAAACAGAATGTAAAATA[C/T]TTAATACATTTTATTAGGTCAACTTAAGTGATATT	T // C	0.736
Affx-961103338	1	5346478	Parentage	TTACTTGCTTTTGTATTGAAAAATATGACTTTCAC[A/G]GTTCTAATGTGCTGGATGAACCTCGAGCCTATTAT	A // G	0.734
Affx-961022135	1	5499388	Subspecies	ACCATTAACCATCACTCTATAGTTCCTTGAAAAGT[A/T]ATGTTTTATACCAATTATAATGATCATTGCACTAT	A // T	0.66
Affx-961022137	1	5514059	Subspecies	GTTATCTGTCCTCAAGGAGCCTCAATTTTGTTCTG[A/C]AAATCTGATAAGCTCTCTCTCTTTATAAGATTTTT	A // C	0.628
Affx-961022138	1	5520496	Subspecies	GATTTTTAACCAACTTTTTGTCTGATTCTCTTTCA[A/G]CCATTCAATGGTTTAATTCCATTGCTTCATCTTTG	A // G	0.7
Affx-961022139	1	5530132	Subspecies	TCATGGAATAAAATCAGGACTGTGATTCAGTTTTC[C/G]GATTAAGTGTTGTACTACTAGTAAATTCTTCTCCC	C // G	0.734
Affx-961103368	1	5538425	Parentage	ACAATGTAAACCACCATAACAACAGGCTAAAATAA[A/G]AAAAGGCATATAATCAGATCAATTGATGCAGAAAA	A // G	0.736
Affx-961022141	1	5554031	Subspecies	CACACGGAGGCTGGAAACACAGGTTGAAACATATT[A/G]CAGAGAAAGCAAGAAATTAACCGTTCATTCCAGGA	A // G	0.712
Affx-961022142	1	5554301	Subspecies	GAGGATGGCCATTGCCAAGGCAAAGTCCACAAATA[C/T]TGGAGTCTAATTGGTTGTGAGAATCAAGATAGAAG	T // C	0.684
Affx-961022144	1	5587581	Subspecies	GATCAAAGCTTTACCATACCCTTAATCACATAATC[G/T]TGCCCCTCTTCTTCTGAAAATCAATGTGCAATTAC	T // G	0.738
Affx-961022148	1	5594079	Subspecies	TCTATTTTTGCCAGCTTATCTTTTTTGTTATCTTC[A/G]AATAGACAACTAACTCTAAAAGAATTTCTCAACAT	A // G	0.714
Affx-961022149	1	5594434	Subspecies	TAAAGGTACGTACTGAAAAATGACCATTGGAATTA[C/G]TATGACAGATGTCACTGATGGCCTTGATAAAAGGA	C // G	0.672
Affx-961022152	1	5596173	Subspecies	AAGAAATCCCAGGAGTGAGCAATATTCATTAAATA[A/G]CAATTATGAAAAGCTGTTTGCCTTTTGGAATGGCT	A // G	0.752
Affx-961022153	1	5599431	Subspecies	AGGATCCAGCATCGATATCATAATCCCTGGATGCT[C/T]AAGTACCATAAATGACCCTCCTAATGGGCAGATTC	T // C	0.692
Affx-961022163	1	5928615	Subspecies	AAAAACAAAAATTAAACTCTAGTATTCAGTAGCCA[A/G]AGAATCTGCACCCCTCCAGAATCATAAAGGGGTGC	A // G	0.668
Affx-961022164	1	5936092	Subspecies	CATGAGCAAAGAACATGACTAGGCAATTTACAAAA[C/G]CGGAAACTCAAGGGTTGACAAGAATATGAAAAGAT	C // G	0.69
Affx-961022165	1	5940024	Subspecies	ATATATTTTGAATATTAACTCCATTTACTCATTCC[A/T]TTGGTTTCCTTTTCATTTTGTTCATTGTTTCTTTT	A // T	0.62
Affx-961022169	1	5966907	Subspecies	TCAACCATTCATGAAATATAGTTTATCTCCTATAC[C/G]ACAAGTTAGCTTCAGGAGCCTTTCAAAAAAAAATG	C // G	0.706
Affx-961022170	1	5968589	Subspecies	TTTTCAAATTTAGACATCTTCTACAAAGCAAGAGG[A/G]CACATTTCCATGCCAGATGCCTTATCTCCCAGAAT	A // G	0.68
Affx-961103522	1	6257541	Parentage	TATGAATGATGAAAAACTCTATTGATGATCATGTC[A/G]TTGCCAAATCAAATTATCACCAAAAAATTATTTCT	A // G	0.758
Affx-961022186	1	6424499	Subspecies	GGTAGTGGGACAGATTTGAACCAAGGTCCATAGTT[A/T]TCACACTATTAACCTATAGAACTAGCCAACAAGCA	A // T	0.654
Affx-961103736	1	7743495	Parentage	TCTGTTAGCAGTTAGCATACAGTTCATAGTATTCC[G/T]TTACAAACCTTGTGTGGTGTCTGAAAATTCAGTAG	T // G	0.744
Affx-961022258	1	9276070	Parentage	AAATTACTAAAATAATTAATCTTAACTTAGATTTA[C/T]TAAGACAAATATATTGTCTCTTGAAATGTGGAAGA	T // C	0.718
Affx-961022266	1	9522093	Subspecies	GGCTAACGTTCAGAGGAGAACACGGGAGAGGAAAA[A/G]CCTCTTAAAGGGATGCTGCTGCTGCTGCTAAGTCA	A // G	0.688
Affx-961022267	1	9525217	Subspecies	AACCCCAAACTCTCAGCTTCTCCTGAGGAGAAAAG[C/G]GTTTAGACTCCACATTGAGATCCCAGACTTACAAG	C // G	0.752
Affx-961022268	1	9525288	Subspecies	CCTCCCCCGGAGGAATGATCCCCAAGTCCCCCACC[C/T]CTGATAGCCAGTAGGATTTTGCTCTATGAAGTCCC	T // C	0.66
Affx-961022269	1	9525382	Subspecies	AAATTATCAACAAGATACAGGAGAACTCACTGCAA[C/T]GCAGAGCGAGCAGACAGAAAGGCCCACCTCCCGGT	T // C	0.698
Affx-961022270	1	9526987	Subspecies	TCTTGTATATCCAAAGGAAACAAAATCAACATCTC[C/T]AAGAGACATCTGTTTTCCCGTGTACATTGCAGCAT	T // C	0.69
Affx-961022271	1	9528601	Subspecies	TCCATTGTATTTCAATGAAACTGGAAAATAAAACA[C/T]TTATTTACTGAGCTTTTGATATTGTGCAAGGCATG	T // C	0.644
Affx-961022272	1	9528835	Subspecies	AAATGTAATCATAAAGTACTATGATGATTCAGAAG[A/G]GAGAGAGATTACTTTGCTGGGGCACCCTGGGGGGA	A // G	0.718
Affx-961104013	1	10525100	Parentage	TCGAGCATTGTACCCACATACTTGAGAAGAAGACA[G/T]GAAATATTACATCAGACTCTTTTTATAGACAGCAC	T // G	0.768
Affx-961022294	1	10525157	Subspecies	TTTATAGACAGCACTGAATTGGTTTAATTAGTAAT[A/G]ATGATAGCTATGATAATAACAATAAAAGCAACACA	A // G	0.684
Affx-961104014	1	10534414	Parentage	AAAAAAATCTCAAATCAGATCAAGTGATCTGGAAA[A/G]GATATCATCTAATGGATGAAATTATTTATATGACC	A // G	0.73
Affx-961104024	1	10599699	Parentage	TCCACATTTGTTAAACTTTATAGGGTTTATATCAA[A/G]TGATGTGTAGGAATACAAAAATATTGAATATCTGT	A // G	0.734
Affx-961104143	1	11486160	Parentage	TATTAGAATTTTTACAGTGTTAGTCTCCTATTTTA[C/T]GATCTTTCATTACACTGGCCTTTCTTAACAATATC	T // C	0.746
Affx-961022335	1	12209160	Subspecies	ATTCTAAACACCAATGGGATGGTAGTAGGAGGTGA[A/G]GCCTTTGGGAGGGAACTGTTACACAAGGATGGAGT	A // G	0.634
Affx-961022336	1	12209209	Subspecies	AACTGTTACACAAGGATGGAGTACTTATGAATGAG[A/G]TTAGTGCCCTTATAAAGGAGTCCCAGGAGAACCCT	A // G	0.718
Affx-961022337	1	12209485	Subspecies	AGTTCCTCCCTTCAGTAGAGTCTATGTTCCATGGG[A/C]TAGATAAAATATCATCTATTGTTAATTTTGTTTTT	A // C	0.618
Affx-961022338	1	12209936	Subspecies	GTTAGACAGAATATGTAAAGTTCTTTTGATGATAA[C/T]TTTGAATGTGTGCTATACATCCTGAATTGAAACCC	T // C	0.726
Affx-961022339	1	12209984	Subspecies	CTATACATCCTGAATTGAAACCCTATTCTAGATAT[A/G]TTTTCTGTGTATCTCCAGAAGCTTCCTTTTCTCAT	A // G	0.708
Affx-961022342	1	12229211	Subspecies	CAGTCGCTCAGTCATGTCTTAGAACAATAGTAAAG[C/T]AATTAAATGCACTTTTCTATTTTATCAATATACCA	T // C	0.622
Affx-961022343	1	12235751	Subspecies	GCTCAGTCAGTAGACATTCCTAAAAAATCTGTCAT[C/T]TTCTCAAAGAGTAGAAGTAGGGCATAATGAAATAG	T // C	0.698
Affx-961022346	1	12262184	Subspecies	CTTATTTTTGGCTCATATAAAATCTAAAACCCATT[C/T]TCCTGATTATATTTTTGTTTCCTCCTAATTGTAAT	T // C	0.706
Affx-961022347	1	12264924	Subspecies	CATTCTATGTGGCCAATTAGCCCATGAAAACTATA[A/G]TAAAATATATCTTCTGGAGAATTACCAAATTATAA	A // G	0.782
Affx-961022348	1	12300840	Subspecies	AATGCTGACCATTTGTTAAAAGGTTTTCAATTGTG[A/G]TGCTGGAGAAGGCTTTTGAGAGTCCCTTGGACAGG	A // G	0.626
Affx-961022349	1	12303404	Subspecies	AGTTCTACAAGTGATCATGGATTCTGAAATGATCA[C/G]AGGGCTGTGTTCTTCACTGTGCTTTCAATATTAGA	C // G	0.616
Affx-961022352	1	12319053	Subspecies	TATTAGAATGAAAATAAAAGAAAAATTAGATAAAT[G/T]ACAGAATTGAAAGACAAAAGTCTAAAAGTCTTATA	T // G	0.604
Affx-961022353	1	12323308	Subspecies	ACACAGTTGAGTAGCTTCTTTTAGCAAGAATTTCA[A/G]TTCTTTTAGTGGAACTGTCAGCCTCTCAATTTTGT	A // G	0.746
Affx-961022354	1	12336421	Subspecies	CTGTTTGGTGTTTATTCCTAAGGCATCAGAATTGC[C/T]TAGCTATATGATATGTGAGTGTTTAAATATTATAT	T // C	0.704
Affx-961022355	1	12357576	Subspecies	GCAACCTAAAAGTCCATAGACAGATGAATGCATAA[A/G]AAAGAGATGGCTTATGTATAAGGATTGTTGTTGTT	A // G	0.68
Affx-961022369	1	12853483	Subspecies	TATGTATGCATGAATATCCTCAGCTTCTGAATGCT[A/G]ATTCATACAACACAGCATAATTATACAATCAAAGA	A // G	0.734
Affx-961022370	1	12859722	Subspecies	GATAACCAGATAAACATTTACTGTGTCATAAAATA[A/T]TCATTATTAAAAGGTTTATTATTAATTTACCACTA	A // T	0.714
Affx-961022372	1	12865291	Subspecies	ACAGGAGGTGAAAGAAAAATCCACAATAATATTAT[C/T]TTCCAGTGATTACAAAGCACTATGCCTTCCACAAA	T // C	0.688
Affx-961022374	1	12910103	Subspecies	ATCTGAAAAAATGTAGAGATTTGATTCATTATAAT[C/T]AACAATAAATCAAATTTTTGTCACTTAAGAAACAA	T // C	0.606
Affx-961022384	1	13375551	Subspecies	AGGAAGTACAAGTGGAGAAGAGTAATTAGAAAACT[C/T]AGTAAGCTGTGATTCAAACTAGCTAATGTTTTTAA	T // C	0.706
Affx-961104319	1	13442565	Parentage	TTGGTATTTCCTATCTAATAACAGGATGATTTTTC[A/C]TGAGGAAGAAAGTATTGTCATGTGAAAAAAAGCCA	A // C	0.73
Affx-961104320	1	13445883	Parentage	ATATATCAGTTATTTGTTATATGAAAGTGAAGACC[A/G]TATTTAAACAGTGCTGAACTATCAGCAAAATAGTT	A // G	0.73
Affx-961104326	1	13462124	Parentage	CTGTACCTACTGAGCCACCTGGGAAGCTCTGTCTT[A/G]TAAAACAATCAATGTGGAAAACTCAATCTTGTTTC	A // G	0.744
Affx-961022386	1	13545680	Subspecies	ACTGAGTGACTGAACTGAATGGAACTGAACTCTTG[A/G]CTCTTTCAACTCACCCTCTTGACCCCTTCTTTCCA	A // G	0.626
Affx-961022387	1	13611128	Subspecies	AAGCAAAATAATATAGATCAATGTTAAAATGTTAA[C/T]TGTCATTTCTCAAATTCAAATTCCATTGTGTAATA	T // C	0.68
Affx-961022390	1	13778429	Parentage	AAAATTTGTATCCATTAAGGTTGCTCTTTGGACTA[C/T]GAAGTTCTTTTGTTTTGTAAAAAGCTTACCATTTT	T // C	0.73
Affx-961104364	1	14243881	Parentage	TAGATTCTTTACCACTGGGAAGCCCATCTAATATT[A/C]TATCCATATCCAAATTTCTCTAATTATTCAGTATT	A // C	0.742
Affx-961104366	1	14244952	Parentage	GACATATCATTCATTTTGCTTCTTCATAATTGTTT[C/T]CTATTTGCATATAAGAATCTTTGTTACTTCTTTTT	T // C	0.752
Affx-961022407	1	14949477	Subspecies	ACAACACATTGCTATTAACAGCATCACTTTTACCA[C/G]CCATACAGCACAAAGTAGAAGACTACTTGGCAATG	C // G	0.758
Affx-961104439	1	15610842	Parentage	AAAAGCATACCTACTAAGAAAACATATTATTCCTA[C/T]TGCTGAATGGAATATGAATGGTTTACTAATAACTG	T // C	0.75
Affx-961104442	1	15716874	Parentage	TCCTGGCTTGAACAACTGACCCTACTATCTGAAAT[A/G]ATAAACAAAAGATGTAAAGCAAATTTGAGGCAGAG	A // G	0.762
Affx-961022437	1	16259602	Subspecies	TGTGGGACAATGACAAAAAGTAACATGCACATAAT[C/G]GGAACACAGGAAAGAGAAGAAAGATAAAAGAAGAG	C // G	0.704
Affx-961022441	1	16725350	Subspecies	ATCTGGCATCTTTAGCAATATGCCATCCCACCCCA[A/C]TGCTATGTCGACACTTTTTCTGTGCACCCAATCTG	A // C	0.674
Affx-961104523	1	17502110	Parentage	TTATCACATGTATACATTTTATAGTCACCACCATT[C/T]AAGACATTTTATTTCCTATAAATGTAGCATGGCTC	T // C	0.74
Affx-961104525	1	17512964	Parentage	CTAGATATCCAATTGCATTTTTAAAAATAAAACAC[G/T]GTCTATTTCTTATCATTCAATACTAATTATGTCTA	T // G	0.752
Affx-961104533	1	17729707	Parentage	TGTGTATACACACACACGTATATACACACATGCAT[A/G]TATATGACTTCCTGTGCAGCAAGTTTCAACCACTG	A // G	0.772
Affx-961022455	1	17933858	Subspecies	TTGTTAAAAACATGTCATGCATTTAAGAGCTTTTC[A/G]GGCCAGTTTCTAGCTTAGTATTTATGCTGTAGAGG	A // G	0.694
Affx-961022456	1	17938070	Subspecies	AGGCAGCTAAGTTTCTAAGAACTAGGAGTGGATCT[A/C]GATTTTTAACTGTGTGGATCATAGCAAACCATCAG	A // C	0.646
Affx-961022457	1	17939266	Subspecies	GTACCTGTTTTCTAGTACCTGACCCAGTTCAGCAA[C/T]TGGAGACCCCTGAATGGCTTCTTAAGGCATTTCAA	T // C	0.694
Affx-961022459	1	18034562	Subspecies	GGATTTCAATGACATATTTTATCACAAATGCAAAC[C/T]CTAAATAGAATTAATTTACCCTAAACCAGGCATGG	T // C	0.688
Affx-961022461	1	18117481	Subspecies	AATCATTCCTAATAAAATGAATTTAACTGAAAATG[A/G]TATCAATTAGGCAAGTAAAAGTATTTCAAGAAATA	A // G	0.688
Affx-961022462	1	18135002	Subspecies	ATATCTGGATACAACTACTACATCTATGAGCTCAC[C/T]TAATATAATGAGAAGAATAACAATGATTAATGACT	T // C	0.688
Affx-961022466	1	18187348	Subspecies	GCTCCTTGGATAGAAACGTACGACAAACCTAGATA[A/G]CATTTTAAAATGCAGAGACATCACTCTTGAGAGTC	A // G	0.734
Affx-961022469	1	18251135	Subspecies	TTTTTATTTATAAAATGATACTAGATATAAATTTT[A/C]TGTTATGTTAATTCCTTTGCATTTGTGAGTATTTA	A // C	0.616
Affx-961022471	1	18294842	Subspecies	TATATTCCCAGTGTTTGGTGCAGATCTGAGTAAAT[A/G]GTAAGTGCTCAACCTATATTTCTTAAAATTATTGA	A // G	0.718
Affx-961022472	1	18294991	Subspecies	TCTGTTTAGGAATATATTGAGATTAAAGCAACACT[A/G]GGATCCCTAAGGGAAAAATTTTGATAGAGATTTGG	A // G	0.726
Affx-961022474	1	18304262	Subspecies	ACAGCTCTACAAATATTAACTATAATTAATGTCTG[G/T]CTGCCCATATGTTATATGTGTGTCCATATATGGAT	T // G	0.658
Affx-961022476	1	18336407	Subspecies	GAATAGCACTTAACCTAGTATAAAAACTTTAATGC[G/T]AAGAAATAATCCCTTTGTGTTACTTACATATAATT	T // G	0.736
Affx-961022478	1	18363999	Subspecies	GTGTTCCATGATTTAGCTAACCTCAGTGGTCTTAT[A/G]TTTTGCCACAAGTTTTCTCTGAAACCTCAAAGAGC	A // G	0.646
Affx-961022482	1	18406667	Subspecies	TAAAACTATTTTTTTCAAAGATAAAACAAAAGTGA[A/C]AAAACTTTAATGAGACTAAGAAAGAAGACTCAAAT	A // C	0.638
Affx-961022484	1	18433550	Subspecies	CAGCACAGCACTCCAGGTTCTGCCCAGTGGGAAGA[C/T]TTTCATTTTCCTTCAAAGCAAACCCTGCAGTCAGC	T // C	0.726
Affx-961022485	1	18450042	Subspecies	TATTTTACCCTATGCATGGATTTTTTATTCCTTCC[C/T]GAATTTAGTTTAGGTAAACATTTCTTAGTCTCTTA	T // C	0.702
Affx-961022486	1	18450558	Subspecies	AATAGCTTTATTTTCAGTGTTTTGAATTTATTCTC[A/C]CTGAAATAGCTTACCACTATCAAATTTCATGTTAT	A // C	0.694
Affx-961022487	1	18451363	Subspecies	AGGCAAGAACAGTGTGTCATTTTGAATTACATTTT[G/T]CTCAAGGTATGTGCCAAATACTAGGATTGCTGGGT	T // G	0.716
Affx-961022490	1	18454369	Subspecies	TGTTTATTATATAAAATATAGGCATGTATAATTTT[A/C]TACTGAATGAAATAACAATGTATATTCCAAAAATA	A // C	0.816
Affx-961022491	1	18456000	Subspecies	CAGCTATTTAAAGAAGTTTGTTCTTGACATAAATT[A/G]TACCAGTGTTTTCTTAGGTCAGTCTCCCAGAGAAA	A // G	0.606
Affx-961022492	1	18471666	Subspecies	CCTAACAAAGAAATAGACAGATGTAGTCAAATAGA[C/T]TTTCTATTTTTCTCCAGAAACATGCTGTTATTGAC	T // C	0.764
Affx-961022493	1	18499781	Subspecies	TTATGTCATTGTTTTCATCATAAATTGTTGGCTAT[A/C]AAGAGAAGCAGCATGAGTAAGAAGGAACATAATAG	A // C	0.714
Affx-961022495	1	18502787	Subspecies	CGAGTCAGGATTCCAACACCATCCCTCTCTCTCCA[C/T]AGGCCACCCTTGCAATTGAGTCAAGATTATGCCTC	T // C	0.634
Affx-961022496	1	18503921	Subspecies	TGCTCCTTTATGAGCCATTTTTAAATATGTTATTT[C/T]ATAGGCAAAAATAAATAGGGCTCCTTAACATATAA	T // C	0.67
Affx-961022497	1	18505834	Subspecies	CACACAATATTCCCTTGTATGCAGACTTTTAGCTG[A/T]ATATTATTTTAAATTAGACATCTTTGAACTAACCT	A // T	0.61
Affx-961022498	1	18506244	Subspecies	CAGGAGGGATCAATTGTTAACATCACATGAAGAAA[G/T]TAAGAAAGTGAAGACAGAGAAGCAACAGGTGTACC	T // G	0.652
Affx-961022499	1	18506473	Subspecies	AAGTGTGTGTTTGCATGGGGTATGTGTTCTGGGTC[C/T]ATTTAATGCTTATTTCTGTTGGTGAGAGAAAGTGA	T // C	0.66
Affx-961022501	1	18508395	Subspecies	CCACCAGAATTAGTATTTAACACTGAGACTTAAAA[C/G]TCTTTAACTGTCCATGAGTCTATGTCCCTCCCCTA	C // G	0.726
Affx-961022502	1	18510266	Subspecies	AGCAACAAGTGCTACTACTTCATTGTCAGCTCCAG[C/T]TGGAGCTCCTTCATGCACTGGGAAGCTCCCATCTT	T // C	0.66
Affx-961022503	1	18510422	Subspecies	CAGCATGATGATTTGACTTAAATATAATGTAAAAT[G/T]ATTACCATCAGTTACATCCTTCTTCTCAGACAGAT	T // G	0.742
Affx-961022504	1	18511636	Subspecies	CCAGGTGTCAGGGTACATTGATTTGCTCCACTAAG[A/G]AGACCACATTTGAAACAGCAGCTGTGATTGAAGTA	A // G	0.752
Affx-961022509	1	18514954	Subspecies	TTTCACTTTCATGTCATATTCCACTTATTTCCACT[C/T]CTGATAATAATTTCTGGATTCTTGGTTATGAACAA	T // C	0.71
Affx-961022510	1	18515007	Subspecies	ATTCTTGGTTATGAACAAGATCTTACTCTGGGGAG[C/T]GGGCAAGATAGCAGAGTAGTAGGACCCTGGGCTCA	T // C	0.64
Affx-961022511	1	18516125	Subspecies	TCTACTGAATACATACAAATAGATACAAAGAATTA[A/G]GCAAAATGATGTTGCAAAGGAATATGTTTCAAACA	A // G	0.7
Affx-961022512	1	18516165	Subspecies	AATGATGTTGCAAAGGAATATGTTTCAAACAAAGG[A/G]AAAAGGTAAAACTCTAGAAGAACTAAGCATATTGG	A // G	0.676
Affx-961022513	1	18516463	Subspecies	TAGTGGAAATTCACCCAAGCCATGAGAAAAGAAAA[C/T]GAAGATTAAAAAATGAGGACACTTTGAGACCTCTG	T // C	0.666
Affx-961022514	1	18517770	Subspecies	TATCTGTCAAATAATTAAATATAAATGGACTAAAT[G/T]TTCCAATCAAAGAAATAGAATGGCTAAATGGATAC	T // G	0.668
Affx-961022517	1	18518762	Subspecies	TTTAAGTGCACATAGAACATTATACAGGATATATA[C/T]CACATGCAACAACAAAAGAAGTCTCAATAAAATTG	T // C	0.636
Affx-961022518	1	18518929	Subspecies	ATGTGGAGGCTAAATATTATGCTACCAGCCAACCA[A/G]TGGGTCATTGAGGAAATCAAAGAAGAAATAAAAGA	A // G	0.688
Affx-961022519	1	18519798	Subspecies	GAGAATTAATGAAACTAAGAGCTGTTTTTTTGGAA[G/T]GATAAACAAAATGATAAGTGTTTAGACAGATTCAT	T // G	0.672
Affx-961022520	1	18520537	Subspecies	CAACATCCATTTATCATAAAAACTCTCAACAAAGT[A/G]GATATAAAGGGAATATGCCCTAATATAATAAAGCC	A // G	0.718
Affx-961022522	1	18523176	Subspecies	TCTACTACATGGGAAGAGTTTCAAATTCAAGATAA[C/T]CATAAATAAACAAATACAAAGACCTAGCTAGATTT	T // C	0.714
Affx-961022530	1	18770168	Subspecies	GCACATCCAGTTCACTGATCAACTATCAAACTGAA[G/T]GATAGCTTGTCATTACATCCGCAGTGAGTCAGTTG	T // G	0.714
Affx-961022531	1	18771770	Subspecies	CTAGCAACCTTATCTCAGCCAAAATGTCTGATCAA[C/G]TCTCTTTGCCTCATAATTTCCCAACTCCATTTTCA	C // G	0.778
Affx-961022532	1	18772632	Subspecies	TTTCTACCAAAGAGTAAAGCACAAAACTTGGTAGT[G/T]TCTCTGCTTGTTTCAATATCTCTGCTTCCTTTAGT	T // G	0.692
Affx-961022534	1	18796824	Subspecies	AACCTAATTAAACTCCATACACTTCTTTTTTTGAC[G/T]TTTGACTTTGTCTTGGGGTATAGCCAATTACCAAT	T // G	0.664
Affx-961022535	1	18797345	Subspecies	ATGAGTAAATCATAAATATGAATAGCATTGGAAGC[C/T]CAGACAATTCCAATTTTTCCCAAATCATCATCCAC	T // C	0.71
Affx-961022538	1	18835244	Subspecies	AGTGTGGGCTCTTGTTTCTGAAGCCTGGATTTCAA[C/T]TGACTTCTTACTCCTCTAACACAAGAAGACTGCCT	T // C	0.666
Affx-961022540	1	18846003	Subspecies	ACCCCAGGGATCAATGAACATATGAAGTGGCCTGA[C/T]CTAATAAACACCCTAAGAATTGGCCAGGTGGCATT	T // C	0.674
Affx-961022541	1	18847199	Subspecies	AGAAAGGTGGTAAGTGATACTCCCTCTAACTACTG[A/G]AGACCTCTGATGAAGTTCAAAATTACCTGATATTC	A // G	0.706
Affx-961022543	1	18879346	Subspecies	GTCAGGTGAACATCTCGGGCCCCACTTTAGACTAT[C/T]GAGGCAGAATCTGTAGTTCAATAAAATGCCCAGGT	T // C	0.65
Affx-961104618	1	19688497	Parentage	TTCTTAAACTCCAAATTTGTACGTACACCTATCTA[C/T]TCAACATATCTACCTGAATGCTTTAAAGCTATCTC	T // C	0.794
Affx-961022559	1	19705231	Subspecies	GAATTCCATGGATGGAAGCACCTAGAGAATTACAG[C/T]CCATGAAGCTGCAAAGAGTTGGACACTACTGAGCA	T // C	0.658
Affx-961022563	1	19728427	Subspecies	GCCTGGAGAATTCCATGGGTAGAGGAACCTGGAAG[G/T]CTACAATCAGTGGAGTCTTAAAGAGCCAAATATGA	T // G	0.678
Affx-961022564	1	19729894	Subspecies	AGAGGTACTCAAACTGGAAGTGGGTGGTAAAAAAC[C/G]GCCTGACCACCAAAGAATGGCTTCCAAATCCACAT	C // G	0.636
Affx-961022565	1	19731088	Subspecies	AAAGCTTCTGAAGGTCTTCAAGCACACAGTATTGC[A/T]TTGTAGGGTCATCAATGAGAGATGGTGAGGGTTGA	A // T	0.692
Affx-961022567	1	19748599	Subspecies	AAAGCAGGACTATACATATTATTGCTACTAGAAAA[A/G]AAATCAATAGAAATAGCCAGATCTGACAGAAATGA	A // G	0.718
Affx-961022568	1	19751553	Subspecies	GCCTAAATCTCCATGATATTCATTGATGACTCTGA[C/T]TACAAAATTAAGAATTTCTGTCACAAAAGCCTCTA	T // C	0.712
Affx-961022574	1	20288623	Subspecies	TAGGTATAGATTATTATTTTTCCTATAAGGAAAGA[A/C]AGGCCCAGAGAGGGTAAAGAATGTACCCAATGTCA	A // C	0.622
Affx-961022576	1	20313189	Subspecies	AATGATTACCACAATGCTTACTTAATATTCATCAC[C/T]TCATGTATTTAACAATTTTTTTCTTGTAATGAGAA	T // C	0.676
Affx-961022580	1	20410377	Parentage	ATTCCACTGAAGAATGCATGTATTAAGTGAATTCA[A/G]TGTTTCAACAAGCAGAATAGGAAGTAGTATGGCCA	A // G	0.69
Affx-961022585	1	20767417	Subspecies	ATACAAACTGTAATAACTGAATAGAGCTCAAGATA[G/T]ATATGTTCCCTGCTTCTCAAAGTGACCTAAGATGT	T // G	0.656
Affx-961022587	1	20883178	Subspecies	CCACTGCACTGTCCTACATTATTGCACAGAATTTT[C/T]CAAGTCAAGTTGGCATATTTGCTTTCCTACAACAG	T // C	0.7
Affx-961104648	1	20883976	Parentage	TTCAAGAACATAAAGGAAAGATCCAGAGAAAGAAT[A/G]AAGATTCAAGTGAGAAAAAGGATGACCCATAGACC	A // G	0.744
Affx-961022588	1	20911402	Subspecies	CACCACCATAATATAACGTGTTGAGGCCTGCTGCT[C/T]GGTACATTCATGTTCATTATCTCAGTTAAGGGTAA	T // C	0.644
Affx-961022590	1	20935438	Subspecies	TACCCAGAAATACAGGTTCCATTTCCTAAAGTAAA[G/T]AAATAAAAACAAAAATAAACAATGGGGCCCAATTG	T // G	0.69
Affx-961022592	1	20974607	Subspecies	CTTATTAATTTTTAAAATAATTACTTGCATTTTAT[A/C]TTCTTTAAAATTGCAGATACAACTTTCCAGAACCA	A // C	0.622
Affx-961022600	1	21374223	Subspecies	TCTATCATTAGCTTAAATATATGTGGGAGACAATT[G/T]AACTCCACTAAAGAGGACAAGGGTCAAAGTACTGA	T // G	0.692
Affx-961022601	1	21486158	Subspecies	ATTGTAGGATCAGTTCAGACTTTCTCAGGCACAAA[A/T]ACTCAAGTTCCAAAATTGTACCCATCCTTATGGAC	A // T	0.642
Affx-961022603	1	21555628	Subspecies	AATGACCATCTTTTAACATCTCTGTTTATATATAC[A/G]TACTATATGCATGGGTGTTAAGTCACTTCAGTCGT	A // G	0.672
Affx-961022604	1	21558982	Subspecies	TTGATACAAAACTGTATTGTCTACTAAGGAGAGGT[A/C]GTCAGCTTCTAGTCTAAGTCTCATCTCCATTAAAA	A // C	0.726
Affx-961022609	1	21824907	Parentage	ACTGAACTGAACTGAACTCAGTTGGATAGTTGGTC[A/G]CTTCTTAGTGCAAATCCAGCAAATGGAAAACTAGA	A // G	0.71
Affx-961022611	1	21856615	Subspecies	AGCTTGGTTTCAGTTGGTGAAGCTTGGTTTCAAGC[C/T]TCAGTTGGTGGAACTTGGTTTCAGTGTAGGTATGG	T // C	0.622
Affx-961104695	1	22115129	Parentage	CAATCACCTCAGAAAGATAAGAGAATATATTCCAT[G/T]TATTTAGTTAGTTCTTAGTGTTTAGTATATGCCAG	T // G	0.73
Affx-961022617	1	22222604	Subspecies	CCCAGTTCCTGGTTCTGAAGTTCATCTTCTTAAAC[A/G]TGTAAACTAATACTTTTCCAGACTCAGAGCCAGCA	A // G	0.67
Affx-961022619	1	22331207	Subspecies	GAAGGGGTGTTAAAACAGACTCATTCAGAGGTCAC[A/G]TGGGAGTATCAATGGGCAGTATTGGTTGTGGATTT	A // G	0.674
Affx-961022620	1	22342482	Subspecies	GGACATAGGAACTTGAGACACGCTAAATTTTAAGT[C/G]ATTTGATATATGAAATATCAAACTGACCTCTAGAA	C // G	0.74
Affx-961104709	1	22619403	Parentage	AGCTCACTGAGGGAATAGGAAGGAAAAAAGAGTAA[C/T]TGAAAAATCCTTGACATGTTTGCTTGATCTCTATT	T // C	0.742
Affx-961022631	1	22982481	Parentage	GAGAATATCCAAATATGGAAGGAGATTTGTAGTTT[A/G]GTAAGAATAGTAGGAACTTCTCAGGGTTCTAGATT	A // G	0.666
Affx-961104756	1	23149614	Parentage	TTATAAATGGGTTGAGAAAAATATTAGGTCAGTGA[A/G]TTGGGAGATATCGAGATATGTTAATAGCAGTGACT	A // G	0.75
Affx-961022635	1	23165805	Subspecies	AAATAGATCAATGCAACAGATGGAGAGCTCAGAAA[C/T]AGACCAATGCATATCTGGGTAATTAATTTTGACCA	T // C	0.708
Affx-961022644	1	23591900	Subspecies	TACTTGAGGTGAAAAGTTATCTAAATAAGTGAATC[A/G]TCAAAATTTAATAAAATGAAATTTTAATTGAAATT	A // G	0.682
Affx-961104766	1	23625917	Parentage	CGGTTCTGCTTGAAGGTCTGGTTTCTTGGTATCTG[A/G]GTGATTTTAATTAGTCTTTGAAGTTTCTTTTGAAA	A // G	0.73
Affx-961104769	1	23671635	Parentage	GTTGAATATCTCAATTTATTGATGGCTTTTGGCAT[A/G]TGCTACAGAACTAAAACCTTTATGAAATAAAACTA	A // G	0.73
Affx-961022650	1	23918471	Subspecies	CTTTGTGGAAGAAAAGAAGATGATTCTAGGTTAAC[A/G]TACAGCATCCTCTCTGCCACCATGATGGAGATTCA	A // G	0.624
Affx-961022651	1	23918542	Subspecies	ATAGTACATTCCAGCACCATAAATGTTGGAAACCA[C/G]TTAAGATGTACACTGTACCAAGTTCTTTAAAACCA	C // G	0.708
Affx-961022653	1	23920836	Subspecies	TGCTAAAATTCAATTATACAAAAAACCCAGATTGG[A/T]GCAGATGGACTTGAAATAGTTTGGCAAAAAATCAA	A // T	0.674
Affx-961022656	1	24019943	Subspecies	AAAGAAATAAGTCAATGAAGTTGATGTAGCAATCT[A/G]ATACCTTTGCTTTGATAACCTAAAAGGATGCAGAC	A // G	0.714
Affx-961022657	1	24020152	Subspecies	TTGATAGTTGTAAGTTGGTAATAAAATTTTAAATG[C/T]GGAATCGCTACACAAAATATGGAAGGAAATTTTGC	T // C	0.656
Affx-961022658	1	24024164	Subspecies	TTGGTGAAATAAATACTAATTTTGTGAATAATGGT[A/G]CATTTACCTTTATTTTTGTTCCATCTATTAGTCAT	A // G	0.692
Affx-961022659	1	24025138	Subspecies	ATAGACTTTCCTTCACCATAATTATAACCTTTAAA[A/C]ATTTACCAGTATTTTAGTATATAATATTTTTATGA	A // C	0.648
Affx-961022660	1	24031296	Subspecies	TCAGAGACATAGCATGGTGAAGAAAAGTGGTTCTT[A/G]TGAGAAAATAAAGTTTTTCTCACTGAATCTTTCCT	A // G	0.64
Affx-961022661	1	24034170	Subspecies	ATAGCTCAACATATTCAAAATGATTTCTCTTAGAG[C/T]TGGACAGTCCCTGCAGTGACTTTACGGGGAAGCGC	T // C	0.688
Affx-961022662	1	24048218	Subspecies	CTCCTGTTTTTATATCAAAAACAAGAGGATTGTCA[A/G]ATACAATGTTAATGGCCAGGAAAGATGGGTTATCT	A // G	0.742
Affx-961022664	1	24149083	Subspecies	TATGTCAGATCATATGTATTGTGAACAGAGTCAAT[C/T]TGTAGTTGGTCAGTTCTTCTATCCTTATTATTTGG	T // C	0.738
Affx-961022667	1	24267054	Subspecies	AACAGTTGGAATGATCATGCAGTGGGATACCTTAT[A/T]TCATTACCATAATCTGGAGACACATGTATCAATGT	A // T	0.7
Affx-961022668	1	24387505	Subspecies	CTTCATGGTTGCACTCTAAATCAGACCTCTAATGA[C/T]TGTGTTATGAAATGTATTGTTAAAATAGGTGAAGT	T // C	0.736
Affx-961022669	1	24387979	Subspecies	CTAACCCGTGATACTAGGAGAGGGTGAAATGACAG[G/T]AAAAAGCTGCTGAACTACACAGTGTTAGAATGTTG	T // G	0.654
Affx-961022670	1	24389460	Subspecies	CTTGGCACTGTTAGGGGGACTTCAGATTATATTGC[A/G]GATAAGAACAGAACAGGGCTAAAAAAAGGATTCAA	A // G	0.634
Affx-961022671	1	24389922	Subspecies	TTGTGTTGTCTATGTAGTGGGTGACTGGCCTGTCC[A/G]CTCTGACCATACCTTGCTTGATTGTACCAAATATA	A // G	0.656
Affx-961022672	1	24390117	Subspecies	ACTTTATTTAAACTGGCCTATGAATGAAAGAGCTT[C/T]CCTGGTGGCTTAGATGGTAAAGAATCCACCAGCAA	T // C	0.754
Affx-961104789	1	24399345	Parentage	CTTTTAGAAAATATTGAAATCTCATTCAAGTATCT[A/G]TATGGAGTTATATATTATATGAATACACCCAAACA	A // G	0.728
Affx-961104800	1	24765222	Parentage	TTTATTGGAGATGATGAAAGGTGGAAATGTTTACT[C/T]TTTGAGAGGAAAGCAGTAGTAGAGTCATAAATTTG	T // C	0.75
Affx-961104803	1	25356428	Parentage	TGAAGTGATGTCTGTAAAGTATTAACTCAGGTGAC[A/G]TTTCTGCATGAAGCTTTTTGAGACATTTCCACCCA	A // G	0.736
Affx-961022693	1	25915250	Subspecies	CCTTTAAAAGTGATCTATTCACTGAGAAATGTCTA[C/G]TTTATGCCATGTTATCAAAAACAAAAGATGGAAAT	C // G	0.696
Affx-961104837	1	25932271	Parentage	AATATTCTATGAATCAATAACAGAAACATAAACAG[A/G]CTCCCTAAATGGGCAGAAGACTTAGACAACACAAA	A // G	0.744
Affx-961022695	1	25974666	Subspecies	CAGTTTCATCATCTGGAAAGTGAGGATAATAATTA[C/T]GCCTACTTCACTGAGTTTTGGTGAGGATTAAATAA	T // C	0.66
Affx-961022703	1	26245536	Subspecies	TTCCATATTCAAGTTGTAAAATATAGTCAAGTGCA[C/T]AATTACATATGACTTTCTTGATTAAACAGGGAAAC	T // C	0.704
Affx-961022704	1	26246848	Subspecies	TTGTCTTTTATGTTTGTACCAAGATTTATGAAAGC[A/G]TATTATTCCATACTCTTGAAAACAACACCAACATT	A // G	0.748
Affx-961022721	1	27390789	Parentage	AAAGATGTAGAGTTTGAAGTTACTTGTTTAAAGCA[A/G]CACATCTCGTAAGTGGAACTTCAACTGAACCTATG	A // G	0.696
Affx-961022724	1	27583181	Subspecies	AAGTAATAGCAGTTTTAGATCCTGAATTTTAAATC[A/G]TTATAACTAGGATGAAACACACGGAGAAGGCAATG	A // G	0.706
Affx-961022725	1	27584902	Subspecies	CATTGCAGGTGGATTCTTTAACAACAGAGATGTCC[A/G]GAAAGCCTGGCAGAAGCCTTTACTGAACCATTAAT	A // G	0.65
Affx-961022727	1	27588469	Subspecies	ATCCAAATACCTCAATCAGTAATAATACAACCACT[C/T]TAAGCAGTCTTTAATGGGTAGCTATCAATTCCTTT	T // C	0.694
Affx-961022730	1	27624898	Subspecies	AGTATGATTTTTAAACATCTGTTTTAAATTGTCTT[A/G]TTCTCTATTAATATCTATTACAAATTTTAGATATT	A // G	0.658
Affx-961022731	1	27625993	Subspecies	GAGTAGAATATATAGTTATTGTTGATTGACAAGTG[A/G]AGGTTAGAATTGTAGCAAGCTCTCTTTATGATCTG	A // G	0.72
Affx-961104942	1	27640140	Parentage	GCTCAACATAAAGTAGGCAATTCCCACTTTCTCTG[A/G]TGTTGCAGTAATCCTAAAAAGACCATGTAGGCTGA	A // G	0.734
Affx-961022733	1	27672174	Subspecies	TTTTCTTTATATTTACCCTTTGACAGATTAGGTCT[A/G]TCAACTGTAGAACATGACAAAACAAACACGTTGTG	A // G	0.716
Affx-961022742	1	28156066	Subspecies	ATCCTTTCATGTTCTGCTACACACTACCTTGATCT[C/T]TGGTTCACTCTCCTATTTCTGTCTTGGAGATCGAT	T // C	0.65
Affx-961022743	1	28160876	Subspecies	TCCCTCTACAGTTGGAACCTTCCTCACAAAAAGTA[A/G]CTCCCACTGTCTTTTCAGAGCTTCTCCTACATCTG	A // G	0.692
Affx-961022753	1	28447931	Parentage	AAAGAAAGCGCTTTAACAACATAGAAATTCTGAGC[C/T]ATATAGGACCATCAGTCATTTGTAAACTCAAAACT	T // C	0.702
Affx-961104983	1	28450096	Parentage	ATAATCCCTGTTATCTATTAAAACAGATTACATAA[A/G]TTGCACTCAATAAGACAAAGCTTTACCATTATTTG	A // G	0.754
Affx-961104988	1	28709471	Parentage	AAATGCTATAGCTTGCCTAAATAGTAAAGAAATAT[G/T]CAAAAGCCTCTAATTACACTAAAAATATATTAAAA	T // G	0.788
Affx-961022757	1	28722854	Subspecies	ATTTCCTATATGGACCAGGGTATTTAAGTCATGTG[A/G]GGAGACTTAAATACCCTGTGAGTATTTAAGGGACC	A // G	0.672
Affx-961105004	1	28762098	Parentage	ATGGTGTAATGGCATTTTCAATGGGAACATATGAA[A/C]ATCCATGGTGTAATATCCCAGCCAAGGTACTGGCA	A // C	0.788
Affx-961105015	1	28938375	Parentage	CTATTAATCAAGATAACTCTCACTACTGAACACGA[A/C]ATTAGACTACAACATAGCACCTTTTATGTTAGCAG	A // C	0.748
Affx-961105025	1	29032794	Parentage	CTAATTTGGCTGTATTATAAGGTAATACTGGAGAA[C/T]GAAGTTAGGATGGTAATCGACTAAAAAGGTCTTCC	T // C	0.728
Affx-961105057	1	29499070	Parentage	TTTAGGTAGGTTAAATTGTTTATTTGAGATTTTTC[A/G]TGTATATTGATAAAGCTTGTCTCTTGAAACAACTT	A // G	0.74
Affx-961105058	1	29503713	Parentage	AGAAACTATGGTTACCAAAGAAATGTTTTTATACA[C/T]ACACAGAATAACTTAGCTATACTATGTTTGTGGAA	T // C	0.764
Affx-961105067	1	29573798	Parentage	CTGCCAAATTTTATTGGTAAACTGAGTTATCAAGC[A/G]GAGAGAAGTTAAAACTCATACAATTATGGGAGTAA	A // G	0.73
Affx-961022781	1	29809833	Subspecies	TCTTGATTCCTTCTATCTATCCCTTACTTTCTCTT[C/T]ATTTTAAAGTTGAGATTCATTTTTTCCTTTGGGAG	T // C	0.71
Affx-961022782	1	29809902	Subspecies	AGGATATATTCTAGAATCACTCTTAGAGCTTTTTG[A/T]ATTCCCAAGTTTTTATGTGGCTGTTTGTGTGACAG	A // T	0.748
Affx-961022784	1	29815527	Subspecies	AGAGCAATCATATCAGGGAGTAGGAAGGTAATAGT[G/T]GCTCTTTACTAAATTCTAGCAACAGCATTGGGAAT	T // G	0.748
Affx-961022786	1	29820735	Subspecies	CACCATAAAAATGATTAGGATATAATGTGACAAAA[A/G]TTCAAATGTCATGAGAAATTAAAAATGCAAAATAT	A // G	0.716
Affx-961022787	1	29823536	Subspecies	TCATCAGTAAGGAGACAAATTAATATTATGTATCA[C/G]TTGATGGAAACAGTGAAAAAAATGTGCCATCATTG	C // G	0.686
Affx-961105185	1	30195350	Parentage	AACTATGCTTTGAGTAGTAAGGATACTTTTAAAAT[A/G]TTCTTCCAATCCATGAAAATGGTATCTTTTCATTT	A // G	0.788
Affx-961105237	1	30510548	Parentage	CAGAAAAATTCATGCATCTTCACATACTTACAACA[C/T]ACTGATAGATACAAATATCAAAAGACAATACCAAT	T // C	0.748
Affx-961105261	1	30781972	Parentage	ATCAAGTATCAACTGATAGGCACTATATGTAGATG[C/T]AGTCTCTTGTTCTTTGATTATTACTCTTTCACATT	T // C	0.75
Affx-961105436	1	32461607	Parentage	AAAGATCATTAGTATATAATGACTGCACACAAGAA[A/C]CTTTGAATCATCTTTGGGAAAAAGCCAATTCACAG	A // C	0.74
Affx-961022866	1	33172471	Subspecies	ATATTTTTGTGGCTGTGCTGATAAACAGTGTGTAA[C/T]TTTGACAGTCAAATACCTCTACAATTTGAAAGAAT	T // C	0.644
Affx-961022868	1	33175930	Subspecies	TTCTTGTTATTTATAAGAGTGTTTGAATAGCTGAT[A/G]TATTTAGTGGTTGTAGTAGCCAACTGTCAGCAATG	A // G	0.686
Affx-961022869	1	33179440	Subspecies	AAGATTACTCTAAGCTCATTTGTTAAGATAAACAA[C/T]GCTCAACAGTGGTTGTAGGACAAGAAAAACAGGAA	T // C	0.71
Affx-961022870	1	33179988	Subspecies	GCCCTCTCCGAATCTCTACATTCTAGGAACAACCT[C/T]TTCTCAGAACAGTGGTTCTTAAATGTTCATATGCA	T // C	0.662
Affx-961022871	1	33180093	Subspecies	TATTCCCAAGTTCCATGCCCAGTCACTAATTCAAA[A/G]GATATGAGATGAAGTCAAAGAATCTGCATTTTTGA	A // G	0.684
Affx-961022872	1	33180256	Subspecies	TTATTCAGTAGGCACAGTGTATGTGGCATTAAAAG[C/T]AGGTTTCTTTTTAGAAAGAAGAAATAAAATTAAGC	T // C	0.706
Affx-961022873	1	33180697	Subspecies	TTAATTGCTCATAATTCACTATAAGGATTTTTGCC[C/T]CCACTATTCCCTAGGCAGGGAATCACTCTTCTTTG	T // C	0.718
Affx-961022874	1	33181607	Subspecies	GATTTTTCTTTATCATGTAAACAATATTTAAATGC[A/C]TTCCAATGTGAAATAAGCAAATGAGTAGTAATACC	A // C	0.674
Affx-961022875	1	33182035	Subspecies	AAATGTTAACTTGAAATTTTATCTCTTGAAAGTAT[A/G]ATGTTATCTTTGCATGTAAAATTAATGTGAGTTAT	A // G	0.748
Affx-961022876	1	33182221	Subspecies	ATCAATGTCACACAGCTAAGAATCATGCTGAAGGA[C/G]AGATATCAGATATGTAGGAGAGAAGAAAGAGGAAC	C // G	0.686
Affx-961022878	1	33191350	Subspecies	GTTGTATGGGGAGTGTCTCCTCATACTTTGCTATG[G/T]AGGATTTTCTAATATTACTCTATGATAGCTGGCTA	T // G	0.71
Affx-961022879	1	33195299	Subspecies	GGACACATTTAAGTTCATAACTACCCCCTGATCAA[C/T]GTCTTTAGAACAGACTTGTTAGAAAAAAACAAATG	T // C	0.738
Affx-961022881	1	33197635	Subspecies	CTTGCTCATCAAACAATCATTTCTTAGTGATCTTG[C/T]CTGAACTTGAATACAGATTTCTGCCCATGTTTCCA	T // C	0.654
Affx-961022882	1	33197732	Subspecies	ACAAAGCCAGTTCACAAAGTTAATTAAAATTTTCC[A/G]TCTCTTCACTTCCAATTAGTTTCATTGATATGACA	A // G	0.65
Affx-961022883	1	33198639	Subspecies	AAAAGTCATGTAATAGTCATAAAAGTGAATAGTCT[A/G]TCAAGAATGTAGTTTGGTTTCTTATATTTTTACTC	A // G	0.738
Affx-961022884	1	33199428	Subspecies	TTTACTTGTTACCTTAAAGAGAAAGAGGATTTATT[A/C]TAAGGTTATGTATCTCATAGAATTAAAGGAAAAGC	A // C	0.742
Affx-961022886	1	33205115	Subspecies	TTGAAAGACCAGGAATGGATTGCAGTTAGGCATAC[A/C]TAGACCCAAGGTTACAAATTATGTCTTTATTGTTG	A // C	0.682
Affx-961022887	1	33205682	Subspecies	TGTCATTTTGGTAGTTTCTGGTGGACCCTGCTTGA[A/G]TCTCTTGCCCAGCTTTGGCTGTACTGTGGAGAATA	A // G	0.62
Affx-961022890	1	33211262	Subspecies	CTGTCACCTGTACATCCGTCCACCTATCAAACTCT[C/G]AGCTTTTTCTCTGGCTATCATTACTAGCTATCAGG	C // G	0.762
Affx-961022891	1	33211647	Subspecies	GCAACCAAGCTCCCATTGCCACCACTCCATCAGGA[C/T]GGTTCTAGACAATGTCAGTGGTAAATTTTTGAATT	T // C	0.722
Affx-961022892	1	33215243	Subspecies	TCAATCCAATGCATACAGCCATCCCACACAAATAA[C/T]CTGGCACAATTCAGTTCAGTTCAGTTCATTTGTTC	T // C	0.644
Affx-961022898	1	33372421	Subspecies	GATAGTATTCATTTGTTATTTGCCTAATCAAATAT[A/G]TAATTCTTTGAGGTGAGTTATCTGTATAAATCTAT	A // G	0.718
Affx-961022907	1	33707784	Subspecies	TCCATTCATATTTCTTGAATAAATTATTAGAATTG[C/T]CTCAAAGGTATTGCTTGACTGTTGATAATTATTTT	T // C	0.67
Affx-961022908	1	33711565	Subspecies	GTTACCCATTATTTTTGGTTATTTTTATTCCAACC[G/T]GGACTTATAAAAACACATAATATAGTTAAGTTTCT	T // G	0.718
Affx-961022910	1	33713557	Subspecies	CTAATTTCAAAAATATAAAGGTTTACCTTAGAGAT[A/G]GTGCAGATTCATTTCCAGGCCACCACAATAAAGCA	A // G	0.712
Affx-961022911	1	33713926	Subspecies	TAATTTGTTCAATCAATAAACATTAAATATCTTTC[C/T]ATTAATTTGGATCTTCTTCAATTTGTTTCATTAAT	T // C	0.648
Affx-961022912	1	33713972	Subspecies	ATCTTCTTCAATTTGTTTCATTAATTTAGACTGCA[A/C]TAGTTTTCAATATATAGGTCTTTTACCTCCTTGAT	A // C	0.68
Affx-961022916	1	33802639	Parentage	TACCCATCCTGTAACATTCACAACCAATTTTTTAA[C/T]ATATGACTCAATTTCCAACATTCCTACTAAACTTA	T // C	0.792
Affx-961105549	1	34358752	Parentage	TATAGCATTTTATATTAAATCTATCATAATTTTCT[A/C]TGCATTAATCTCATTATAGGTCTTTCCTTCAATTT	A // C	0.83
Affx-961022933	1	34642441	Subspecies	GAATGGCTGTCATCAAATATCAAATAAGCCTTAGC[C/G]AGGATGTGGAGAAAAGGAACCCTTGGACACTGTTG	C // G	0.666
Affx-961105563	1	34672651	Parentage	ATTCAAATGTCTTAGGTTTCCTTTAGTCTTTTTTC[A/G]TAAATGTAAATGTCTATAGAGAGAAACATCTAATA	A // G	0.734
Affx-961022935	1	34837794	Parentage	GTTGATAAATTGTGAGAAAAAATTAATATTGTAGT[C/T]CATCAACTTTAATGTGTGGACTTGTGTGCTGTGCT	T // C	0.676
Affx-961022937	1	34904400	Subspecies	GTTTTTTGAGCTTTTCATATACTTAACATTCTAGT[C/T]CTTGGTCAGGTATGTGGTTTGCAATTTTTTCTTCA	T // C	0.688
Affx-961022938	1	34908388	Subspecies	AGATCTGTTCAGCTTAGAGGCATTTTCATGCTGGG[A/T]AGATGCAGGGATCTCTCAGTTTCAATCCACTGATC	A // T	0.616
Affx-961022940	1	35022345	Subspecies	TTTCTATGCATTCCAAAATTAAAGAAACATGAAAC[A/G]CATTGAATATCCAACTGCTCCTCTCATTATGCTGC	A // G	0.704
Affx-961022941	1	35025541	Subspecies	TATGTCAGCAAATTTCACAGCATCTTTGTGAGATC[C/T]GTACCATTCTCACTAAGCTTAATTCTGCCAGATAC	T // C	0.674
Affx-961022942	1	35025794	Subspecies	TTTAGAATGTATACTAGGGACGATATAGGGATGAG[A/T]TGTAACCTGACAAACATAGATATTATTGACATTAG	A // T	0.802
Affx-961022943	1	35026020	Subspecies	GTAGAAAAAAAGTTCATTAGATATTGTGTGAAAAA[C/T]ATTTATTCTAAAAATGACATATTTTTCATTCTGAA	T // C	0.702
Affx-961105605	1	35469714	Parentage	ATGGGAGCTTTAATGTTGGAATTAGACCAATGAGA[C/T]TGAACTAGACAGAAATACATCTGCATGCCCAGTCG	T // C	0.776
Affx-961105609	1	35496861	Parentage	CATCAGCAAGTCCTGTCAGTTCTATACTAATATGT[A/G]TTCCTTATCATACTCTGTAAGATGCTACATGATTG	A // G	0.798
Affx-961022958	1	35951145	Parentage	AATGTCTAACACAACTGTTTTTGGAGTCCAGGTGC[A/G]AAGAAAGAGAATAACCCAGAAAAAGTATTTGAAGA	A // G	0.672
Affx-961022987	1	37410675	Subspecies	AAATGATTAGTATTTTATATTCTATATTATACCTA[C/G]TGCTTGATTTAACCTAGGGCTATATGTATATATAA	C // G	0.722
Affx-961022988	1	37414455	Subspecies	TAAGTAACTCTGAGTTACTAAACAGACAGACTACA[G/T]TACTATTTCTAGTCAATCATATGCCCTGTGTTAGC	T // G	0.724
Affx-961022989	1	37414607	Subspecies	CCTGGTGCTTAGCAGACAGCTTTGTTACACAGAAA[A/G]ACCCTGGAGAATTGCAGCAGCCTTCTTCTCCAAGC	A // G	0.652
Affx-961022990	1	37417437	Subspecies	GACCAAATCTCAGCCCCCTCATATCTTTCAGCTTA[G/T]ATTCACACCCTGCAGGAGTGTCTTCTGACAATAAC	T // G	0.63
Affx-961105734	1	37498230	Parentage	CCAAGGGGAAAAGAGGAGGAGGAGCGGATAAATCA[A/G]GAGGTGGGAATTAGCAAAAATACACTATTATACAT	A // G	0.74
Affx-961105736	1	37517383	Parentage	ACATTTAAAGAAAGTCAATTAATGATACCAATTAG[A/G]AACATAAAGGCAAATATCCTTCAGAAAATACTAGC	A // G	0.742
Affx-961105910	1	38228622	Parentage	TATCATTCCACTTTTACTTCTTCCTCAGCGTGTAA[A/C]TTGTACACAATTCTGCTTGATACTCAAGGCTTCCA	A // C	0.758
Affx-961105949	1	38937366	Parentage	GAGTTATAAATGAGCAGATGATACATGGGAATTTC[C/T]GGAAAATAATTGTTCTCATTGTATGTAAATGACAT	T // C	0.752
Affx-961105953	1	39166424	Parentage	ACACTGTCTTTTAACACTGTAAAACTGTAACACTG[C/T]TAGATTAATGAAAGAGGATGTTCTTGAATCTTACC	T // C	0.77
Affx-961105957	1	39413484	Parentage	TGAGAGAGAGACAATAACAACTAATAAATAATGAT[G/T]TCAAATAAGCATCTGGAATAATAGAAAAGATAAAA	T // G	0.762
Affx-961023029	1	39688335	Subspecies	GCATAAGAAGGTTGATTCCACAGAAGTTACCAAAT[G/T]TAACATCTAACACAGTGTGTTCTATTAGGGTAAAT	T // G	0.714
Affx-961023030	1	39688833	Subspecies	TTTTGACCCCTTTCACTCAGCTATAGCCATCATGA[C/T]GACTATAGCTAATAACATTATTGCATATTTGAAAT	T // C	0.702
Affx-961023031	1	39689769	Subspecies	TAAACCTTACCATATGAAGATGGCAAAACTCAGGA[C/T]TCAGTTTCAATCTCCTTTCTCTGACTCTTCTATAC	T // C	0.67
Affx-961023032	1	39695442	Subspecies	TGTTGTGATGAAACAGAACCAAGGAGCATATACTC[G/T]CCTGACAGATCCATATGATCTGGCATTATTTACTA	T // G	0.668
Affx-961023037	1	39700678	Subspecies	ATACACAAACACTTATTTTTCTGTTTTTTTATTTT[G/T]GGGACTAATATAGGAAAAACATAAAGCATCTACTA	T // G	0.702
Affx-961023038	1	39739828	Subspecies	CCCATAAGTCTGTTCTCAATGTCTGTGTCTCCACT[A/G]ATGCTCTGCAGATAGTTGTTTCATCAATACCATCT	A // G	0.72
Affx-961023042	1	39741017	Subspecies	CAGGAACTAGAGCTTCGCTATCTCCTTCACTAGTA[G/T]TATAAATTATCATCACCTTGACATAGCATCTTTCC	T // G	0.782
Affx-961023043	1	39741304	Subspecies	AACAGAGTCCTTTGACCCACCAAGATATATTTTAT[C/T]TCTTTCCCAGCTTATCTCTTAGCATAAGGGGTCAA	T // C	0.72
Affx-961023044	1	39741677	Subspecies	ATAATGGGCCACATAGTTTTCTAATTGATTTACCT[A/T]TAAAATCTTCAGTATTCAAAGCTACCTGTGAGTAT	A // T	0.734
Affx-961023045	1	39743174	Subspecies	AAAGCACTTTGAAGACAGTAGTTCATTTGAGCATA[A/G]GGGACCTGATAATAGAGACAGCAACAACAACTAGA	A // G	0.688
Affx-961023046	1	39760816	Subspecies	CTCCTTCCTGTGAGTCCAATAGGTTTCCAATCTGC[A/G]TACTTTCCCTCTAACTTGAAACATTTCATCTGGAA	A // G	0.756
Affx-961023047	1	39761971	Subspecies	TAAAAATTATGCTTTATATAAAGTTTTATGATGGC[G/T]TTCATTTAGGAACAGAACAAAACTTTTAAGATGAA	T // G	0.722
Affx-961023048	1	39762696	Subspecies	CCATTCAATTAACTATGGTAGGTTTAAATTAGTTA[A/C]TGTAGACTGTGTAAAATTACAAAATGCAAGTCCTG	A // C	0.698
Affx-961106088	1	40957160	Parentage	GAGTGTTAGTTCCCTAGGTTACTGCCATGTTCCCA[A/G]TTCCAGTTCTAAATCCTGGCTTTATTTCTATGACA	A // G	0.772
Affx-961106090	1	40960491	Parentage	TCACTCATGTCAAAAAATATTTGTAAAGTGATACA[G/T]TATAATCAAACTAAATCCATGAAAACTTAAACTAG	T // G	0.744
Affx-961106097	1	40995920	Parentage	AAGTATATTTGTAGTGGTACTGTGGAATTTTAAAT[A/G]TCAATTGACATAAAGCCACTATGAGCTAATTATCA	A // G	0.76
Affx-961106125	1	41165486	Parentage	ATCTGTATATCCTTTTTGGCAAAGTGTCTTTTCAT[A/G]TTCTTTTCGCATTTTCTAATTTAATGTTTGTTTTT	A // G	0.744
Affx-961106190	1	41766458	Parentage	GCTGTATTTTAAAAGGAAAACCAAAATATGAATAT[A/G]AATTGCTTGGGTCTCAAGTCAAGGAGTATGATGAG	A // G	0.728
Affx-961106305	1	43963570	Parentage	GTATTTGGCATTTGATGATATCTGTGTGAATGTAC[A/G]TATCTCTGCATACTGCTCTACTGTGAATATAAAGT	A // G	0.742
Affx-961023127	1	44488509	Subspecies	GTCTAACAACAGCAGATACAACTCAGAGAGGAGGA[A/G]TCTGGAACAGGAGTAGTCACTGTGTTAACACTGTT	A // G	0.71
Affx-961023128	1	44492361	Subspecies	TATAACTTTATGGAACCTTCATCAAGAAAGGAGTA[A/G]AGGAAGAGCATCCTCCCGTACTTTTGTTTGTATTT	A // G	0.766
Affx-961023141	1	45137258	Subspecies	CAAAATTTACTCCAAAAAGAAGGGAAAAAACCTAA[A/G]TAGAACAGTTACCATTAAAATAGTTATTGGTATTT	A // G	0.72
Affx-961106375	1	45609305	Parentage	CCTGATTTACTATATTGATTTTTGTAAGTATAGAG[G/T]ACAGCTCAAAAAGATGAAATTATGAATGCCTTCCT	T // G	0.74
Affx-961106418	1	46478113	Parentage	AAGGTAGATATGGTATGATACATAGATATAATAAT[A/C]TACCTGGATATTAGATATAAGAGTGATGTAGGTAG	A // C	0.734
Affx-961023171	1	46793273	Subspecies	TAGCATAATGAGTCTCTAAATTTGGCTTGTTTGTA[G/T]TTAGTGGTGACTTTGATGCTAACGGAGCATATTCA	T // G	0.746
Affx-961023186	1	47453785	Parentage	TTGTTTTACTGCTACATTAACTGTTCTCTCATTTT[C/T]CCTGAAATAAAATTCTATGATCATTTCCCTCCAGT	T // C	0.656
Affx-961106491	1	47576105	Parentage	TTACACTGAACATTTATCCACAGCTATCTTAAACA[C/T]TTAAATTTTATTGTTGGATTTCCTGCTTATTAAAT	T // C	0.806
Affx-961106507	1	47643012	Parentage	ATATTTGCAGTTTTGCATATTGACTTAGAAGCTAA[G/T]TATAATTATACCATTATCAATGTTTTGTACTTTTA	T // G	0.798
Affx-961023217	1	49721608	Parentage	ATGATTTATAACATTCAGTTCGTTGTGAATTTGCT[C/T]GCAACAATGCAAATCCCTGAGTTCTGTGCAGGTTG	T // C	0.656
Affx-961023256	1	51727360	Subspecies	TACTAAAGAATGAATATGGAGTCCTAATCCATACC[A/G]CGTATAAAAATTAACTCAAAATGGACTAAAGGCCT	A // G	0.692
Affx-961106686	1	51746040	Parentage	GAAGGAACACTACATGATGGGATATTATATAAGTA[G/T]GAGCAGAATATGAATAATGCAGGGAAGGTAAATCC	T // G	0.748
Affx-961106720	1	52688633	Parentage	GCTGTTGAGTTACCACAGGCATAAACAGTGTACAG[A/G]TTTCTGGAAAGGTCAATTAGATGGGGAGGAACTGG	A // G	0.748
Affx-961106746	1	52907445	Parentage	ACCATAACTCACCTATCTTTGTAGCTGTCTCAGAG[G/T]CCAGCACATAGTAGGCATTCTATAAATAGTTGTTG	T // G	0.748
Affx-961023305	1	54837728	Subspecies	AGTTTTGCCCTGGCAAAGAGCATTCTGTGAGTGAC[C/T]CTGCTGATACACTTGTGCTGTCCTAACTGTAGCAC	T // C	0.692
Affx-961023306	1	54851008	Subspecies	CAAAAAGCATGACTTTCTCTTACCACCATCATATC[A/G]TTTTCTTCTAAATGGATGGTCACCAGCCTCTCCTA	A // G	0.722
Affx-961023308	1	54899194	Subspecies	TTGAAAAGGGTGTCATATAGGGCACTTTTGATAAG[A/C]AGTTACCATCTGGTAGACCATAGAACAAAGACTGG	A // C	0.688
Affx-961023309	1	54932098	Subspecies	CTTACCTTTGCACCTGAGCTACTTTGTCATTTTCC[C/T]GTCTTAAGTTACAGAGGATGAAATGACACTGAGAG	T // C	0.624
Affx-961023311	1	54984729	Subspecies	AAAAAATTTGCTTTTAAAACTTGTAGTCTCTCTGA[G/T]CCCTCAAGGGTAAAACGGTATAATGCCATTTAAGT	T // G	0.638
Affx-961023312	1	55018878	Subspecies	CATTCATCTTGACCCATCAGCAGCATTTTACACAA[C/T]TGATCATTCCTCTTTCTTGAAGCACTTTTTTTTTC	T // C	0.612
Affx-961023317	1	55306985	Parentage	GGCTATAATACTTCCCATCTCAGTTAGCACTTGAG[A/G]ATCCAATGAATAGACAGAAGCTTCAAACAAATTCA	A // G	0.656
Affx-961023319	1	55363422	Subspecies	AGTGCTAAAGTAAAATGGGCCATGAAGAAAGTTCA[C/T]AATTGGCATAGGGATAGAACCAATATACGGAGAAG	T // C	0.738
Affx-961106901	1	55949622	Parentage	AGCCCATCTGGGTTTTTGAAGTGCCAGTACTGCAA[A/G]TCTCAATACTAAGTTAACTTTCAGTCTGAAGATAT	A // G	0.742
Affx-961106903	1	55950475	Parentage	TTACAGTAAAACCTCCTCTTTGAAAATCTGTGCCA[G/T]GTTTTGGATTATGCACTAAGCATTTACAGCTCTCA	T // G	0.744
Affx-961106907	1	56224381	Parentage	GAAAGGGGATAATTATCTACAGGGGCAAATAATAA[C/T]CCAAAATGTTTATGCACTTAACACAGTTTAACATA	T // C	0.738
Affx-961106908	1	56242184	Parentage	ATTTGGAAAAGGTTAAGTGTAAGTATAATATCCAA[C/T]ATTCTTAAATTATGCATCCTATTATTATGTTAGTC	T // C	0.744
Affx-961106909	1	56242231	Parentage	ATGCATCCTATTATTATGTTAGTCCCAGGTAGACT[A/G]TGGTAAGTAAAGGATGCATATAGTAAACCCTAAGG	A // G	0.77
Affx-961023332	1	56421529	Parentage	TTTGAGTTGATTTTTGTGTTTAAGATAGTGATCCA[A/G]TTTCATTCTTTTGCCTGTGGCTGTCCAGTTTTCCC	A // G	0.754
Affx-961023341	1	56819741	Subspecies	AGAAGATAACTGCAGAAATGACTAGAATATGCCTT[C/G]TAAGGTTAGGTCATAAAATACTTTGTAGCTTCTGC	C // G	0.73
Affx-961023342	1	56825501	Subspecies	TTTCCCACATTTGTCTTCTGAATGAACCAAGAAGC[A/G]AAGGTATTCTAGTAGCACATTTGACACTCAGATCT	A // G	0.686
Affx-961023353	1	57588335	Parentage	TCTTTAAGTAAAAAATTTTGATTGTCAAATTGTGA[C/T]GAAAGTGAATAGTCCTACTATATTTGCTTGTCATC	T // C	0.734
Affx-961106958	1	57635064	Parentage	TACAACACATGGGTAAAGTTAAATACAGAGTCAGA[C/T]TTAGAAAATTCTAATTATTAGAACAGTGTGTTAAC	T // C	0.732
Affx-961106971	1	57764069	Parentage	TATCCAATCCAAAGAGTTACTTTCAAATAGAAAAT[A/G]TCAGTCACAATCCATAGCTCAAGCATAAAGCTTTT	A // G	0.736
Affx-961106981	1	57956873	Parentage	TATGGTGTGAGAAAGTAGTTTAGTTTGAGTCTTAT[A/G]CATGAAGCTGTCCAAGATTTCCAACGTCATTTATT	A // G	0.746
Affx-961023360	1	58067300	Subspecies	GCTGGAGGCTCAAGAACTTTAATTACAAGTAATAT[C/G]TTTAAAGTACATTCCTTATTGACAAGTCAGGTTAA	C // G	0.708
Affx-961023362	1	58071432	Subspecies	AGTACTTAGAAAAGCATCTTGCATGTAATAAGTGC[A/T]CAATAAATATCATTAGTATATTTGAAGTATTGTGA	A // T	0.66
Affx-961023365	1	58081660	Subspecies	TTTAAGGATAAAGTTTAGAGTAACCAAAATATCTT[C/G]AGGGAGACAAACATATTAGTAAAACAAAATAGCTG	C // G	0.754
Affx-961023367	1	58087916	Subspecies	CCAAATGGATCCCACGACGATCAAGATAATAAAAA[C/T]AGGGGCAGTGATATATAAATTTTTTAAGTGTGCTG	T // C	0.674
Affx-961023368	1	58096747	Subspecies	TCTGAAAAATATGTTTGTATTACTATCTTTTTAAA[A/G]AGCAACAATGACTTTCAGAATGCTTCTTATGACTT	A // G	0.656
Affx-961023369	1	58098417	Subspecies	CACTTCACTTCATTTCACTTCACTGCCCCATAGAA[A/G]TTGTTACTTTTAGTAACAGAGCAAAATGATCTTCA	A // G	0.78
Affx-961023370	1	58104779	Subspecies	GTGAAAAGGTGTTTTACTATGTTACAGACATTTCA[A/G]GCACCAGTGAGGAAGGAGAAGTTTAGCACTGATGT	A // G	0.688
Affx-961023371	1	58107896	Subspecies	CACTGTAATAGCAAGACTTCTAGAAATAATCCAAA[C/T]CATAGGGAACTAGTTTTCTAAATTATAGAACATCC	T // C	0.692
Affx-961023372	1	58112794	Subspecies	TAGTCACAAAGTCTGCATCATTTTAGTAGGACACC[A/G]TATTAATAAAAGTCATATTGTTGGGCTAACTTTTT	A // G	0.644
Affx-961023373	1	58112887	Subspecies	GTCCAAAACTAGGTAATGAAAACAAATTTGTTCCC[C/T]ACTCAAGGTAGATGTTGTACAAATGTGTATCAGTG	T // C	0.65
Affx-961106985	1	58231955	Parentage	GGGAGAAAAAGGAGCATGAATAATGTGAGCCATTT[A/C]AAGAAGTGTATTAGCAATATTACCAAATCGAGATG	A // C	0.744
Affx-961107010	1	58541490	Parentage	ATAACCACAGTGAGGAACTAAGTCAATCTTATCAA[C/T]CACTATACACATTAATACAGTTATATCATTATTAA	T // C	0.746
Affx-961107011	1	58542851	Parentage	TTTCAATATTAATGGAAGTAATTCATTAAACAGGT[A/G]GGGTTAATTTTATATGACAGAAAAGAGAAAACAGT	A // G	0.728
Affx-961023380	1	58618933	Parentage	CTCTCTCCATTTTCAACCTCTCCTTACTAGCTTCA[A/G]TTCACCCACCTTTAAATGTAAGTCTCTCCCATTTT	A // G	0.712
Affx-961107014	1	58619375	Parentage	TCCCCTCTATTTAATGTCATTCTCCTCTCACTTGA[C/T]GCATTTTTGATGTTTACATCTAATTCCAAGGTGCA	T // C	0.728
Affx-961107018	1	58766289	Parentage	TTCAGTAAGTGGTGTTTGGAAAACTGGACAGCCAC[A/G]TATAAATCAGTCAAGTTAGTACACACCCTTACACC	A // G	0.77
Affx-961023408	1	59956468	Subspecies	CAAATTGTATCATCTTGGACAAGTTACTTAACTAA[C/T]AGTGCCACCAATTTTAATTTTTCCTAAAATGGGGG	T // C	0.64
Affx-961023410	1	59986525	Parentage	TAGAGAGCATATGTACTTGTTATTTTGGTAGATAT[G/T]ATAAAATTTATTCTCCATTTGAGGTTGTTTATTTT	T // G	0.736
Affx-961023420	1	60598401	Subspecies	ACTTAATTACTGATGTCATTTATCTCTCTATTTGC[A/T]CCCCAACCATAAGTGACTCGTTTCTCATTAACATT	A // T	0.622
Affx-961023422	1	60619478	Subspecies	GTCCTGAAGAGGTCAGGCTATGCAAGAGTTTTTTT[C/T]CCCTGATAGCTGGTAAAGAATCCACCTGCAATGCA	T // C	0.636
Affx-961023433	1	60994139	Parentage	TATTCTGGGTTTTGTATCTTCAGTTATTTTTTTCT[C/T]CAATTTCCCCTGCTGGTAGAGTAATCTTATAATAA	T // C	0.688
Affx-961023436	1	61178478	Subspecies	AGGATGCCACTAAAATAATATTCATCAAGATGTTT[C/T]AGATCACAAACATAATGTAAACTGAAAATGTGTGC	T // C	0.712
Affx-961023454	1	62178811	Parentage	TTGAGCTGGATCTTACCAAAAGAAAAAAATAAACA[G/T]GTGGAGAAAATTTTTAATAGCATGTTAATCTCAAT	T // G	0.662
Affx-961023463	1	62458309	Subspecies	TTTCAACACGAGGAGGAAAATACCACAGAGATAGA[C/T]GTGAATTTAGATTTTCCGGAAAGTTCTGGTTGTGA	T // C	0.726
Affx-961023509	1	64464914	Subspecies	CAGGATAACAGGATGGGCTGAAGTCTGAACAACAC[A/G]CTACGGATTTAGGGAGGGAAAAAGCCAACTCTAGG	A // G	0.7
Affx-961023537	1	65590210	Parentage	TTCAGAGAAAGGCATGACCAAGAGGAAAATTTCTT[C/T]TGGAGGCCTTTAAAAGCCTCAAGAGGAATGTCAAC	T // C	0.682
Affx-961023540	1	65654273	Subspecies	CAGATGTTATGGTTTCTGTTTTCAAAGACCATATG[A/G]AACAGGGAAAGAAAAGGGAACGTGACTTCATTTAA	A // G	0.682
Affx-961023541	1	65657309	Subspecies	AAATATAGATAGGTAAGAAAATCAAACACGAATAA[C/T]GTCACTATCCAGAGGTACCCATTGGTAATGACATG	T // C	0.724
Affx-961023542	1	65659043	Subspecies	TTATCCTTATGATCCTTCATGATTTAAGAAAACTT[G/T]TATCCCATCTCCTTTCAGTCTTCATTGTTTTGACT	T // G	0.746
Affx-961023543	1	65661656	Subspecies	GTGGTCTTGTGAGAAAAGACAACCATGATCACCGT[A/G]AGCAGCTTTTCATTCTTATTTGTGAGTGGGAAGGA	A // G	0.644
Affx-961023545	1	65664008	Subspecies	TTATTACCACTGCTCCCCAGATTTGAAGGTCTAGT[A/G]TTTGGTCATTATTCCTTTGATGCATTGCAGGATTC	A // G	0.696
Affx-961023546	1	65670894	Subspecies	AAGGTGCAGGCACAAAACCACTTAAGGCAAGATAA[A/G]AAGGACTGAGAAGCTCAAAACTGGGAGACTACCAC	A // G	0.702
Affx-961107542	1	65679303	Parentage	TATTATACAAGAAAAGGTGTGCCCAGTCATGAATG[C/T]CAGAAGTCAGAAGGGAGATCATCTGATGTTCCAAT	T // C	0.736
Affx-961023553	1	65853415	Subspecies	AAAGCTGTCAGTAGCATATATCAGAAGTGATGGAA[C/G]TAGGATACTTGATAAATGATTTCTATTGCAATGCA	C // G	0.738
Affx-961023559	1	65988909	Subspecies	GCCCTTTTGTTGGGGCAATAAGCCGGATTTCTATC[A/G]CACTACTAGGGAGATGCTCCTTTTCTGCAGTGGGA	A // G	0.688
Affx-961023560	1	65989853	Subspecies	CCCAAACATGAACTTTGGTGAACTCTGCAAAACTG[G/T]TGCCATTAGAGTCTACAATCCATGTATTTCTTACT	T // G	0.72
Affx-961023561	1	65990839	Subspecies	CTCTTTCCTTAGAGCACTAAAGTGGAAAGACCAAC[C/T]CATATCCTTAGCTGGGTTGCAAATCAAGCAACCTG	T // C	0.65
Affx-961023564	1	65994123	Subspecies	AAACTCTCTTGCAGTCAGCCCCAAAAGGTACCAGA[C/T]CGAATCCATAAGATAATTCACTCTGCTGTATTGCA	T // C	0.684
Affx-961023565	1	65998892	Subspecies	ATTGATTACATAATCATCAGACTGTTAAGACTTCA[A/G]AGATGATACCACATAGAGCTAAAGTACTAAATACA	A // G	0.704
Affx-961023566	1	66000055	Subspecies	ATAGCTAGGTGATTGTCATAGAAACTCACAGGTAC[A/G]GAAACAGACACATTCTAAAATACATTAAAAGTAAT	A // G	0.756
Affx-961023567	1	66002895	Subspecies	GTTCAAGGCTTTTGTTTCTTCTTACCAACATCAAT[A/G]CTGACTTAAGAGACATGGTCCAAAACTGAAAATTG	A // G	0.654
Affx-961023569	1	66003717	Subspecies	TACAAAAGTCATCCTCAACTAAACCCTCACAACGT[C/T]ATAACTAATTCAAAGTGAATCACAGATCTAGAAGG	T // C	0.734
Affx-961023570	1	66004182	Subspecies	AATAATGCCTAAAATAATCAGAGAAAATAGTGTCA[A/G]TATTTTAACATTTCCTCTTCATTTTGCAAGTGACA	A // G	0.742
Affx-961023571	1	66005696	Subspecies	CTTATTTCCTAGGTATAAATACAAACATATGAGTG[A/G]GTTTGGCTGAGACAGTGAAAAAATTACAAAGGCCT	A // G	0.688
Affx-961023573	1	66006726	Subspecies	TATATAAACTAATATTACCAATGATTACAATAAAA[A/G]TACTTTCTAGAATCACTTTCACTTTCTTTCACTTT	A // G	0.714
Affx-961023574	1	66007186	Subspecies	CCAATGTTGACAAGTCATTTGACCAACATAATAAA[C/T]CAGGCCTCATTTCTTTCTCTCCTGCTCTTTAACAT	T // C	0.696
Affx-961023575	1	66008337	Subspecies	CATTCCACATCAGATGATCTGAGACCACTAAAATA[C/T]GGTAAAAATAAAAAAAGCTTTACCATTTACAGAGT	T // C	0.706
Affx-961023576	1	66008910	Subspecies	ATAATGTTCAGAAAAATATAAATTCAAGCTAACTG[C/G]ATTCACTTCAAATTCCAGTCTACCTTTGAAGCTGT	C // G	0.748
Affx-961023577	1	66009821	Subspecies	TTTTGACAATATCATCTAACCTTATGATTTAAAAT[G/T]TCATAAATATGTCGATGAGCTTCCCTGGTGGCTCA	T // G	0.722
Affx-961023583	1	66156562	Subspecies	CAACACTTGTGTGGGATGCTTCATCCACAGGCGTT[A/G]GCTGGTTAATTTGATGAGAAATCCATTCTTTCTGA	A // G	0.63
Affx-961107597	1	66205340	Parentage	TAGAAATAACTGTCTAGATTTTCTAAAGTTTCTAT[A/G]ATAAGCACACCTTACTTTTATAATCAGATATATAT	A // G	0.758
Affx-961107617	1	66351327	Parentage	AAACAAAAGATGTAGAACAGTAAGGTTAGCATAAA[A/G]TCACTTGAATAATGAATTTATGTTTTTACTTACAT	A // G	0.766
Affx-961107619	1	66409935	Parentage	GCATGACCAGAGAACACAGGCAGACATCTAAACAA[A/C]ATAATGAAAATGATGCATGAGTGAAATTAAAATAT	A // C	0.73
Affx-961107620	1	66410026	Parentage	TTAAAAGAACCAGAAATAAAGTTTTAAGTGAAAGA[A/C]TATAATGACTGAATTGAAGATTTTACTGAAGGGGA	A // C	0.73
Affx-961107622	1	66480583	Parentage	GACAAATTCCTACAAATACATGAGTTACCAAAACC[A/G]ACTCAAGAAGAAAGAGAAAATCTGAGTAAAGATAC	A // G	0.79
Affx-961023589	1	66617879	Parentage	ATATGAATGGGCTAAATAATCTATCAAAGATAGAG[A/G]CTGACAGACTGGATTAAAAAAAACAACACAGAATC	A // G	0.732
Affx-961023597	1	66844087	Subspecies	ACTTTACATATTGCTTACATATATGAATTATTTTG[C/T]AACAGTCCTAAATAGGAAATGACTAAGAGTCTATG	T // C	0.704
Affx-961023601	1	66868401	Subspecies	AATGACTAGCTTTGGGGATGCTTGTGGCTATCTAA[A/G]TAAAGCTAATCAATAAGCACCTGGCTACAGAGCTG	A // G	0.688
Affx-961023603	1	66891179	Subspecies	TGATGAAAACATAAAGCTTTCATAATGGTCTGAGC[G/T]CTTCATGAGATGGAAATTCATTTTACAAAGGAGGA	T // G	0.718
Affx-961023608	1	66967197	Subspecies	AGATGAAAGGATAGGTTTATCTTGAAGTAAGAAAG[C/T]TACAACACAGAGAATGAATTTTAAAAGAAGAATGA	T // C	0.744
Affx-961023609	1	66975622	Subspecies	AACATGAATAACTTGTTCTTTAGGGATGTGTGGGG[A/G]TGTGGTGAGCTCACATGTCCAAAGACAATGATGAC	A // G	0.702
Affx-961023611	1	67000120	Subspecies	GTGAATAAGAAAAAGATGGAACACTTCTAGAAGGG[C/T]GATGAGAATAATCTGTAACATTTTATTTATTGTAA	T // C	0.684
Affx-961023612	1	67003164	Subspecies	TGTGAGGTTATTGTGAGGAGTTTTGCTACCTTAAC[A/G]ATATTGTCTCCTGATCAGTGAACATGAAGTGTCTT	A // G	0.704
Affx-961023613	1	67006087	Subspecies	ATATGAGTTTTAGGGGGACACAACTCAACTCATAA[C/T]ACTTGCATTCCTGGTGTTATTTCAGTTTTTCTTTG	T // C	0.666
Affx-961023614	1	67035122	Subspecies	TCAAGATTGCCTTTGCTGTTCTTGGCTTTTTGTAT[C/T]TCCATATGCATTCTAAAAATCAACTCATCATTTTC	T // C	0.732
Affx-961023615	1	67054529	Subspecies	TTCTTTCTCAGAACTATTTTTTCTATCAACAATAA[A/G]AAGACTGTGGTAGGTAAAGCATACTATTTGGGGAA	A // G	0.654
Affx-961023616	1	67062733	Subspecies	TAGAGTATGAAGACTGATTCATCAATATCTTACCA[A/C]GGATATATCTGATGATCAAATTTTATGATTATCAG	A // C	0.688
Affx-961023620	1	67105541	Subspecies	AAAGGGGTTCAAGTTAGAAGTCTCTCCAATAGAGT[C/T]CTCAAGTGGAGCTGTGTTCATTTTGACTGAGTTAC	T // C	0.68
Affx-961023621	1	67113082	Subspecies	GACAGAACAAACCTGCTCCATGGTATGAAATAGAT[A/G]TAAGAGCATGGCCTAAGAGTGAGGATGCCAGGATC	A // G	0.708
Affx-961023623	1	67150369	Subspecies	TTGTTGGGCATTTATCCTGGAGAAATGAAAACCTA[C/T]GTTCACACAAAAAACAGTACATGAATATTCATACC	T // C	0.736
Affx-961023625	1	67201339	Subspecies	GAAGCAGTCAGAAAAATTCAGGAGACTAGATGAGA[A/G]AGTTAAAGGGGACGTGTCTGTACATATGAGAGTGC	A // G	0.688
Affx-961107730	1	68106593	Parentage	GAATTTAACTTCTGAGCTTTCTATTCTATCCCATT[G/T]GTCTGTGTGCTTGTCTTATACTGTGATCACACTGT	T // G	0.74
Affx-961023663	1	69390191	Subspecies	GTTGTGGGTTCACTTTCAGACCACTGCAATAAACC[A/G]AATACCAAAACAAAGTGAGCCACATGAATCTTGGT	A // G	0.64
Affx-961023664	1	69393420	Subspecies	TTTTGTTTCCTTTGGAAATGATACCACTGCCTTTA[C/T]GAAGCTGTTTTAATTCTGGGACATTTAACAACTTT	T // C	0.704
Affx-961023666	1	69413900	Subspecies	TGATAGAGAAAGACTGAGGGGAGCCATCAGAAATA[A/G]TAGTCACATCCTCTCAATAGTGCTGTTCTCAGCAA	A // G	0.676
Affx-961023667	1	69419392	Subspecies	TCTTGAGCTTTCACGGTCAGTATTATCTTCAAACT[A/G]TAGTTTCTTTGAGGAACCTTGTTAAGCCACATGTC	A // G	0.786
Affx-961023670	1	69538513	Subspecies	TCCCTCAAAATATCTATCATATCACCCTGGTCAGG[C/T]GCTGCTTACCCTTTATTTAAATTCTTTAAGTAGCC	T // C	0.66
Affx-961023671	1	69551344	Subspecies	TCTAACATTTTCCTCCTGTACCACCATTGGGACCA[C/T]TCATTTATTCAATAAGCACTTACTCGGCACCAGAC	T // C	0.648
Affx-961023673	1	69575219	Subspecies	CAGCCCTGCCCACAGCTGACTTCACAATCGAGAAG[G/T]CAAAGACTGAGCATGGGAGAGTTTTTGTCCTAAAG	T // G	0.62
Affx-961023674	1	69582066	Subspecies	TAATATCTGACTTAACTCATTTGCTTGCTTACTAA[C/T]GTATCCTTTCAAGCAACAAATGTTTATTTAGTATC	T // C	0.726
Affx-961023679	1	69635216	Subspecies	CATTTCTAACAAGTACCCAGATGATGGTTATCTTG[C/T]TGCTCTGGGGACCACAGTTTGAGAACCTTAGATTA	T // C	0.652
Affx-961023680	1	69638873	Subspecies	GTGTAAAAGCTATGACTTAATAAGCAGGAAACAGG[A/G]TTTGCACTATGCATTTGGGACTTGAATCAGGCTAA	A // G	0.676
Affx-961023681	1	69642611	Subspecies	GCATTGATTGTAAGTTATTCTATGTTGGAAGGGAG[A/G]ATAGCACAGAATAGCAACTGGTAACCCTAAGTTTT	A // G	0.766
Affx-961023694	1	70502638	Parentage	TTTTTTTTTTAATTGGGGAAGTATTCCCTTTACCC[C/T]TATTTTCTGAAAATCTGTGTAGAATTAAAGCTTTT	T // C	0.728
Affx-961023717	1	71539073	Subspecies	TTTCCTAGTTATGCCTTATTGTTATGTGTCACACC[C/T]TAAATCTAGCAGTTTCAAAAGCTGGTACTAAAGAA	T // C	0.774
Affx-961023722	1	71676317	Subspecies	AATAGGGAATTCCCTGGTGGTCCAGTGGTTAGGAC[A/G]TTGTGCTCTCATTGATAGGGCCCAGGTTCAATCCC	A // G	0.644
Affx-961023723	1	71677023	Subspecies	CCAAGGTCTCCACATCGCCTCTGGAGTTAGGTTTC[A/G]ACACATGAATTTGGGGGGAACACTTTCAGACCATA	A // G	0.658
Affx-961107909	1	71863851	Parentage	TAGTTTTCCATTGTCAGATTGCACACATTGTTGCA[A/G]TTGTGAAATCTATGCTAAATTTAATAGTTGTTTCT	A // G	0.736
Affx-961023776	1	73781761	Subspecies	CTGGTTTGGACCTTGGAGGCCACATGAGTAAGGCT[A/G]CTTTCTTTATCCCAAGTTAGCCCTTGACATATATT	A // G	0.698
Affx-961023777	1	73792845	Subspecies	CAGAGGAAGAGCCAGGGCAGCTGGTCCCCACCTGT[A/C]AGCCCCTCACGGTATGGTCACTACAAGACTACAGG	A // C	0.686
Affx-961023781	1	73921254	Parentage	AATGTCTTTGTATTAGTCACTCAGTCATGTCTCTT[C/T]CTGACCCCAGTGTCTTTCACAGCTATTAAAATACA	T // C	0.636
Affx-961023785	1	74071823	Subspecies	GAAGCCTGCCTAAACTGCCTCTGGTGAGTACCTCT[C/T]ACCCTCTCTCCTGTGCTCACAGGCGCCTGCACGTG	T // C	0.616
Affx-961108137	1	74664440	Parentage	ACTCCATGGCATGAATGCAGGACAAAACATAGAAA[A/G]CTATAATTAACAATGCTTGGTGGCTAGTGATAACT	A // G	0.746
Affx-961023801	1	74938954	Parentage	CGACTACGTGGTAGTTATTTGTGAAATATCATACA[A/G]AGAAAGGAAAATAAACATTTCTGAGAATGAGTTAC	A // G	0.686
Affx-961023818	1	75516633	Subspecies	AGACGATACTCCTATTAATTTGGAGATTTTTATCA[A/G]AGAGTACAACCATATTTTTCCATTTTGTAGCTTCT	A // G	0.698
Affx-961108220	1	75601724	Parentage	CTTCAGTTTTTCTGACTTATAGTTTTTTCATTGTA[C/T]ATGTGGATAGCAATGTTGGCCTTGTTTGGTTACCC	T // C	0.738
Affx-961108238	1	75818145	Parentage	TAGGTAAAGTGGAAGTGAGCTCAATTAGGGGTCTT[C/T]AAATGCAAACTAAGGCACTAGGTAGGTCACTTAAT	T // C	0.728
Affx-961023829	1	75889016	Subspecies	TTTAAATAGGCATCCTGAATTTGTTTTCATTTCCA[A/T]TTTTTGATGACATTAGGGATATTTAGTAGAAATGA	A // T	0.616
Affx-961023834	1	75955813	Subspecies	ATTGACTTAATAATCTATCCTAGGATCTTTACCAG[C/T]GTGTTATTACCCTAGTCCTTTTAGTTTGTTTCTGT	T // C	0.746
Affx-961023845	1	76392686	Subspecies	CCCACTTCAACTGGTACAATATAAATTCATCATAC[A/T]TTCCAAGACAGGCAGAAAATAACAATAAAAAACAA	A // T	0.674
Affx-961023848	1	76596425	Subspecies	AGAGTTCCATAGACAAAGGACGAAGATGATATCTT[A/G]TGAATAAAAAGAATTAAGCTCTGTTTTTGATGACA	A // G	0.766
Affx-961023850	1	76618459	Subspecies	AAAAAAAAGCTTTTAATTAAAAAATAAAATGAAAC[C/T]TAGGTCAACTTTTTAACATTCATATCAAACATTAT	T // C	0.748
Affx-961108309	1	76691534	Parentage	TACCAGAAATCAAATATTTTTGAATAGGAAAGAGT[C/T]TTAAAGTTAATTCTTACACCAAACATAAGAATATC	T // C	0.75
Affx-961108311	1	76780999	Parentage	TTTTGCCAGTGATAAGACCTGGCTTTCCAGAAAGG[A/C]AGCTGGAAGTTTAATATATCTAGGTGCTATAGACT	A // C	0.734
Affx-961023863	1	77271265	Subspecies	GATGGATAAACAAGGGGACTATTCACCAATAGAAG[C/T]TAGCAAAATACTCATAAGATGCTGTAATATGGATG	T // C	0.722
Affx-961023864	1	77272465	Subspecies	ACTTTATGCTGTATGGTACCTGTTTTTAAACAGAA[A/G]TATCTATCATAAACTCATTTCCTTATCACTTCTCT	A // G	0.736
Affx-961023865	1	77272981	Subspecies	ACACCTGGGCATTAGATCACCATGTCCTGTCCAGC[A/G]CTAGACAGGACTGTTCCCCTTAATTCTTGCTAATC	A // G	0.626
Affx-961023866	1	77273075	Subspecies	ATTGTTGGCTTAATTTGTATCTATCTTACTCATGA[A/G]TTTGAGCTTCTTTTTAGGATGAACTTGTTTCTATC	A // G	0.604
Affx-961023868	1	77273197	Subspecies	AATATATTTTATATTGAATGGATTTCTTTTGTGTG[C/T]AAGAGTTCCTTGTGTTGTGATGGTGCTAACCACTC	T // C	0.66
Affx-961023879	1	77690069	Subspecies	AAGTCAGGCAGATGGCAGGCAAAGTTAAGACACTG[C/T]ATCTGGTAATGTTTTATTCTCATGTTAAACATCAG	T // C	0.724
Affx-961023885	1	77905250	Subspecies	GGGCAGAATACATTTTCACTGAAAAATGAAGAATA[A/G]GACTAAACTGCTCCAGTTCATAAAATTCTGAAAGC	A // G	0.742
Affx-961023888	1	77992933	Subspecies	GCAGATATGACCATGCTTGTGATTATGATGTGTCT[C/G]TATAAAATACGCATATCTGTACTATAGAAAATGAC	C // G	0.776
Affx-961023893	1	78151404	Subspecies	CAGAGAGGGGAAGTTATTTTCCCATCAACAGAAAG[C/G]CAGTTAGTGACAGCAGCATGAGGACAAGAAGCCAA	C // G	0.676
Affx-961023894	1	78156549	Subspecies	CAGAGCAAAATATCTTGAACTTAGTAAATAATTGG[C/T]AAATTATTGATGAATTGATAAGAACATAAGCTTAA	T // C	0.69
Affx-961023895	1	78163811	Subspecies	AGGGCCAAGGGAATGTATAGGAGGAACAATAGGAG[C/G]ATGGTGGTGAGGGTGGCTCTGGAAGTCTGAAGGAG	C // G	0.706
Affx-961023896	1	78164108	Subspecies	CCCTGGCAGCTTGACTGGAGTGACTTACTTAAAAA[C/T]GTTTTGTTCACACAGTATGTTCTTAACATGTATAA	T // C	0.618
Affx-961023900	1	78229238	Subspecies	ATATAGACACAATACATTAAAGTTTAGAAGAGAAA[C/T]CAGCCCTACCTGTTTTCAATATCCACCATCTTCTT	T // C	0.69
Affx-961023902	1	78290087	Parentage	AAAATCCTGGATTTTACATTGCATTCTGTTGTTCT[A/G]TTTCTTTAGCCTTTATTAATCAGGAACATTTCCTC	A // G	0.728
Affx-961023905	1	78373879	Subspecies	GTTTAGATCCTTGCTACTTAAAATTCAAAACATGC[A/G]TTCTACAGACCAGTAGCACAGAGTCACCTGACAAT	A // G	0.688
Affx-961023908	1	78408217	Subspecies	AAAAACCAAAATATTTTTCTGAAGCTTTATGTTCA[C/T]CACCAGGCCACTTCAATTCAGCTGTGTATGATAAA	T // C	0.686
Affx-961023909	1	78408721	Subspecies	ATGTGTATATGTTTTCTAGATGACAGTGAAATTCT[A/G]AGAATAGATTTGATGTAACTCAAGAGTAGGTTAAG	A // G	0.74
Affx-961023910	1	78410487	Subspecies	CAAAGTTTCCAATCAGTTTTCAAGTGTCTGCCATC[A/G]GACAGAAGTAAACTAAGTCACACTAGTCCTTTATT	A // G	0.726
Affx-961023912	1	78411028	Subspecies	TAAGTGAATTGAAAGATTCATGTTTTGGTCATGGC[C/T]GTGTCTTCTTAGGTAACTTTCCCTGTTACTCTGGG	T // C	0.702
Affx-961023913	1	78412241	Subspecies	ATTTGATTTTTCACTTTCAGTAAAGTCAATAAATG[C/T]ACATGATATAGTCAACACTTTTTCATAAAATAGAC	T // C	0.702
Affx-961023914	1	78413872	Subspecies	GCCTCCAACTCTGAAATAGTAAAGTGAGATATGCT[G/T]ATTCAGTGTCTCCTGGCTTGAGGGTAATGAGAGAT	T // G	0.72
Affx-961023915	1	78419327	Subspecies	GACTCTGGGGAAGAGCAGCTTATGATCCTTAGAAA[C/T]CTGGCCAGATAACTTTAATACTAAGAATAATATTT	T // C	0.748
Affx-961023917	1	78427015	Subspecies	ATTCTTATTATTTGATATTGGACAATAGTTTTTAC[A/G]TATGTTTCTTAAAAATTATGAAAACAAAACATTGT	A // G	0.662
Affx-961023920	1	78450927	Subspecies	TCACCAAATCCAGAGTACTATCTATTCTTTTTGGT[A/G]ATACCAAGCTGTAAACAATGTAGCATGGACCTCAG	A // G	0.676
Affx-961023921	1	78451176	Subspecies	AACCAAATGTGTGATTAAAAAGTTGAAACTTTCCT[C/T]GCTACCTCTGACCTCCAAGGAGGGACAGGGGCTGA	T // C	0.714
Affx-961023922	1	78451441	Subspecies	GAATAGTACATAATTTCCAATTCTATAAAATAGCA[A/G]AAGGGAATTGTATTAGTCAAGGTTTTTAAGATCAT	A // G	0.712
Affx-961023923	1	78453056	Subspecies	TACTGTGTCTCAGTAATGTCAACCACAGAGTAACT[C/G]TTTTAAAAGTCAAGTATTTAATATAATACACAAAG	C // G	0.702
Affx-961023924	1	78453406	Subspecies	TTATTTCCATGCTTGGTAGAGTGGCTGGAAGTAGA[A/G]GATTTTTCCATAAATGAGAGTAAGCACACTTTGTG	A // G	0.686
Affx-961023925	1	78453697	Subspecies	TTATTCACCCTAAAGAAAGCAAGGAAATATTAGGA[A/G]AAAATCAAGAACAGATTACTAAGATAGTAGTCTTA	A // G	0.652
Affx-961023926	1	78454249	Subspecies	ATTGGAGTGATGTCATGGCAATCATCTTGCAACCA[C/T]GGTATCATAAGCATGAATAAGAAAAGACAACATAC	T // C	0.684
Affx-961023927	1	78457890	Subspecies	TAAACAGTTTTATTAAAATTCTTTCTACAAGTTTA[C/T]ATACTTTAAAGCACAATTACATAATTTCAAAATTA	T // C	0.726
Affx-961023928	1	78458619	Subspecies	TTATACATATGATTTTAATTTTTCATCAATGCCAT[A/G]AAGTATTATCAATTCCATATTATAGTCAAACTGAG	A // G	0.652
Affx-961023933	1	78460835	Subspecies	AGCAATAGGTTTTTAACAATGAAAAATGAAGAGGC[C/T]TGCCAAAATTCCATCCAACCCTGTACACTTACTGG	T // C	0.7
Affx-961023935	1	78461103	Subspecies	GAGGCTGAGGCCATGCTGTTATTTAGGAAGCCTAT[A/C]GGGTTCATCTCACAGTTTGGCAGTGATCCAAAAAC	A // C	0.704
Affx-961023936	1	78461312	Subspecies	TGCCTAAAGTTGACCTTTTCCTCTCGTAGCATGTC[A/G]CAGGAGGGGCCAAACATCAGAGTTTCCAGGTTTTT	A // G	0.606
Affx-961023938	1	78461845	Subspecies	AAGCTGCTCTCCTCTTGGTCATCTCAACTAACAAA[C/T]GAGGGCCCAACAGACTTATTGCTAAGAATTTATTT	T // C	0.656
Affx-961023942	1	78466921	Subspecies	ACCAACATGGATAGCACATAGTCAAGCAGAAAGAA[A/G]CTGGATAGAAAGTCAAGGGAGAGACAGCTTTGTCA	A // G	0.75
Affx-961023943	1	78468105	Subspecies	TCCATAGCTCTTCCACAGGTCCCAGCTTTCATTAT[A/G]GTCACTACAGAGTTTCTGACTTGTACTTGCCAGGT	A // G	0.678
Affx-961023945	1	78469925	Subspecies	AATTTTAGCCACTTTGCTTAATCTTGCAACTAGTA[C/T]AATACCATTTTCTTAGGCTGTTTATTATGTAGATC	T // C	0.684
Affx-961023948	1	78470754	Subspecies	ATTTAGTTCAAGTAGAGTCGCTAAGGAATACATAA[C/T]TGAAGTTGCAAGGATGATTTTGAAGTTGTTATTCA	T // C	0.734
Affx-961023952	1	78471876	Subspecies	AACTATCGCTATCTTACCCATAAAACAAAACATAC[C/T]ACATCAAAAACAAAAAATTGAGATTAAAAAAAAAG	T // C	0.738
Affx-961023954	1	78477010	Subspecies	CAACTGAGGTGACTTAGCAAAAGGTAACACTATAG[C/T]TTAATTTTCCCAAACTTCAAATTCCTCTTCCTTAA	T // C	0.736
Affx-961023955	1	78478013	Subspecies	ACAGGCTGAGTTTCAGTTGTAACATCTGCAAGGAA[A/C]TGTTCTTTTGAAATGCAATGTCATATTTCTAATTT	A // C	0.738
Affx-961023956	1	78478192	Subspecies	TTTCCTGCTAGTGTATTTCTCTTATAGTTGAGGAG[A/G]AGCTTTGCTGAGTAGGGATTTTATTTTTCCTGGAT	A // G	0.67
Affx-961023957	1	78479094	Subspecies	GAGGCAATCTGTGGGAGGTTCCCAGAAGCCTTGAT[C/G]AAACTGAGTAACCAGAGTAAAAAAATGTTTCCACT	C // G	0.702
Affx-961023958	1	78479880	Subspecies	GTGTTGGAAATGAGAAGTTTCAATGAATAAAGATA[A/G]CCATATCAGTTCAGATCTGTTGGAGCCTTCTTCTT	A // G	0.756
Affx-961023960	1	78481914	Subspecies	TCAGACCCTCCCCAGTTCTCCATAGCAGTTATGGT[A/G]ACATTCACCAACATGCTTTCAATCAGAAAGAACTA	A // G	0.682
Affx-961023961	1	78483978	Subspecies	GGGAACTTCTGGATCATAAAACATGTTTATTTTCA[A/G]TTTTACTATAGCAAGCATCTTTTTTTTAGTGCCAT	A // G	0.69
Affx-961023964	1	78489225	Subspecies	TGTAGAAAGCAGTTAATCATGCGGACTGAAGATGA[A/G]AGTCATACTGGACAAGGAGATGTACAGATTTCCAT	A // G	0.686
Affx-961023965	1	78490216	Subspecies	TACTAGTTAATAAAACATTGTGGATTGCAGGAAGC[A/G]TGAGATTTTAGTCCAAGGAGCTTTGAATTCCAATC	A // G	0.684
Affx-961023966	1	78490796	Subspecies	AATAGAGTAAGGGTGGATGGAGCCCGATCCTTTTA[C/T]CCCACATGTCACAGTAGAACCTGGGAAGAGCAAGC	T // C	0.654
Affx-961023967	1	78491880	Subspecies	TGCTTTAAAAAAATGTCAGGTTAGTTGCTTGTCAG[A/G]TAAAAGACTGAGGTGGGGAGAGAGAATTATAAAAG	A // G	0.712
Affx-961023968	1	78494621	Subspecies	CTCTCCCTGCTCCTGAAAGTCAGCATAGCAATGTT[A/G]AGATTATTAGGCAGTGTTCCCAATGTTATGGAACC	A // G	0.752
Affx-961108432	1	78666903	Parentage	TTAACTTCAGTAAAGTTTTGATAAATGAATGGTTT[C/T]GTGGGTTAAAATTATTACAGTCAATAATAAACTTC	T // C	0.762
Affx-961108433	1	78676802	Parentage	TGTAACTATGTTCAATAGCTGAAATGACTTTTTAA[C/T]TAAAAAATTGAAGACTATTAATTACTTAATGTTCT	T // C	0.74
Affx-961023972	1	78677693	Subspecies	CACCAGCTTGGCTCTTCTCAATGTTTTCATTTAAT[C/T]CTCTATAGGGTGGATATTATTAACTCCAAAATATG	T // C	0.698
Affx-961023973	1	78679618	Subspecies	TGGTAATTTTCTGTGTAACAGTATGATGATTTGAC[C/T]GCCCCCTTGACTGTGAACTCCATGAAGGCAGAAAC	T // C	0.734
Affx-961023976	1	78751210	Subspecies	ATATATGGCCTTAAAATAGTATGAGAGATTCTGGT[A/G]ACTTGACAATGAAGAAACAATGATAACACAGGCAA	A // G	0.684
Affx-961023981	1	78851128	Subspecies	AAATTATAGGAAAAATTCCTGCAATAAAAGATGAC[A/G]TTAAAGCTGCAAATTCCAATCAGTCAGGTCCCAAG	A // G	0.712
Affx-961023983	1	78915634	Subspecies	GACAGGGTGGGAGCCAAGTTTTCAGTTTATATCTG[C/T]TGACACTGTATGGATTTTTGAAACATATTACTGTG	T // C	0.66
Affx-961023993	1	79319584	Subspecies	CAAGAAAAAAGTATGTTCATATAAAGGCTTATACA[C/T]GAATGCTCATAGCAGCTTTTTTCATAATTTAAAAT	T // C	0.712
Affx-961023996	1	79327945	Subspecies	AACAATGTGATCTCAAACAAACTGCCCAAAGACTT[A/G]ATCACCATAAAGTGCAATACTAGAAAAAGAGAGGG	A // G	0.684
Affx-961023997	1	79448092	Subspecies	TGGACTGAACTATCTAAATAGTTAGAAATGTGATG[C/T]TAATTTTATATATCGGTTCATCATCCTCACAACTT	T // C	0.776
Affx-961023998	1	79451023	Subspecies	GGCTGTGCACAGACAGTTTACATTAATGCTGCTCC[A/C]AAGAGGAACTCTTATTTTCATGAAAAGGTTGCCAT	A // C	0.688
Affx-961024000	1	79455316	Subspecies	CACTAAAGGAAACACAAGCCAGACTACCATGAACA[G/T]GGCTGTACTTTCCAAACAGTAGCAAGGACTAAAAA	T // G	0.708
Affx-961024001	1	79456903	Subspecies	CAAAGCAATGAGTCCATTGTGATATGGAGAAGGAT[A/G]AGCTAGGACAAGGAAAATAAAGAGACTAGAGCAAA	A // G	0.76
Affx-961024002	1	79457241	Subspecies	AGACATAAGTGGAATTTTTGGACCCATTGAATGTG[A/C]AAGTGTTCCCTTTGGAAAGATTTTCTATGGATAAA	A // C	0.69
Affx-961024003	1	79457585	Subspecies	CCTAGTAGAAGTACAAAGAACTTCTCAGCAAATTA[A/G]TAATCATTAGGGAATTTGGAGGGGGGTGGGTAGAG	A // G	0.738
Affx-961024007	1	79464523	Subspecies	AGACCATAAAGCATTTCAGAAATTTCTTCAGAAAC[A/G]GATTTATAGACGAAGAATACAGACCTAGGATTACC	A // G	0.754
Affx-961024008	1	79465294	Subspecies	CAGATAACAGGCACATAAAAGCAAGCCACAGTCTA[A/G]GTCACAGAGAGAGACAGGGCGAGGAGGTGTCAGCT	A // G	0.664
Affx-961024010	1	79465991	Subspecies	CCCCACCCTGTACCACAACATAAGACTTAGATTGC[A/G]CTTCTGATCAAAGCATGATGACTAAGTAATAATTT	A // G	0.712
Affx-961024011	1	79467190	Subspecies	GTGATTACATTACTCTAAGCTCCACTGTAGCTCAA[A/G]TATGAAGTTGGGGCAAATATGGCCAGAGTGGGGCC	A // G	0.676
Affx-961024012	1	79468065	Subspecies	GTTGAATGAATGAATCACGTCTACCTTTGTCTCCC[C/T]CAGAATGAGATTTAGGAGAAAGTCATATAACGAAC	T // C	0.656
Affx-961024013	1	79535390	Parentage	GTATAACAATATAATATTCAGGCACTAAGATCCCT[A/G]TCACTAATATTAGAATTTTTACTGTTTATCAGTAT	A // G	0.672
Affx-961024015	1	79661258	Subspecies	AAGATGGTTTGAGAAAGAGTCTCTGAAAATACAAA[C/T]CATGGGATGGTGGACGTAGGAGGAAAGAGACCGAT	T // C	0.706
Affx-961024016	1	79662706	Subspecies	ATTCTTTACCACTGAACATGGGAAGCCCCGTGTTC[C/T]ATCATTATCCCCCAGTTTATAGAAGAGAGAGCTGA	T // C	0.716
Affx-961024017	1	79662769	Subspecies	AGAGCTGAGTTACAGAAAGTAAGCAACTTGCCTAA[A/G]GCCGTGTGGCTACTAAGCAGAGGACTCTGGATTTA	A // G	0.708
Affx-961024018	1	79662900	Subspecies	TTGAATCCATCATTTGATTAACTCCAAAAGGTAAA[G/T]GGCGAGGGGACCCTGTTCTGGCTCCTGGTGCACAT	T // G	0.674
Affx-961024019	1	79663642	Subspecies	AATAAATAACCACAAAGAGAACAACATAGGGTGAA[A/G]GCAGTAATAAACCAGAGCCTCTGGCTCAGGTTAGA	A // G	0.736
Affx-961024024	1	79682508	Subspecies	GAACTGACTGGCTGTTCAGCTCAACAGCACAGTAA[C/T]TGTCAAGGCCCCCTCCCTTTAGTTGGAGAGTCCAG	T // C	0.702
Affx-961024025	1	79682924	Subspecies	GTTTCCTTATCTGTAGAGTGGGAATTAGACTGTAC[G/T]TGTAAATATCTTCTTTTCTTCTAAGGTTAAGAATA	T // G	0.744
Affx-961024026	1	79682968	Subspecies	TCTTCTTTTCTTCTAAGGTTAAGAATAATGTACGC[A/G]TGCAGCAACATGGATGGCCCTAGAGATTATCCTAC	A // G	0.68
Affx-961024027	1	79697761	Subspecies	GCCTCTCTGATTTCTGAAGGTCAGAAAGTCAGGCC[C/G]TTACATATAGGATAACTATAGTTCCTATTCTAGCT	C // G	0.696
Affx-961024029	1	79703487	Subspecies	CGCCCCCTACCCCCGCCCCATAGGGTCCTGGTTCT[C/T]CAGTCACTGTCCCTGTATCTTACAGCTGAAAACCA	T // C	0.706
Affx-961024030	1	79705901	Subspecies	AAGGCTTGGAGGAAGAGGTGCATTTGAGCAGACCT[A/G]TAGGAACCAGTAAGCTCTATTTGCCTTTAGCCAAA	A // G	0.664
Affx-961024031	1	79706960	Subspecies	TAGAGTGGTTTCTAGCCGTCACAAACTATTAAGGA[G/T]ATTGGAAATGAACATTTACTGTGCACCAACTATGC	T // G	0.728
Affx-961024033	1	79709423	Subspecies	AATCAACATGATGCATTTGACAACAGTAGACTGGT[A/G]AAAAATGAAGCAGAGACTGAAGCACATGTGGAAGG	A // G	0.75
Affx-961024037	1	79763042	Subspecies	CACTCATCCATTAAACAACAGGGACAAGATTGGGG[C/T]ATTTCCACAATCCTTTTTTTTGACCCTCACTGGGC	T // C	0.73
Affx-961024038	1	79763440	Subspecies	TGGAAAAACTGGTGAAATCTAAATAGAGTCCAGTT[A/C]CGTTAATAGTCATGTACCAACATCCATTTCTTAGT	A // C	0.792
Affx-961024039	1	79764482	Subspecies	AATGCTTCTGTATTTTTTAGGCAGGCCTATATAAC[A/G]GGAAATCCAAACAACTAATCACAAAGACCAAGAGA	A // G	0.736
Affx-961024047	1	80096939	Subspecies	CTTAAGAAAGATCAAACTTCAAACAATGTAAAATG[G/T]AACAAAGTACTTTGTAGTATAGTTTTACAATTTTT	T // G	0.738
Affx-961024049	1	80109779	Subspecies	TGGATTTAGAAAACTGTGGCTTAAATTTCTTTAGC[A/C]AAGTTAGCCTTAGTTTCCTCATCTATAAAATGGCT	A // C	0.606
Affx-961024052	1	80120593	Subspecies	AGGTTTGGACTTCCACACAAGAGCAAAAAGAAGCC[A/G]CTGAAACTTTCTGACTTGGAACATTGGCTTAAGTT	A // G	0.704
Affx-961024053	1	80121048	Subspecies	ATTAAGGCTGGGAGACCACTTAGAAAGTTTCTGCA[A/G]CAATTCAAATGACAGCTAGTGAGGCAGAAAGAAGA	A // G	0.664
Affx-961024054	1	80122165	Subspecies	GAAGATACAATTCCTACTTTAAAGAGTTTACATCC[C/G]AATTGAGGAGAGGAAACACACACACAAAAATCACA	C // G	0.708
Affx-961024058	1	80130254	Subspecies	CCAAGCATGGGGATAAAACGAAGCAGAAAAAGACT[C/T]GAGTTTTCAAAGGGTAAAAAACCACCTGGAATAAA	T // C	0.678
Affx-961024059	1	80139020	Subspecies	CCTTAAAGAAAACCGAGTGGAAAATACCTATCTCC[A/G]TGGGGCTATGTGAGGATGGAGAGTGAGGCAAGGAG	A // G	0.65
Affx-961024061	1	80146984	Subspecies	ATGTAGGGACTGCTTAGTCTAGAAGGTTCTCAAAG[A/G]GGAGTCATTTGCTCCTTCTTTCAGCATTTACTCAC	A // G	0.694
Affx-961024062	1	80147378	Subspecies	AAAGGTAACTCAAGCTCAGGGAATGACCAACAAAA[A/C]ATTCAGAGGTGACCAGTAAGGTAAGCCTGGTGCTG	A // C	0.798
Affx-961024063	1	80148239	Subspecies	ACGCTGCATCTATCAGAATCCACGTTCTATTTTTT[G/T]GTATTTAAATGTTACCCTAACCTAAAAAGTAGATA	T // G	0.74
Affx-961024064	1	80149669	Subspecies	ATAAGATTTCTTTAGGGAATTTTCCAGTCCTAAAA[C/G]TGGATTAGGCACCCAAATCTATAATTTTTCTTACC	C // G	0.69
Affx-961024065	1	80149819	Subspecies	AAAACTATGATATTGACCTGAATTTCATATGTTCT[C/T]TTGAAACTCAAAGGTGATTAGATCAAGTTCTTCTC	T // C	0.69
Affx-961024066	1	80150227	Subspecies	GGTAGAAAGTTCCCAGCCTGGAGATATCTAAGAAG[A/G]AGCATGATGGACACTTTATTAGGGGTATCATGTAG	A // G	0.688
Affx-961024068	1	80152032	Subspecies	CCTGGAGACCCATTTCATTTTGTGCAGAGGCCTGA[G/T]GCTGTTGAAAACTAGAACTAAAACTATAATTAATG	T // G	0.702
Affx-961024069	1	80152071	Subspecies	GTTGAAAACTAGAACTAAAACTATAATTAATGAAA[C/T]GATAGTCTTCAAATAGTTTTAAACCTACTGTGTTG	T // C	0.728
Affx-961024070	1	80152122	Subspecies	GTTTTAAACCTACTGTGTTGGTCCTCTGAACAGCA[C/T]ACCAGAGTTTGAAGGGAGAAGTATGAATATTACCC	T // C	0.738
Affx-961024071	1	80174433	Subspecies	AAGTGGTTTTGTTCCACATCAGATAAGGAGTTCCC[C/G]GCAGAACTGTAATTAGACACCAAGGTCTTCTGGCA	C // G	0.686
Affx-961024072	1	80179843	Subspecies	TTATTTTATTCTTGTTGTCTTTGAGTGAATTGGCC[C/G]GTTTGGGGAGGCTTTTGCCACCCTCCCTTGTGTTG	C // G	0.67
Affx-961024074	1	80240492	Subspecies	TGATAAGGCCTGAGACCATCTGTAAACTGACATCA[A/G]TTATGAGTGTAGGTTCATGAGGTTGGAGGACATTC	A // G	0.674
Affx-961024085	1	80845214	Parentage	AGGTCAGTATCCTAAGACAAATATAAATAAAAGCA[A/C]AAATAAACAAATGGGACCTAATCAAACTGATAAGA	A // C	0.652
Affx-961024100	1	81698357	Subspecies	CAGAGGGACAGACAACATGGATGGGAATTCTATCT[C/T]CCCCCAAAAGGGAAGAAAAGTAGGGGATTTTATGG	T // C	0.674
Affx-961024101	1	81701004	Subspecies	ACCAAGTCTCTTTCACTTTTTCTAATTGCCAGTGC[A/G]TTAGGAGGGAATTCAGTCCCACCAACAAAAAGCAC	A // G	0.652
Affx-961024103	1	81710593	Subspecies	TTAAAAATTTAAAACTTGGGAGAAACTACAAAAAT[A/G]TATTAAATATCTGAAAATTCTGATTGGAATTAGGC	A // G	0.712
Affx-961024104	1	81710708	Subspecies	ATGCTTGCCTGTTAAAAAGAACAACTTCTACTTCC[C/G]ATCCTACTCCCTTCCAAGTAATAATGTACCAAGTC	C // G	0.718
Affx-961024109	1	81721226	Subspecies	GACAGGGTTACACTCCTCACAGCATTTTTTTTAAG[A/T]TTTTTTTTTCATGTGGACCATTTTTACAGTCTTTA	A // T	0.612
Affx-961024113	1	81815250	Subspecies	ACATTTTAAATGGCTACAGTCTGGACCAGGAAATA[A/T]GCACAATCAGCCTGTAGCATGTTGTTATGCCAGAA	A // T	0.672
Affx-961024134	1	82578721	Parentage	AAGGATGGATTCTAGAATTTTGCCTTATGCAGCTT[A/G]GATGGATGGTGATGCTGTTCATTCACTAACAACCA	A // G	0.656
Affx-961024161	1	83696697	Subspecies	AATCAAGCATTTGAAGAGAGTAGTAGTATATCCAG[A/G]GCCAAAGAGTTCATAAATTTCCAATGTGTGCTCTT	A // G	0.694
Affx-961024167	1	83868065	Parentage	GGCAATAGAACAAGAAATAGAAAAGTAGATTTGCA[A/G]TTTGCCATTCAGTAGTTATTTGCTAAAGGATAAAG	A // G	0.688
Affx-961108930	1	84027751	Parentage	CAGTCATGCCTGAGCCTCACTCAATTATTCAATTT[C/T]CTATATAGTTTTTACCTAAGTGCTCTCAGTTCAGT	T // C	0.732
Affx-961024236	1	86228524	Subspecies	TCTTAATAAATCAGACTATTCATTTTATTCAAGGA[C/T]CACTTCTATTTTTGAAAGCAAACATAGCTGATTCT	T // C	0.734
Affx-961024237	1	86232669	Subspecies	GGTGCTTAGGCCTGAATTAGGGTGAGGTGAGTGAG[A/G]CTGAGTCATGCAAATGCTGGGTCAGAAATGATCTG	A // G	0.67
Affx-961024238	1	86235417	Subspecies	GTAAATAGAAATACTGTGATTTACATATTATTTTA[A/G]CCTAAAGAATACATGTGATTGATTTAATCACAGAC	A // G	0.69
Affx-961024240	1	86239100	Subspecies	TACCCATTCATCTGTTGATGGATGCTGATGAATAA[C/T]GCTGCTATGAACTTTTGCTAGTATTTGTTTGAATC	T // C	0.63
Affx-961024241	1	86263229	Subspecies	ACCATTTTGGAGTGTGTAAAATCAGCCAGATGCCT[C/T]ATGCATTTTATTTAACTCTGAAAAAATTCTATGAA	T // C	0.716
Affx-961024243	1	86267081	Subspecies	CTCTCTAACCTCTTAGATGTTACGAAAGAGAAAGA[C/G]GGGCTTCTTTCTTAGGAAAACTGAACTCAGATTGT	C // G	0.674
Affx-961024244	1	86281528	Subspecies	AATATCACTATTCCCTAAAGTTCTACCCTAAAGCA[C/T]GGGTAGAACATACTATAATTTTTTAAATCACTACC	T // C	0.676
Affx-961024248	1	86318841	Subspecies	AACTGAAGATAATAAAGTTACTAAGTATCAAAATA[C/T]GTAGGATATGGTGCCATGCTTAAAGAAAATTTAAA	T // C	0.708
Affx-961024250	1	86324542	Subspecies	CTATATAGGGCAGGCTGATTTGTGTAACTGACTAG[C/T]TCTAGAAAGTATGTATTACTGTCATAGTTTGGGTT	T // C	0.67
Affx-961024256	1	86473792	Subspecies	TAAGATCTGAGCTGACTGATCAAAAGATTCAGTGA[C/T]TGGTTCAGAGGAGCATGTGATCTAAACAAGCCAAT	T // C	0.722
Affx-961024259	1	86499225	Subspecies	GGCCTTGCCTCATACTCTAAAGTGTTTGACACTCA[C/G]ACCCCTTCAGAAATCACTTCCTCCCTTACTTTTTG	C // G	0.704
Affx-961024262	1	86563425	Subspecies	GCACAGTGAAGGAAACCATCTACAAGATGAAAAGG[C/T]AACTTACTGAATGTGATAAAATATTTGCAATTGAT	T // C	0.656
Affx-961024264	1	86578649	Subspecies	GGATTCAGTGTTAGGTTAATGCTAGAAGTTAATAT[A/T]CCCCAATTTTAACCCTGCATCACAAAATTACAAAC	A // T	0.696
Affx-961024267	1	86620282	Subspecies	TTTGGGGATGTAGAAGCAGATGCTAGATAATGACT[C/T]TTCAGGCATCAGGTGAAGTGGAGAAGCTCTTTTGT	T // C	0.682
Affx-961024269	1	86665815	Subspecies	TAGGATCTCAGTTTTGGATAGTTTGTTAACAATAA[A/G]TTTCATTACAGTTTAGGGTTGCCTTGGGGATCCAA	A // G	0.76
Affx-961024271	1	86675776	Subspecies	TGGGTCAGAAGTCAGCTCTTGGCAATTTCCTATGT[A/T]TCAGCATAACCGACATTTTCAACTAGCAGCTGAAT	A // T	0.64
Affx-961024275	1	86728112	Subspecies	TATTCTAATACTCCTTAATATAGAAGCTATATAGT[C/T]TATGCTTAGCACTGTAAATTTTTCAAATCAATCAT	T // C	0.756
Affx-961024277	1	86770100	Subspecies	ATTTTATTGTGATGTCAATTCACCTCTCTGAGGGA[C/G]TACTGCTGTGCTGAAACCCAAAAAAGTTGATTCCA	C // G	0.654
Affx-961024282	1	86876690	Subspecies	TAAATGTTCATAATCTACTTAAAGCTGAGCTTCAA[A/G]TACATTTTGTATTTGTGCTTTGCCCAATATTAAAA	A // G	0.718
Affx-961024283	1	86878174	Subspecies	AGTAACTTACCACAATCTATAATTTGAATTAAAAT[A/G]TCTGATTCTAAAGTCCATAATTCTGGTTATTCTGA	A // G	0.768
Affx-961024289	1	87046201	Subspecies	TTTGCTTGTGTTTCTTTATTCCTTCTCTTGAGATG[G/T]TTCATCCATTTAATGTCATAATCACTGCATAAATG	T // G	0.71
Affx-961024291	1	87061974	Subspecies	AAACTGAATGTATGGAGATTAGAGTTCAGTCTTTG[A/G]TAATTTACAAACCTGACTTAAAACTCTGGTCTACT	A // G	0.704
Affx-961024292	1	87066938	Subspecies	TATGACACTGGCATATTACTTCACTTCTGTGCCTC[A/G]GTTTCCTCATTTGGAAAATGGGGATAAAGATAATG	A // G	0.61
Affx-961024293	1	87075668	Subspecies	TTTTGATTTATAGTTAGTGAATAGATAGAGGACTC[A/G]GTCTAAATATCATCTGTTTCTTATGATATAAAGCA	A // G	0.754
Affx-961024294	1	87075757	Subspecies	TTAAGAGGTGATGTTTGGCTCTCTGAGAGGTCTCC[A/C]GAATTAGCTTACTTTACATTAACTATTTAATAAAT	A // C	0.64
Affx-961024303	1	87232111	Subspecies	CTCCCCAGATTCTTTCAGGGCCATGAAAGTTTCTG[C/T]CCATTTCTGAACCTGTTGCTGTAATAAATTACAGC	T // C	0.682
Affx-961024304	1	87264283	Subspecies	AGAGAGACTCCCCACTTGTTTATAGGGATGTGATC[C/T]TTCCCCATCACCTTAAAGCAACATTAAGTAAGCAA	T // C	0.662
Affx-961024305	1	87275837	Subspecies	TCATTGGTTGTTGTGTCTTCAAATCCATCAAGTTA[C/T]CACGTTAACCTGGGAGGTCTTATTATGTACATATT	T // C	0.724
Affx-961024306	1	87275968	Subspecies	TATGTTAATTCATGTTATAGTCATATTAATCTTTC[A/G]AGATTGGCATTATTATGATCATTCCCAGATGGAAA	A // G	0.782
Affx-961024307	1	87278286	Subspecies	TCTGAATTACTCTAAGTCACTGATCTATTTTTGTT[A/G]ATACAATACAACACTATGACAATAATTTAAAATAC	A // G	0.742
Affx-961024308	1	87284667	Subspecies	GCCATTTCTACAAAGTACCAATACTGATCAAAAAT[G/T]GTGAAGGAAAGACAACTGTGCCTCATGGAGCAAAA	T // G	0.752
Affx-961024309	1	87285045	Subspecies	TATTTTCAAATTAAGAGATAAAAAGTAACCTAAAG[G/T]AGGTGGACAATGTAAATATCCATTTTTCATTTGAT	T // G	0.732
Affx-961109598	1	87302774	Parentage	AAAAACAAACAAATGAGACTGAATTACACTTAAAA[A/C]CTTTTGCACAGCAAAGGAAATCTTTGACAAAAGAA	A // C	0.736
Affx-961109612	1	87333013	Parentage	AATTTTGTTACTTCTATTTATCATCAAAGTCACAC[A/C]AAAGTGTGTGACAAAGTCACACCAGAATATTCTTT	A // C	0.744
Affx-961024314	1	87476104	Parentage	GATTATACATCCAAGGCTCCCTCCAGGTTCTGGAT[C/T]TCTAGGTCTCCTCTTTAGAAGAAGGCCACGATAAG	T // C	0.708
Affx-961024329	1	88030825	Subspecies	TCACCATGAGCTCCTTCCTGATGCGATGTGTTTGG[A/G]CCATGCTGCCTTAGCACTCCTGGCTACAAATCCTC	A // G	0.602
Affx-961024344	1	88575245	Subspecies	ATAAAACCACATGATCATTTCAATAGATGGAGAAA[A/G]AGCATCTGACAAAATCTGGCATCCATTCACGATAA	A // G	0.614
Affx-961024356	1	88909021	Subspecies	TCCCTACCAATCTATATCTATCTATATTTTTAAAA[C/T]AGATAAAGTTGTAGGGTAAAACTGAAAGCAAGAAT	T // C	0.662
Affx-961024363	1	89078426	Subspecies	GATATTCTGACGATTGTTTTTTGGACATGTGCTCT[C/T]GGTCACATAAAGACTAGCCAAGGGAGTTTGGTTCA	T // C	0.658
Affx-961024364	1	89095425	Subspecies	GAGACTGTACCTATCTCTACTCTGGAAAATAGGTA[C/T]ACAGGGTCTGTATCTGGTCTCTGAACTTCTTTCTT	T // C	0.672
Affx-961109853	1	89237977	Parentage	TCTTATGACAGTCAATATAAAAAGAATCAATAAGA[C/T]AGATTCTTCCAAAATCTAACAGAGATTAACAGATT	T // C	0.728
Affx-961024373	1	89465683	Subspecies	TAAGGCTTATTTGAGCAAAAATCTTAAATAATGAT[G/T]ACATGAACTACATAGCATGTATTTAATGTGTTTAA	T // G	0.604
Affx-961024374	1	89494517	Subspecies	GGTGGATTCTTAACCCCCGAACCACCAGGGAAGTC[A/T]CTACTAAACAGTTTTTACAGGACTCTTTTTGTAAC	A // T	0.69
Affx-961024378	1	89614110	Subspecies	TCAGCAGAAAATCTGGCTCCACGTTTGTGAGAGTT[A/G]TTTATGCTATTAAGAGGGCTAAATGTCACTTATAT	A // G	0.634
Affx-961024387	1	89914955	Parentage	AAAGTCTTACCCCATGGCTCTTAAAAGCATGATTC[C/T]TAACAGCAAGGGCTCTGCAATACTCACAATTGATT	T // C	0.642
Affx-961109921	1	89924272	Parentage	GAAATGTAACCAAATGGGAAAATATTTAATAAACC[A/C]ATAAATGAGTTAATAGTTGCACAAAACATAATTTA	A // C	0.728
Affx-961109990	1	90240622	Parentage	TGTAAAATCTTAATTGTGTCATAGCTCAGTAAAGC[C/T]CTCTCCTTTTCCCCTCCTCAGTTCTTGATCACAAT	T // C	0.748
Affx-961024400	1	90323418	Subspecies	GAACTCCTTGGATATATGGGAAAGGAGAAAGAATG[G/T]AACAAAGATGGGCCAGGCAAGTTCATTCACATGAT	T // G	0.698
Affx-961024411	1	90568403	Subspecies	CGTTTGTCTTTTTCATTCATTGGTTTTTGTATTAA[C/T]CTCTCCAATGGCCAGTAGAGTATCAGCAGTTAAAT	T // C	0.704
Affx-961024412	1	90574093	Subspecies	CCTGCTGCATTGATTTCTATCATCCAGAAAGGTCT[A/G]CAGTATGTAGAGGCAGAAGTTAGTATTAATGAGGT	A // G	0.682
Affx-961024413	1	90647702	Subspecies	TGATATTCAGGCTGCAGCACCTGAGTAGCTACAGT[C/T]CTATACCATGGACAATAGGGACTGAATTTTATGAG	T // C	0.682
Affx-961024414	1	90647832	Subspecies	CTGGAGACAGGCTTGGATTCAAGTCCTTCTTCTGC[C/T]ACTTCCAAACTGACATTGAACAAGTAGGATGTCCT	T // C	0.69
Affx-961024418	1	90751525	Subspecies	TTTCTTTATTCCTAACTTTCTGCCTAATTGACATT[C/T]GAGTGGCTTCTGGCTGCTATTCTGTCTTCCTGGAA	T // C	0.726
Affx-961024419	1	90752297	Subspecies	TAAGCAGGCCTGTGTGGTTACAAAGTTAGAGACAT[G/T]ATTTGGGAGAATTTATATAATGGATTGGTTACTTA	T // G	0.778
Affx-961024425	1	90836157	Subspecies	TTATAAAACATATTTTCCCACATCTATACTTTAAA[A/C]AAATTAAAAGCTCAAAGAAAATACCCAGTGACTTG	A // C	0.602
Affx-961024427	1	90855605	Subspecies	AAGACCCAAACCTTTCAGGAAGTTCTCTCATGTTT[A/G]CAAAACCATTGATGTTGAGAGTAGCTTTTTATGAT	A // G	0.654
Affx-961024429	1	90952649	Parentage	AATATATCTCTTCTTGATTTCCTTTAATTATTGCT[A/C]TCATGGTGTATTTTTCTCCATCCATTTAGGTTTAA	A // C	0.616
Affx-961024431	1	90978783	Subspecies	AGTACTAGGTTTCTATCTCTTGTAGTCAAAAGTCT[A/G]GGTGAATAAAATTGTGTAGGCAGAGGTATAGGAAG	A // G	0.712
Affx-961024434	1	91023916	Subspecies	TCCATGCACCCTAGCCTCATTCTTCTGTCCAAATT[C/T]TCTCTCCTAGTGCACAGATCCATTCACATTCTCAG	T // C	0.7
Affx-961024437	1	91066281	Subspecies	CTCCATGCAGAGAAAACAATGTTAAGTCTCAATGG[C/T]GGGAGACAGCCCACCAAATATGAGGGACCCAAAAG	T // C	0.64
Affx-961024438	1	91067058	Subspecies	TCCAACAATCTTTATAAAAAGTAAACATATAAGGT[C/T]TGAAAATCAGCCTGTAGGATGTAGCAGTCACTTTC	T // C	0.696
Affx-961024439	1	91079659	Subspecies	GGATATCAGTTGTGGCTTAAATCCAAATGATTATA[A/G]TAGGAATCTTGGTAAATATTTGAGTATAAAATTAA	A // G	0.762
Affx-961024441	1	91097499	Subspecies	GGATTGCATCACTGATGCATTGGGTATGAATTTGG[A/G]TAAATTTTGGGAGATAGTGAGGGACAGGGAGGGCT	A // G	0.684
Affx-961024452	1	91595055	Subspecies	GATAGATGGTGTTATAGCATATTTGCATGTTGACC[A/G]GTTGACCTATTAGGAAGGTAAATATTAATGGCAAG	A // G	0.704
Affx-961024453	1	91610306	Subspecies	TTTGTGGCTTTCCCCACTCCTTCCCCAGAGCAGGT[A/G]TGTATCCATCCCTCTTCAGCATGTTATCTCCTTTT	A // G	0.668
Affx-961024455	1	91640202	Subspecies	AAAAAAAATCAGAAAGAATTACAGGGTTTATAGGA[C/T]AATGATGACTCCTCAATTTTGAAATTCTCTATAAA	T // C	0.722
Affx-961024456	1	91645947	Subspecies	GAAATGAAAAGAACTAAGACATGCCAGTCATCTCT[C/T]TACAACAACCAATAAGACATCCATAAAAGAAACTG	T // C	0.732
Affx-961024457	1	91647217	Subspecies	AAGGCATTGCTTTTATCCGCTAGATAATTTATTAT[A/G]TGTTAATATATCTTGCATCTTCTGATTTGAAAGTG	A // G	0.768
Affx-961024460	1	91660108	Subspecies	AGAATCCTGGGGGCTTTTCTGAGGAAAGTGTCTAA[A/C]GAATGAATATAAGAGAGTCAACCAAAGAATGGAGG	A // C	0.664
Affx-961024462	1	91674646	Subspecies	AAAGGGAAAGGGTAGACTTCCAAGGCTTTCTAGAA[A/G]GTCTAGAGGAGTCTTGCAAGTGTTTATTGGCTGTA	A // G	0.706
Affx-961024465	1	91693792	Subspecies	ATCTTCCAACTCTTGTCTCCTGTGGATTCAAGATC[G/T]CATAAACTCTCAAGCATTGATGCGTGATGACAGGT	T // G	0.66
Affx-961110267	1	91843244	Parentage	CCAAAGGCTGTATTAGAATATGTTGGCACATCAAT[A/G]GGCATCTTTTACTCCATCTAATAATTTTAATAGTT	A // G	0.798
Affx-961110268	1	91872536	Parentage	GCATTCATACTTTCTGACTTCCCTGTAATTTCAAC[A/G]TAAACAGAGGATATCATTCTGAAAATATATCGTCT	A // G	0.76
Affx-961110271	1	91916009	Parentage	TATTTCATCTAACTTTTAAAAATCATTAAAACAAA[A/C]TTTCTTTTTCCTATCTATAGGCATGTTTTTAAAGA	A // C	0.774
Affx-961024474	1	92133270	Subspecies	GTTTTTATCACTATGACATGAGCCTTTTAAGACTA[C/G]AGTTTTTTTCTTATTAAAGTAGTCTAAAACTGCCA	C // G	0.692
Affx-961024475	1	92134259	Subspecies	AAGTCTACAGTGGCTAAAGTTTGAAAACCATTTCT[A/G]TAGGTGATAAGAAATCCTTAGAGGGTTTTGTAGAG	A // G	0.768
Affx-961024477	1	92151323	Subspecies	ATTTTATTAATGTTAAATTTACAGAAGTTGATATT[A/G]TATTGAGCCATGTAAAAGAATATTCCTGTTTTGGG	A // G	0.678
Affx-961024478	1	92166571	Subspecies	ATTCTTAGGTGCAGGTTATTTTGTCCTGCAGGGGA[C/T]GTTTAGCACTATATGCAGACATTTTTGGTTGTCAC	T // C	0.728
Affx-961024480	1	92205269	Subspecies	CAATTTAGGATTATCAAAAATGTATGAAGCATTGG[A/G]GAGGAGACAAATGACAGTAACTGCCATTTCAGTTT	A // G	0.652
Affx-961024482	1	92225234	Subspecies	AAGTTATCCATATTGCAACACCTAAATAAAACTGT[C/G]TCCTTAATTTATTGATGGCTTTTGTGTTTAACATC	C // G	0.73
Affx-961024484	1	92247429	Subspecies	TGAATCACACTGGTACCATGCAGTAGTTTGCAAAG[C/T]TTATTGCAAAATCACATCTCACACGTATCCATACA	T // C	0.71
Affx-961024485	1	92274763	Subspecies	GAACCTATTCTAAACAGCAACACTGGAATCCAAAA[C/T]ATAATGAAGAAAGGACTTTAAAATTTTGACTGAAT	T // C	0.632
Affx-961110357	1	92823947	Parentage	AAGATAAGCAAGGTAATATTTAGACAAACAAAACA[C/T]TGAAAACTAATTTAGTGGCATGTTGATTTTAATTA	T // C	0.742
Affx-961024501	1	92888524	Subspecies	AAAATTTTGATAATTTAATTTGTATTATCCCAAAA[A/G]GGGCTACATGAATAATTCTTTTTTTTCAAATCTCA	A // G	0.632
Affx-961024503	1	92899102	Subspecies	CATAACAGCTTAATATTTCCGACTTTGAAATAAAC[A/G]GGGAAAAGGATGAAAGTGTCATGTTTATACTCAGA	A // G	0.71
Affx-961024504	1	92902669	Subspecies	TTTAAAGCAATTATTAGTTATCCTAACAACATTAT[G/T]ACTGTCATTAATAATTATTATTAACCTTAACTATG	T // G	0.708
Affx-961024506	1	92931249	Subspecies	GTAAAACTTCAACAGGCTTTCTGGGGACATTTGCT[A/T]CCAGAATCTTGCTGCCATGCTGCGAGGAAGCCCAC	A // T	0.606
Affx-961024507	1	92937988	Subspecies	TCTTGAGAACAGTATCTCCCAGGGAATTTTTAAAA[C/T]TTTAAATTTCAACACCACCATTCCTTACCATAATC	T // C	0.624
Affx-961024508	1	92946274	Subspecies	CATTTATAACTCTAAATTGAGTTTCCCAAAGTGCA[C/G]GTTGAGAACTACCAAAAATAAATCTATCTGGATTA	C // G	0.7
Affx-961024509	1	92951723	Subspecies	AGGAGGATAATAAAGACATAATAAGTAAAAAGATG[A/C]AGAACATGTCAGAGCACTTTTACTAGCTGTGTCAT	A // C	0.782
Affx-961024510	1	92953382	Subspecies	AAAATCTACTGTAAGGAATACCTGTCCCTTCTCCA[C/G]TGTCATAGAATTCATATTTGTATGGCCCTAAAATT	C // G	0.724
Affx-961024511	1	92954639	Subspecies	ATAAAACAGCTGAGCAGTACCCTTAAAAAGTGTCA[A/C]GTTCATGAAGGAAACAGAAAAACTGAGAAATTTAC	A // C	0.706
Affx-961024512	1	93127163	Parentage	GTACCAAGGCACAAACTTTCACCTATAATGTAAAA[A/C]AGTTCTGAAAATCTAATGTAAAACATGGTGACTAT	A // C	0.636
Affx-961024515	1	93171613	Subspecies	ATTTGAAGCCAAATGCTTACACTCAAAAGGCAAGA[A/C]TTTATTAACCAAAAGACACCCAAAGTGGTACTAAA	A // C	0.784
Affx-961110373	1	93236235	Parentage	ATAGCACCACTTATATGGTAGTAAAACTCAGAAAC[A/G]TAAAGTAGAATGGTGGTTTCCAAGCACTAGGGAGA	A // G	0.778
Affx-961024520	1	93391239	Subspecies	CCATTGTACCATGGGACATATAGAATGACACTATA[C/T]GTGGCATTTCTTTGAAAGGGATATTAAAAACAAGA	T // C	0.65
Affx-961024525	1	93618170	Subspecies	ATTAGATTGTACAAGGCTAGAAATATCTCTCTCTA[A/G]ATTTTATTTTTGTGACACAAAATAAAATTTTGTGA	A // G	0.71
Affx-961024537	1	94225014	Parentage	ACAATGCCTTCATCACGAGAGTTCTTCATACAGCA[A/G]TCTACAAGGGTGATCTCTCCCTCTTCCCAACCTCA	A // G	0.756
Affx-961024556	1	94975294	Subspecies	ACATGAAGATTCCTAAGATCACTCCTGACCCAGTA[A/T]ATCAAAATTTGTTGGACCTGGCACCTAAGAGGCCT	A // T	0.708
Affx-961110564	1	94980266	Parentage	GCAAGAAAGTTTGCTTGCTTTTCCTTAAAGTGTAA[A/G]CTAGATCTGTGTGCATATTAATGGATTAAGCAAGA	A // G	0.732
Affx-961024557	1	94986179	Subspecies	TAGAGGTCACTTTTAGACATTAGGATACTTATTCT[C/T]GGTTTTTGTGGGGACCTGAATTATGTGTTTCTTGG	T // C	0.652
Affx-961024558	1	94990547	Subspecies	GTCTCAAAGAAAAACAAAGCAATGATTTAGAGAAA[A/G]TGGCCTTTAAACGGAAGGCAGAAGGTGACGAAAAG	A // G	0.622
Affx-961024560	1	94996901	Subspecies	ACAAGTGCCCCAGCTAGTTTGTGGCAGGGCTGAGA[C/T]CAAATTCCTGTGTCCTAATTTCATATCTGAATATC	T // C	0.696
Affx-961024571	1	95689663	Subspecies	TTTGGGAGTGAACACAATTCAACCCATAAAAAACA[G/T]CATCCCTAATGATTCACTTCCCATCTACCAAAGAA	T // G	0.688
Affx-961024585	1	96201177	Subspecies	CCCATTATTGTAAGACAATCTTCAGTTACTACTTG[A/C]GAAAAGTGAATTTATAATATTTTAATATTATATTT	A // C	0.668
Affx-961024586	1	96210466	Subspecies	TCAAGAACTTGATTAACCATGATAGTAAAATACCC[A/C]AAATCAAACTGGTAGGTAGGGGGCAGAACCAGGCC	A // C	0.728
Affx-961024587	1	96213456	Subspecies	CACTTTCACATCCAGTCCTGGTTCTCTACATCCTA[A/G]CTTTGCTACATTTGAGAATTACAAATAAAAACTGA	A // G	0.736
Affx-961024598	1	96537677	Subspecies	AAATTTCTTATTTTGTAGTTTCCACAGTTTCATGC[A/G]GTTCCTTTTCAGAACTGCTGGGTATGCTTCTTCTA	A // G	0.644
Affx-961024599	1	96574883	Subspecies	ATGAGATTAAGTTCAAGCTTAATGTAGTAGGTATG[G/T]TCCTTTAAAAAGTATTTCTGAAAGTTTGACTAGGA	T // G	0.69
Affx-961110656	1	96709264	Parentage	GTATGGTATAATTATATGATGAAATACCATTCAGC[C/T]GTTAATAATAATTAGAAAGTTTTTAACAATGTGGA	T // C	0.732
Affx-961110831	1	97997270	Parentage	ATTTTCATTAGTTAGTAAGTGAAAATAAGAACATA[C/T]AGTATTAGTTCATTTAGCTTGCTTAATCAGAGAAG	T // C	0.738
Affx-961024658	1	98637020	Subspecies	CCTACTCGAAGGCAGAGACAGGCAGTGAGGCATAC[A/G]GGATGAAAAGCCCACACCAAACAGACTGGCACTGA	A // G	0.6
Affx-961024659	1	98637673	Subspecies	AACTAGATTCTTACATATAACATTTTAACATTATA[A/C]ATAAAAGCATGATAGCAATGACATGCAGAAATTAG	A // C	0.776
Affx-961024660	1	98637852	Subspecies	CAGTAATCTGTCCTCAGCCTAGAGCTTCCTTGACA[C/T]GCCACTTTACTTTGAGCCCATTTGCACTATGGTGA	T // C	0.712
Affx-961024661	1	98640422	Subspecies	TCGTATAGCAAATAGTAACTATTTGGCTGCATTTT[C/G]CAGAAATCTGGATGAGGCATGGCATAATGGCTCAT	C // G	0.638
Affx-961024662	1	98642078	Subspecies	GTACGGCAGCCCGTGTCCACACTAGAGGTGACAGG[A/G]GAACACACGGGAGCCATCTGTAGAGTTGGAGACAA	A // G	0.666
Affx-961024663	1	98642237	Subspecies	AGTAGGGTGTCCAACTAGGTTAGGGCGCAGCTATA[A/C]GGCAACAATGCTGTCTTCTTCCAGTATTTCAGGAG	A // C	0.638
Affx-961024664	1	98642374	Subspecies	TGTGGTTTAATTTTTACAGAATGGTTCTCAATCAG[C/T]TTCACCTTCTGGGTTTATGATCACTAAGTTCTAAA	T // C	0.802
Affx-961024665	1	98645113	Subspecies	TGAAGACATACATCTTTCTGAGACACCTGAGGAAA[A/G]TACTATGATCTGATGTTTTTGAGAGCTCACTCTGG	A // G	0.664
Affx-961024666	1	98646457	Subspecies	CTATACTTCAATAAAAAAAAAATAACAGCGAGCTA[C/T]ACTATACTTCTTTCCTGAGCCGTATAGGTTTCTGT	T // C	0.72
Affx-961024667	1	98647753	Subspecies	ACTACAGAACTGATGGAATGACAATATTTAAGGAC[A/C]ATTTAAGGACAATAGGTCATGTCCTTAAATATTAT	A // C	0.706
Affx-961024668	1	98648218	Subspecies	CAGGTCTGGGAATCATCAGAAGACATGTATATGGA[A/G]GGTCAAAGGGAGGCACAATGTTTGCTTTTGACTGT	A // G	0.65
Affx-961024670	1	98649884	Subspecies	TTCTTTACCACTGAGCCACCTGGGAAGCCCACATA[C/T]GGGATGGCACGAGTATATAGTTTTTACCTAAAATA	T // C	0.67
Affx-961024671	1	98660015	Subspecies	AATAATCTCTGGACTTTCTGGCTACATCTCTGGGA[C/T]GGTTCAGACTTTCTGACAACAATATTCTTTACAGA	T // C	0.752
Affx-961024678	1	98780555	Subspecies	AAGGAGCAGGAAAGGGCTGTCTGGCTCACTGGGAC[A/C]GGGCTGCTATTTAGTCTGGCTGTTTCCTACGCTCT	A // C	0.656
Affx-961110981	1	99221332	Parentage	TTTTTATCCATGTTAAAGATGGCTATCTATTTTAC[A/G]TCATCTTCTTTTGTCAACTTTTCAGTATTACCAAA	A // G	0.744
Affx-961024690	1	99270953	Subspecies	AAACTCTTAATGGCATTGTTTCCTAGATTCTCCTT[C/G]TGCAGCAAAGTGGAGATTGTAGCTGTTTTAAAGGA	C // G	0.674
Affx-961024698	1	99686049	Parentage	TGACTGATCTGATCTGATGATCAATATTTATATAG[G/T]TATTTACATAACAGAATATTGATTGAAGAAAACAC	T // G	0.666
Affx-961024713	1	100069219	Subspecies	ACAAACATACTTCAAGGATTAAATCATATGAGTCC[C/T]TAAAGAACAAATACTAGACTGGTTACATTTTCGGA	T // C	0.704
Affx-961024714	1	100070854	Subspecies	GTATGCATAAGGTGCTTTCATTTAATCATTTTAAA[A/G]TATCGATACTTAATTAGCATCTTCTAATTATATAC	A // G	0.604
Affx-961024719	1	100195352	Subspecies	ATTTAGGCCTTTGAGAATGTAACTTTTACATTTTT[A/C]ATGGGACGGAAGGATAATTTTTCTTTTAGCTTACA	A // C	0.656
Affx-961024720	1	100197365	Subspecies	AAGGAGAGCCTTACGGGCACTGGAGTGGGGATCCT[A/G]TGTGATCCTCAAAACGGTGATAATTGTCCCCCTTC	A // G	0.682
Affx-961024722	1	100215132	Subspecies	TTAAACCACTGAGCCAGATTGTATTGGGTTGTCCA[A/G]CTGAATCTGTGCCACATCCCAAAATGGTGCTAAGT	A // G	0.668
Affx-961024738	1	100732319	Parentage	TTTAGAGAGCAGTAAGAATATTGCTTAGGTCTTCT[C/T]GAGTGGCACAGGTGGTAATGAATTCACCTGCCAAT	T // C	0.628
Affx-961024740	1	100757513	Subspecies	AGTTTGAGAGATAGTCAACTAGGACAGAGGAAAAG[A/G]AAGGAGGGAAATTAACATTTATTGAATACTATTAT	A // G	0.728
Affx-961024742	1	100792237	Subspecies	TTAAGATTGTTAATAGGACAACTCCCAGATTCTAT[C/T]ACTAAGGAAAAATTGCATCCTTCATAATATTTATT	T // C	0.722
Affx-961111295	1	101325751	Parentage	TCATTTGTTTGGCTTTGTCATTATATGTAATGCCA[G/T]TTAAACCCAGTTCTTCATTTTTTGAAAGACAGCTT	T // G	0.736
Affx-961024758	1	101426991	Subspecies	AAGTTGGACGTGACTCAGCAACTGAACAACGCAGC[C/T]CTAATTAGCTAATTGAGTCTGCCAAGTAGAGTTAA	T // C	0.656
Affx-961024759	1	101433854	Subspecies	GATATATAGAGGAAATAAGTCATATACAAATGATG[C/G]TATTTATTTATTAATATCTTTTTTATAAAAATTAT	C // G	0.732
Affx-961024761	1	101448130	Subspecies	GGAGAGGGAAGCAGGGAAAGGCAATATAGGGGTAG[C/T]AGAGTAAGAGGTATAAAAATAAGCTACAGGAACAT	T // C	0.754
Affx-961111299	1	101448252	Parentage	GTATAACCTTTACTATGAGTCAGTACATTATACAC[A/G]TGTTGTTTTGATGTTGTTCAGTCACTCAGTCATGT	A // G	0.728
Affx-961024762	1	101451643	Subspecies	CAGTCTTCACATACACATTAAGGTGGGATGGAAGG[A/T]TACAGACATTCAATTCACAATGCACAGTAAAGTAT	A // T	0.776
Affx-961024765	1	101532808	Subspecies	TGATGACTGTTTCTCAGATATTCTTTGCTTTTAGA[C/T]CTTTACAGTTTTGAGGAGTACTTACTGATCAAGGA	T // C	0.64
Affx-961111326	1	101999009	Parentage	CAGCTAGGGTGTAATCCTTCAAGGGAAGTAAACTG[C/T]ATGACTAACATAAACCTAGGTAAAGAATAAAAGAG	T // C	0.738
Affx-961024775	1	102087279	Subspecies	TTCTAGGCAGTGACTCATTAACTAATAGCCTTACA[A/G]TGTTCCATATGTCATTTCCCATCTGGGACAGCTGT	A // G	0.69
Affx-961024776	1	102087394	Subspecies	TCTCTATGACCTGAATTAAAACAAACATGAAGGGG[A/G]AAAAAATGAAAGAGTTCCACAAACATTTGAAGACT	A // G	0.614
Affx-961024780	1	102097435	Subspecies	ACTATATCTCAAAATGAAATCAAATTAGCTTTAAA[A/T]TGTAAATACAAAATGCTGAAACTGCAAAATTCCTA	A // T	0.758
Affx-961024781	1	102099221	Subspecies	TCATCACAAACCTTGCAAAACAATACAGCTGCTTC[C/T]TAAGACAAGGGCATCTGGAAACTAGAGCATCACAT	T // C	0.694
Affx-961024783	1	102101586	Subspecies	CAGAGTATAGGTTTCTATGCCTTATATTTGATAAA[A/T]GAAGAAATTCCTGACTAAGGGCAACTGGAGCAAAA	A // T	0.662
Affx-961024784	1	102105268	Subspecies	GTGGGAAATGTCTTCTTATTTTCCTTTTCCCTTGA[C/T]GGCTTTTACTATGATTAGCCCTGAGATTTTAGTCT	T // C	0.708
Affx-961024785	1	102105326	Subspecies	GAGATTTTAGTCTTTTATACTCTGCCTTGATTCTT[A/G]CATGAAATCTCTCTATTTAATTTTATTTTTAACCC	A // G	0.602
Affx-961024786	1	102105798	Subspecies	CTTAAAAAGTCTTGGACACTCCTAAACAAATCCAC[A/G]CTATATTTCAGAACCAGTGGCCTAGACAACTTTGT	A // G	0.704
Affx-961024787	1	102106095	Subspecies	CATATAATCTGAAAATATTTTCTCCTATTCAGTAG[C/G]CTGTCTTTTCATCTGGTCAATAGTTTCCTTTGCTG	C // G	0.744
Affx-961024788	1	102106954	Subspecies	GGACCTAGAATATTACATGTAGTGAATTAAATCAG[A/G]CAAAGTAAGATAAATACTCTGTTATAACTTATATG	A // G	0.692
Affx-961024790	1	102108735	Subspecies	TGCACTTAATATACTCACAAATTGTCAAAAGAAGC[A/G]GACCAGTTTTTCCCCTGATATTAGATAGGTTTCTG	A // G	0.73
Affx-961024793	1	102110503	Subspecies	TAATATTTATTACTGTTTATATGATCTGTTTGTCT[C/T]CTGGCTCTTCCACCCTCCATACATACTTTATCTTA	T // C	0.696
Affx-961024794	1	102110684	Subspecies	GCTTTATATCTTCAGATGTAAAGACTGTGACTCAT[C/T]ATTTATCATTTTTTTTTGCGACTCCATTTCTTTTG	T // C	0.718
Affx-961024796	1	102174650	Subspecies	TGTTTATAGGACCATGTGCTCTATTTGTCAGATGA[C/T]TCATTGTTTACTGTGTTATTCTTTATGTCTAGCAT	T // C	0.752
Affx-961024797	1	102175518	Subspecies	TCACAGATGGTCTGAGAATGAAAATATAAGCTGTA[A/G]GGCTATATTACATTTTGCAATACTACAAATGAATC	A // G	0.74
Affx-961024798	1	102176111	Subspecies	AGAACCGAGGAAATTACACACTCCCCTGACATCTA[C/T]GGTGCAGTGATTCAGATTTAACCTAGCTGAAACAA	T // C	0.658
Affx-961024801	1	102201451	Subspecies	TTTTGTATGATTTTCCAAAGTGAAACCATCTAAAC[C/T]GGTGTTTCTTTTCATTATTTCTGAAAGCTGCAATG	T // C	0.618
Affx-961024802	1	102204007	Subspecies	GAAGCTAAAAAAATGTAGTTCCCTGCTAGCCCAGA[A/G]AGGAAAGAATAAGTATATAGTATGAACACAAGAAC	A // G	0.652
Affx-961024803	1	102204924	Subspecies	ATCCTAGTGTTTTTTGCTAAGCAAGTTCTAATTTC[G/T]ACTTACTCTGTCAAACTAGTATAATATATATCAAT	T // G	0.706
Affx-961024804	1	102205318	Subspecies	TTAGCATGTATTCTGTCTTAGAAAAGAAAACTGGC[C/T]TTCAATTTGAAAAGATAAGACAAACATTTGTGATG	T // C	0.676
Affx-961024805	1	102208254	Subspecies	CAAGGAAAGTAGCTCTCACATTCAAAAGGACCAGA[C/G]GAAGTGCCTTAGGTCAAGTCAGTTTCAAGGTCTCC	C // G	0.624
Affx-961111430	1	102653411	Parentage	CTGGATAATAACCTGTAAAATTTTTTATACTATGG[A/C]TATTTCAGTTCATTATTACTGACAAGTTTACATTA	A // C	0.73
Affx-961024828	1	103305348	Subspecies	CAGAGTAATCTGGAGCCTGAGACGTGTAGACCAAG[A/G]AAGCACACATGCCGTGAGCAGAACCCAGTGTGACT	A // G	0.624
Affx-961024830	1	103348965	Subspecies	AATAAACTTATTCCCTCTGCTTGTTTTCATTTGTG[C/T]TGTGATTGTCTCATCAAAATAGTTTGTGTAAGTCT	T // C	0.692
Affx-961024832	1	103357891	Subspecies	AACATCAGTGCCATCTGCCTCGGCATCCTCAAGCT[C/G]TATGGCTGCCCCATTTCTCACCTTGCTTGTGGGGT	C // G	0.602
Affx-961024833	1	103359948	Subspecies	ATTCTTTGAACTAAAAAGTTCTACAATAGTATCTA[A/G]TACTAGAGATGTTTTAAATAGGATAAAAGTGAAAA	A // G	0.708
Affx-961024836	1	103380517	Subspecies	AACACCAATGATTCTCCATTATCTGCACAATACAA[A/G]CAGGGTTAATTGATTTCTGCTTTTTCTTTGCCTTT	A // G	0.702
Affx-961024854	1	104067782	Subspecies	TATTTTTCTTTTTCTTCTAGCAGAAGAGTTACCTT[G/T]TCAAAATTCAGTTCTCTGCATGCTTTTTAAGACAT	T // G	0.704
Affx-961024860	1	104304764	Subspecies	TTAAAATAAATTGTTGGTAGAGACAGAAAATAATA[C/T]GTCAGAAACTCAGATCTTTATAAAGAAAGGCACAC	T // C	0.696
Affx-961024863	1	104343186	Subspecies	CAATGACATCACCCTTAAGACTTGAACCAAATGAT[C/T]AGACAAAGCAATATATGAATTATAATTACTAAGAA	T // C	0.686
Affx-961024865	1	104413456	Parentage	AATCAAATTATATTTCAATATAGGCTTCAGAAATC[A/G]GTGTATCATTAATATCATATTATTAAAAATGTATA	A // G	0.704
Affx-961111630	1	104989338	Parentage	AGAGACCAAACTATCAATACAACTTAGAGAAAATA[C/T]ACATGATTCCAGTTAAATAAAATTTGAAATTGTGT	T // C	0.734
Affx-961111632	1	104999731	Parentage	TACAGGTTATCATGGTTAACATCAAAAGAAGTTGA[A/C]AGCATATTGGCAGCCAGTAACACTGATAAAATATA	A // C	0.728
Affx-961024875	1	105049197	Subspecies	TTCTCTAGAGATTTTTAAAAGTTATCAATGTATGT[C/G]CCTATATGAAGCCTAGTTGAATATCTCTCTTGGTG	C // G	0.702
Affx-961024876	1	105049878	Subspecies	ATCTTGCTAAGATAGGTCACCTAATCAAATGAAAT[G/T]GTCCTCTGACTCATTTCTCTGTTTTCACTGGATCC	T // G	0.758
Affx-961024877	1	105049964	Subspecies	CACATAGCATGTAAAATAATCCTTTTGTTTTACTT[C/T]CAGGAACTCAATGAGGTTCTCATAGTAAATATCTG	T // C	0.672
Affx-961024878	1	105054320	Subspecies	GCCCAGCAAATTGACAACTCAAGTCTATCCTTAAT[C/T]ATCACCTTTGTTTCTCTATGTCTCTGGAGATTCAT	T // C	0.656
Affx-961024879	1	105054543	Subspecies	AGAGTTTAAGCGAGAATTCCGGCTGATAAATGGCT[A/C]TTCTTCTAGAAGAAGAAAATTGTTATATTCCAGGA	A // C	0.724
Affx-961024880	1	105058720	Subspecies	TAAATTAGGAATGCTAAGGATATAATCTCCCTAAG[A/G]TTGTTGTGATATTCAATTGTGAACATTAATGTAAA	A // G	0.754
Affx-961024882	1	105059186	Subspecies	ATACTGCACACTCGGACTACTAAATACTGATAATG[A/G]TACTTAAAGAAACATTTATGTGATACTTATAATGT	A // G	0.738
Affx-961024883	1	105060716	Subspecies	AAGGATCTGTCCCTGGGAAGCCCCTACATGGTCCC[G/T]CTTGGTTTCAATATACTATGAAACATGTCCTGATT	T // G	0.732
Affx-961024884	1	105061958	Subspecies	AATAAACCTTTGAAACTGTAGAAGCAGAAAGATTA[C/T]AAGGGTGATGATTAGCAATCTCAAAATATGAAATT	T // C	0.71
Affx-961024885	1	105062018	Subspecies	AATATGAAATTGCTACAAAGTGTCTTATTTGCAGC[A/T]TTTTTTGTCATTGAATTTGCAACTTAGCGCTATGA	A // T	0.64
Affx-961024886	1	105063860	Subspecies	TCAGTTTGTGAGATGGAAGAGCTAAAGAAGAGAAC[A/G]ATCCCCAATGTATATTTATATATATGCTTGTGTTT	A // G	0.692
Affx-961024887	1	105064440	Subspecies	AAGTCCAGGGTGAGGCCATGGTGTCTCTGGTGGAT[A/G]GTCACACTTAAGTTTGAGAAATGTAGGTAGTCATT	A // G	0.646
Affx-961024888	1	105068245	Subspecies	TGGGCCAGAAAGACCCTTGTTGGAACCTGACAGGA[A/T]CAGGTAGGTAACAGTTTCTCTAAAACTAGATGCAT	A // T	0.662
Affx-961024889	1	105071031	Subspecies	AAAATGCTAGACAACCTGAACTGTTAAATTCTGGA[A/G]GTTGGAAATACTGTTGGTCACTGCCAGATTTGTCT	A // G	0.726
Affx-961024890	1	105071302	Subspecies	CCATTTTGTCACACAGAATATTGAAAAAATATGTA[C/G]TATGGGGTCAAAATTGAATTAAAGCAATAATTTGT	C // G	0.664
Affx-961024891	1	105072344	Subspecies	CAGTTGAAAATGAGTTTAGACAGGAAATACACACT[A/T]TTCATGGAAGAGGTAATAATGTACCCATAATTAAC	A // T	0.692
Affx-961024893	1	105073395	Subspecies	GATATCTACAATTCCAATCCATTTCCACAGAGTTC[C/T]CCCTTTCTTCCTTCATTTTATGTTTTTATTTCCCC	T // C	0.656
Affx-961024894	1	105073634	Subspecies	AAAGCTCGAATGCTCACTGAGCTCAGCATCAAATC[C/T]AGATACAGGCAATATGGAACCATGTTTGCATTTAT	T // C	0.666
Affx-961024895	1	105073702	Subspecies	TATAGCCTATCTATAGGAAACTCTTTTATAAAAGG[A/G]TTTAAATATCTCTTCAGGGGAGTACCATAAATGTG	A // G	0.656
Affx-961024896	1	105074562	Subspecies	TCTCTTCAAATTAAGCCCAGTTTCAAACAGTATTG[A/T]AGTCATGAAGTGGCTGAATTCTGACTATAGGATAA	A // T	0.624
Affx-961024897	1	105075897	Subspecies	TTCCAAACAGGTTGGCTCATTTAGAAGTAAATATT[A/G]TAAATCATAGAATATCAGCACAGGAAAGCTTTTTA	A // G	0.702
Affx-961024898	1	105076146	Subspecies	AGTCTAAACCTGTCATTTTTTGATTAGGAAAAGAA[A/G]TCTAAGTGTGATGATATGAAATAAATGTCAAGAAG	A // G	0.726
Affx-961024899	1	105076972	Subspecies	ACTAAAAAATAAACAATATGCAAGCACCAATTCAG[A/G]CATTATTAAAATATTTTTATGAATCATTCAAAGAA	A // G	0.616
Affx-961024901	1	105083257	Subspecies	CTGAAAGTTAAATAATTTGCTGATTATAAAAATGT[A/C]TTTTAACTTATGGAAATATGCCAAATATTCAATCA	A // C	0.706
Affx-961024902	1	105083937	Subspecies	GCTGTAAGTGGTGAAATAAGTTTATCATACCTTTC[C/G]AAAATAACTGCCTTGAAGAATATGGTACTCATTTT	C // G	0.718
Affx-961024903	1	105092235	Subspecies	TATTCCTCTCTTATCCTTTTGATGTCCATAGGCTC[A/G]GTAATGATAAACTCTGTCACTTCTGCTATTAATAC	A // G	0.686
Affx-961024904	1	105092888	Subspecies	TATTCAGGTCAATCATTTTCTTATTGATTTTCTTC[C/T]TGCTTGATCCATCAATTACTGAAAGAAAAGAGTTA	T // C	0.69
Affx-961024905	1	105093282	Subspecies	CACATGGAATTAAAGGATATTAAACTAGAAATAGC[C/T]AGTACAGAGAAGTATTTGGAGACATTTTACTGCAA	T // C	0.692
Affx-961024906	1	105093758	Subspecies	AATCAACTAAAATTTTGGTGATATCTCCCTATATG[C/T]AACTGTATTAGTTAGATGGGTTACCATACAAAATA	T // C	0.684
Affx-961024907	1	105096320	Subspecies	GCTCTATTTATAATCACCACAACTTTGAAATAACC[A/G]AAATATTGTTCATTGAATAAACAGATGAACAAATT	A // G	0.752
Affx-961024908	1	105097667	Subspecies	CAGATAAATATATATAGGAATGCTATATATGGTAT[A/G]GGTGACATTTCATTTCAGTGAAGAAATACATGATA	A // G	0.674
Affx-961024909	1	105103771	Subspecies	AGTCCTGAATTCGACAAAGGAATTTTCAAAAGAGG[C/T]TTGGAACAAGTTCTACATCCTACAATTCCCTTAAT	T // C	0.718
Affx-961111662	1	105132899	Parentage	CAACTAACCATAGATGACCTTGAGATATTAAACAT[C/T]TCATGCTGAATTAAGAAATACTTTAATCTGTTCCT	T // C	0.752
Affx-961024912	1	105151898	Subspecies	TACATATATAATGTAACTGAACTATTAATATGTGA[A/G]TGACAGATAATAGAAGCCAAGTTTGCTACTATTGG	A // G	0.666
Affx-961024914	1	105189816	Subspecies	ATTCCACAAATTCTCATATCTGGCTATATCTCCTT[C/T]CCCATTAAGTCACTGGTTTTAAGAGTGGGACCACT	T // C	0.734
Affx-961111683	1	105257053	Parentage	TAGCCTATTGAGTGCTGCTGGCACTTTAACAGAAT[C/T]ATCTTTCAGAATTTGAAATAGTTCAGCTGGAATTC	T // C	0.744
Affx-961024928	1	105665794	Subspecies	GCATGAATATGTTTGTATTTATTTATACTTTGTAT[C/T]TAATATATGGCTGTGGAGAAATATAGAAGCTATCA	T // C	0.748
Affx-961024929	1	105667538	Subspecies	TTTCCCAAAATGTTTTGTGCTCTAGGATAATTTAA[C/T]ATGAAAATGAACTGAATATAAGGAAAACCTGGACC	T // C	0.742
Affx-961024931	1	105671572	Subspecies	AACAATAGTGTCAAATAGAATGGAAAAATTCTGGA[C/G]AGCTATGACTTTTCCCACTGTATACATGACTTACT	C // G	0.634
Affx-961024932	1	105672269	Subspecies	CTTAAAATATTTGAGAGCTCTGATTTACCCCTGTC[C/G]TTAACTCCAAATCAAATAGCCTAAAAATGTGCTGC	C // G	0.75
Affx-961024933	1	105676497	Subspecies	GGGATGCCCCTCTTCCCCTTCCCACCTCAAGGCAA[G/T]TGAAGAAGGCACCAAAAGAACACTTTCAGAGGTTG	T // G	0.624
Affx-961111749	1	105797520	Parentage	ACGGAAAAAGTTAATGTTGTGACTGACAGTATTTA[C/T]CTTTTACCAGTTATGCAGAATGAATAGGGAACCAC	T // C	0.728
Affx-961111786	1	106141717	Parentage	CAGACCTAGCAAATGACAAATACTTCACTGCTAAT[A/G]TCATACCCTGCACTCTTTCTATACAATACTTTCAC	A // G	0.752
Affx-961111802	1	106243496	Parentage	GCTAATATTTTTTAAGACATGCTGAAAACGGCTGG[C/T]ATGTACTTTCCCTTGTAGTTTAAGGATTTCAGACC	T // C	0.768
Affx-961111806	1	106267073	Parentage	ATAAAGAACAGAGGAAAAGGATATTAAAGTAACTA[C/T]ACCTTTGGTTTCATACCAATATTGAAAATATCTGA	T // C	0.754
Affx-961024947	1	106322087	Subspecies	ATCAGCTGTGACTGAATCAACAGACCAGTTCACTA[C/T]AAATTGGGCACTAAGGAGTTCTACACTCTTTTCTA	T // C	0.722
Affx-961024955	1	106520841	Parentage	TTCCAATTTTATTTTGAAAAGCAAATAATTCTATC[A/G]TGCATATTCCATAGTCATATCATAATATGGCACAT	A // G	0.768
Affx-961024964	1	106811098	Subspecies	TTTGATGAGCCTTCTACACTCCATTTCTAGATGTT[A/G]TTAGTGCCTGGCATTCCAAGTTCTCTGCAACCCAG	A // G	0.684
Affx-961024965	1	106825319	Subspecies	CATGGGGTCACAAAGAGTCAGACACAACTGAGTGC[A/G]TATGCACACATAAGGTGATAGTAATAAAAATAATA	A // G	0.72
Affx-961024968	1	106832557	Subspecies	CTTTCCAGTCCATTTTAGTTCACTGATTCCTAAAA[C/T]GAATGCTTAAACCTAGCAAAAGGTAGACATTATTC	T // C	0.638
Affx-961024969	1	106843260	Subspecies	TGTCTTCAGACCTGAACTAAAAAATCAGCTCTTAG[C/G]GTGTATGCCCAGTAGTGGGATGCTGAATCTAGAAA	C // G	0.676
Affx-961024971	1	106870221	Subspecies	GCGGCTACTGAGCACTAAAATTTTAAATTGCCACA[C/T]GTGGCTAGTGTTTGCCAAACTGGACAATGCAGAGA	T // C	0.664
Affx-961024980	1	107240251	Subspecies	AGTTCTATGCAGCTGCTTCTCAGAACAACACTTGA[A/G]AGACACTCAAAAGCTACTTGGAGAGAAAGAAATGC	A // G	0.664
Affx-961024981	1	107243423	Subspecies	CGGGTGGGGGCAGGGAGGAGGAGAGAGGATAAAAT[A/G]GGCTGACATGTCAGAAGAGAGCTCTAAGGTGGCAT	A // G	0.6
Affx-961024982	1	107243753	Subspecies	TCAACAGTACAGCTTCCCACTGTGAGAACTCAAAC[A/G]TTGATTAGGTTCTGGGCAGAAGCTGGTATGCAGAG	A // G	0.67
Affx-961024983	1	107246027	Subspecies	AGAAGCGAAGTAAGAGTGAAGAGCTGTTTGCCTGG[A/G]GCCCAAAGACACAAAAGGACACGTTCCCTCTCCTC	A // G	0.6
Affx-961024984	1	107246951	Subspecies	TTTTCTTCTCACTTGGTGCACTTTGAGAAATCATA[G/T]CCCAGAAAGGACTTTGAGGTCCCCATATGAGGGAA	T // G	0.732
Affx-961024985	1	107247742	Subspecies	CTGTTCTTGCTCTGGGAGACACCAAATGTCCTTAC[A/G]TTTTAAGGCTTTTTATGTTGGATTTTGTTGTTATT	A // G	0.736
Affx-961024986	1	107256892	Subspecies	AAAAATCTTCTTGAGCATCCATCAGCCTTGGTTCT[C/T]GGATAAACCACAGGCATATGAAGATGGAGCAAGTT	T // C	0.604
Affx-961024994	1	107531484	Parentage	TCAGAATGAATAAATGAATGAAATGGAACCAGACA[A/C]AGAAAATCATGCAATAAGACTATAACATAAGGTAT	A // C	0.736
Affx-961112020	1	107633677	Parentage	TGTGTTAGTCACTTGCTTTGGAACTTTGATTTTTG[C/T]TAAAACAAAAATCATCCTGAAATTATTGAGAATGT	T // C	0.812
Affx-961025002	1	107728177	Subspecies	TCTGAGAGAGAGTTGAGGCACACACACTCTTGATA[C/T]TGGGGCACTGGAGGAGATCAAAGGGAGCACAGCCA	T // C	0.652
Affx-961025003	1	107731577	Subspecies	GAAACTAGTCCTCACAAGTATAAAATCACAGAGCT[C/G]GCTATGATATTTGTAATGACCTCTATTCTCTTTCT	C // G	0.704
Affx-961025004	1	107734191	Subspecies	TAATTGTCACAAATCAGAGGAGGCTAAGGAAACAT[A/G]ATGACTAAATGTACAGTGTTGTCCTGGATGGGATC	A // G	0.688
Affx-961025005	1	107741242	Subspecies	CACGTGTATGATGGAGAAGTAGATGGTGCCTCCCT[A/G]CTAATAGAGAACAAAGCAGGGGCAACAACCCAGAA	A // G	0.612
Affx-961025011	1	107817636	Subspecies	ATTACATTTAGTAGCCATGCCCTTACGTTTCTGTT[A/C]CTCTTCCTTTATTCTTTCCCTTATTAAATTTATTT	A // C	0.674
Affx-961025017	1	108050655	Subspecies	TGTGTTCATTACAGACTTATAAAATGGTCAGGATA[G/T]TTGAACCCTTACTTTGGGCAATTCACTTGAATTTT	T // G	0.686
Affx-961025025	1	108289459	Subspecies	ATAGAAAATGAATACACTGCTCCTGGAGGCCTGAG[C/T]AGGTTGTAAAAAGTTAGATTTGCAACTACACTGCA	T // C	0.682
Affx-961025027	1	108322356	Subspecies	TGTCCAACATTAGTGAAAGTAAGTACATTATCATA[C/G]AATATTATATGACCATCAAAATTAATCTACAAAGT	C // G	0.758
Affx-961025028	1	108325675	Subspecies	GGATCAAACCCATGTCTCTTGAGTCTCCTGAATTG[A/G]CACACCAATTCATTGCCACTAATGCCACATATACA	A // G	0.664
Affx-961025058	1	109422784	Subspecies	TAAATCTTAGCCCTGTTAAAAACTCTGCAACAGGT[C/T]CGCATTGCAGTTAAGATAAAACCACTATGAGATAT	T // C	0.772
Affx-961112186	1	109426326	Parentage	AAGAAGAGAGGGAGAAGGAGAGAAAGTGAGGATGG[A/G]TAAGACAAGTCTCATAGTTACAAATATTTATGAAA	A // G	0.728
Affx-961025060	1	109442686	Subspecies	CACTTTCATATGTATATAAAATGTGACTACACAGA[A/C]TCTGAAATAAGAACAAAGGAATGTAACCTTAATTA	A // C	0.734
Affx-961112189	1	109449103	Parentage	GAAATTAAGCTGTCTCTTCTACACGTCAGCTCAAA[C/T]GCCAGCACTGGCTTTTCCTCTCATTCAGAGTAAGA	T // C	0.732
Affx-961025061	1	109450188	Subspecies	AATAAGTAAATAATTTTTTCAAAAAACATTCCACA[A/T]GCAGTAATTCCTATCCTCCTTTCAGGCTTTATTGT	A // T	0.662
Affx-961025062	1	109451073	Subspecies	AGTCATTGGTCTAGAGGGGAATTGGGGGAGGATGA[A/G]TATTAGACAGCTGTACTTCAGGAAAACTCCCCAGT	A // G	0.644
Affx-961025065	1	109455264	Subspecies	CAGCTCCTGAGGTGTTTCCCTAGAGCCACCAAAAT[C/G]TGAGCACCACGGCTCTAAAGCACAAGGGTCAACCT	C // G	0.71
Affx-961025066	1	109457574	Subspecies	ACTATTTGGGGGGCAGAGTGAGGGAAGAGACTTTA[C/T]TTTACACTCTATAGAATATTTTTTGATATTTTTAT	T // C	0.698
Affx-961025069	1	109469235	Subspecies	GGAATAGAGTAGAAAGTCCAGGAATAGTATACACA[C/T]ATATTGTCAATTCATTTTCCACAGTAATTCAAAGC	T // C	0.712
Affx-961025070	1	109469580	Subspecies	TGCTCTTTGTAAAATACTGTTAAGGAAATTAAGAG[C/T]CAAGTAATAGACCAGGAGAAAAATATTTGCAAAAC	T // C	0.716
Affx-961025071	1	109470848	Subspecies	ACAAAGCAAGGAGTGGCAACTACAAACAGCAAACT[G/T]CTTTTGTACTGCACATAAACTAAGAAGGGCTTTTC	T // G	0.736
Affx-961025073	1	109472469	Subspecies	GTCATAATAGAGGTCATTCTGGAGTAACAGTGACT[A/G]GGAAATGATGGAGGCTTCTGGGTTGCTGGTAATGC	A // G	0.606
Affx-961025074	1	109472510	Subspecies	TGATGGAGGCTTCTGGGTTGCTGGTAATGCTCTAT[C/T]TCTTGACCTGATGGTAGTAACATAGCTATACTTCA	T // C	0.75
Affx-961025075	1	109472560	Subspecies	TAGTAACATAGCTATACTTCATTCTGTAAAAATTT[A/G]TTCACTTAAAATGTATGAACTTTTCTGCATATACG	A // G	0.66
Affx-961025076	1	109476145	Subspecies	GTAAGATTATTAAAAACTGAAACTGATTAACGGGT[A/G]CAATAGTTAAGAATCTAGGGTATGGAATAAAATGA	A // G	0.698
Affx-961025077	1	109476581	Subspecies	CAATATGTTCATACCTAGTGTGTTAGGTGGCTTGC[A/G]TTATGCTTCAGAGAGCTGTTCCTGACCTCAGACAC	A // G	0.636
Affx-961025078	1	109477161	Subspecies	TAACAATAGAACCACTCAATGGTTCTCAGAGTGGC[A/G]TGTATCACTTCCACTCACATTTCATTGGCTAAAGT	A // G	0.608
Affx-961025079	1	109477226	Subspecies	TAAAGTAAGTCACATGACCAATTCATCAGTGTAGA[C/G]GGACCCTAAACCTCCTGTGAGAAAGGGCCAACAGG	C // G	0.648
Affx-961025080	1	109477855	Subspecies	TTTTTCTGTTTTATAAATCATCTATCTATACATAC[A/C]TATATAAGTAATATTGAAATAGCAATTGAGTAATG	A // C	0.708
Affx-961025081	1	109478097	Subspecies	TTCTAAACTCTAGCAAAATCTTCAAATGTGACCAC[A/G]ATGAAGCTTGGGTAAGGAGCTCAGAGAGAGGGAGG	A // G	0.696
Affx-961025082	1	109478533	Subspecies	AGCTGGACACGGTTTTGGCTTCTGACCTGCACATC[C/T]CTCCACAAGGTTGAGCAAAACATGGAGCAAACATC	T // C	0.656
Affx-961025086	1	109579508	Subspecies	ATGCTCTGCTGCAGCTCCTCTCTGAAGGACACAGA[C/T]AATAGTATTTGGTATGAATTTCCTGAGTTGTGCTG	T // C	0.69
Affx-961025087	1	109582789	Subspecies	CCTTTAGATGAAGCAAATTAAAGTCCTCCTTTATA[C/T]ACTCATCAAAGTGTTTAAAAGTTAGTCCCCAAGCT	T // C	0.748
Affx-961025100	1	110144888	Parentage	AAGACTGAAATAGAATAGAGAACACAGAAACAAAC[C/T]CAGACAAATATGACCAATTGATTTCTGACAAAAGT	T // C	0.67
Affx-961112311	1	110656507	Parentage	GTGGCACATATAAGATACAGATGTCAGTTAAGATG[C/T]ATTGATGTATGAATTAAGGAATGGAGTCAATGGAT	T // C	0.756
Affx-961025119	1	110903727	Subspecies	TGGGCAACAGAGAGGTGGCAATCCCAAATAAAAGA[C/G]ATAAAGCAAACCCAAATGGGGAACATTCTGCAGAC	C // G	0.748
Affx-961025121	1	110996835	Subspecies	ACTTGCTGCCTTTACAAGAACAATGTATGGGAATC[A/G]TCAGTTAATTCAGTAGAGACTCCAGAATGGGCTAA	A // G	0.65
Affx-961025125	1	111211955	Subspecies	TGAAAAGTAGTCAATAGTATTAAAAGGAAAAAACC[A/T]ACAAGGAAAAGTCAAATTGAAGAACACTGAAGAAA	A // T	0.612
Affx-961025127	1	111216868	Subspecies	ACTAAACATGTAGTGTTGACCATGTACATAATTCA[A/G]TTGAGGTTACAACACAAAGAGCTGGGGTCAAGTTC	A // G	0.752
Affx-961025129	1	111221846	Subspecies	ATTGGCAGGCTTAAACTAGGGTGACATGATTAGAG[C/T]AGCAGTTTTATAAGTCCCCCAGCTGCTGTGTGGAG	T // C	0.678
Affx-961025135	1	111577475	Parentage	AGCCAGTAAGTGGTAAGAAAAAGAGACAAGAACTA[C/T]GAACTAAGTAAAGATTAAGGGACTAATGGGCCCAA	T // C	0.722
Affx-961025146	1	112369443	Subspecies	AGATTCAAAGGTCCCACAAAGTGACTGACATCACG[C/T]ACAAAAACAGACTCGTGCTGCTACCGCTAAGTCGC	T // C	0.682
Affx-961025150	1	112544134	Subspecies	TCCTCTACCTACCTCATCACTGTTGGCATTCTTTT[A/G]GCTTTTGTTCTTACTCTTCTTATCTTTCAGTATAA	A // G	0.656
Affx-961025151	1	112560744	Subspecies	GGCTCCTGAATACCACCTATTCAGGCCTCCCATGA[A/G]GGCTTTCTCATTGGGAGGGTAAGTTGCATCTCATG	A // G	0.632
Affx-961025152	1	112575228	Subspecies	GGTAGAATTCATTAAGACCTTGGAAAGTGGGTTCT[A/G]GCTTTCTGAGAAAGGACGTAATTTAAATCAACCTG	A // G	0.714
Affx-961025156	1	112613084	Subspecies	TCTATACAAAAACCACTTTCTTATGATGATGATTT[A/T]CTGTAATATTAATTTTAATGATCACATGAATGTGC	A // T	0.638
Affx-961025157	1	112613292	Subspecies	AGGGTGAGGATGCATTCATGGTTAAATGCGGATGG[A/G]TAATCATGTCAGGTAGAAGATTCTATGGCATCGTT	A // G	0.726
Affx-961025158	1	112620336	Subspecies	CACAAAAGGCTTAAAGCTACAGGTAATAAAAAAAT[C/G]TAAGTGGTTTCCTATTTGGTGGTATCACAAGGGTA	C // G	0.754
Affx-961025159	1	112642713	Subspecies	CCATTACACATCAATTAAATAAATTCTAGGCAGAA[A/G]GGGTCCAAGCACAGTATATTTCAAAAGCTTCCCCT	A // G	0.688
Affx-961025160	1	112668786	Subspecies	GAAACTATAGTGAAGAGAGAAGTCAGAATCTAGAA[A/G]GTATATGCAATATATATAATTGGCAAAAGTTTAGC	A // G	0.702
Affx-961025162	1	112677043	Subspecies	AAGTTGGCTTAAAGCTCAACATTCAGAAAACGAAG[A/G]TCTGGTTCTTCGTTTGATCCCAAAATGGCATCTGG	A // G	0.71
Affx-961025164	1	112677755	Subspecies	GACTGACTACATGATACAGTCACTTCATGTTTATT[C/G]CATCTTACACACATTATGTAGAACTAAGGTAAGCA	C // G	0.668
Affx-961025166	1	112678740	Subspecies	TAATAGAGGCAATAGAGAAATGGAGCTACAGTAGG[C/T]GATTTAAAATTTTTCTTCATGCTCTTCAGTATGTT	T // C	0.618
Affx-961025167	1	112679349	Subspecies	ACCAAATCCAAGTACAACCTGATATTTCGTATTAA[A/G]GACAGAGTTCTCACTTTGCATGATTCTGTTGTGTA	A // G	0.674
Affx-961025169	1	112763684	Subspecies	TGGGGTAAAATGAGACTGCAGCCTGGGAGATAGCA[C/T]CTCAGATAGCTGCTCCAAATAGGCAGTCAGGAAAG	T // C	0.69
Affx-961025176	1	112818969	Subspecies	ACCTAGATTTCTGTTCTCAGTGAACTAAGAATTGT[A/G]ACTTAATCTGTGAAATAATTTTAATCCTGTTTCAG	A // G	0.72
Affx-961025181	1	112979049	Subspecies	AACCGACAAAGACTTTCTCCTTAGCTAAACAAACT[C/G]TAGGCAGGCTCTTTGGAGCCACTTTTTCTACTGGG	C // G	0.75
Affx-961025182	1	112988818	Subspecies	GAATATTAAGAGCACACGCTATATGTTAATATGAG[A/G]CAGTTGATTTGAATATAAGCACTCTCATTCCAGAG	A // G	0.686
Affx-961025183	1	113030543	Subspecies	TCCTCCTGCAAAATGATGTTAGAAATAGTGAATAA[C/T]AGATTAAAGGGCATGGGTTGGGGTAGACCTGCTTC	T // C	0.676
Affx-961025184	1	113030742	Subspecies	ACCTCTCTTCTCTATGGCATGTCCTCATTCAGGCT[A/G]ATGTCAACTCTCACTTAGACTTCTCTTGCCCTCTT	A // G	0.732
Affx-961025185	1	113031832	Subspecies	GCCTTCAAGGTGGGCTTAATTCAGAGGCTAAGCAG[A/G]GTCATCAAAGACATGTCTTCTGTTCTAGCTACCAT	A // G	0.684
Affx-961025186	1	113032795	Subspecies	CCCTGCTGTCGTGTTAGTTTTTCAAATATGGTTTT[A/G]ACTCAGTGGGCAAGCAAAGACAGGTTACTGTTGAG	A // G	0.632
Affx-961025188	1	113065923	Subspecies	AAAATTCAGAATTTGTTTAAAACTTGAGCCAGAAA[A/T]AACAGGAAAGAGAATGTGTTCTCTAGGGCTTATGT	A // T	0.626
Affx-961025209	1	114075530	Subspecies	CTAAGTCTGGTAACCAATGGGGCTGGAAAGGCGAG[A/G]GGCTTACAAACCAGGTTAAAGAGTTGGAAACCTGT	A // G	0.662
Affx-961025210	1	114075902	Subspecies	CTGTCTTGGGCAACTGGATAGCTGCTGTGAACCTA[C/G]TGAAGACAGGAAACTAAGGAAGAGATGCCATTTTA	C // G	0.65
Affx-961025211	1	114075992	Subspecies	TGGAAATAAAATTGTTGTTTCATAATAACAACATA[A/T]ATAGTTGTTTAAAAGTATCTCAAGTTTCTTTATTT	A // T	0.708
Affx-961025213	1	114089124	Subspecies	GATGGAATTCCAGTTGAGTTATTTCAAATCCTAAA[A/G]AACGATGCTGTTAGCATGCTACATTCAATATGCCA	A // G	0.666
Affx-961112534	1	114168795	Parentage	TCAGTTTTACATATGGTAATAATGAATGTTTCCAT[A/G]TTACTGTCTCCATATATCCTACCCTCTCCTTCTCC	A // G	0.732
Affx-961025215	1	114262310	Subspecies	TTGCTTAATCCTCCCACAGTGCTGTGAAGTAGGTT[A/G]TTATCTCTCTTTTGAGGGTAAAGAAACTAAGGTAT	A // G	0.652
Affx-961025216	1	114268012	Subspecies	CTATAGCATCACCAACCTATAGTCTTTTATTGTAA[A/G]CATGTTGATAGGTATGTTGTAGTTTAATAGTTTTA	A // G	0.75
Affx-961025217	1	114276871	Subspecies	GAGAAGTCTATAATGTTGTACCTGAGAATAGGGTA[A/G]CATGAATGTTAATCATTGTGATTGGATTATTCACA	A // G	0.702
Affx-961025218	1	114316295	Subspecies	GAAGCCGGTTGCATACAACATACATTTTTAGAATA[C/T]CAAATTTTACATATTTAGAATATTTAAAATAAAAT	T // C	0.728
Affx-961025220	1	114348857	Subspecies	ACCTGTCAGGCTAAGTTTCTTCACTTAGTGTTTCG[A/C]AAAGTGGGATATGTGTATCTCCTTCTCTGATGGAG	A // C	0.61
Affx-961025221	1	114352738	Subspecies	AGAAATACTTTTACACTGCAACTAGTACACATGCA[C/T]ACAAAATGAAAGTTTTTTGTGAAATAATATTTAAT	T // C	0.74
Affx-961025224	1	114354470	Subspecies	AGGGCAGGTTTATGCCTTGTGATGCTGAAGAGACT[A/C]CTTCCCGTGTGAAATGGGAGCACTTCAGCAGCTTG	A // C	0.664
Affx-961025225	1	114360164	Subspecies	GACAGCCAGTGAATGAGACAACAGAAATTTATACT[A/C]GAGTATTAATGGTAAATATGGGCTAACATTTTCTC	A // C	0.76
Affx-961025226	1	114360873	Subspecies	TTCAGCCTTCCTTCCAATGGGATCAGGCTGAATAC[A/G]CACAGTGTCCCTCAGGATTAGCAGGTCAGAAGAAC	A // G	0.722
Affx-961025227	1	114361398	Subspecies	CTATTTCCAACCATCATCATCTATTTCCAAAATAC[C/T]TTCCTTTCCCCAAACAGAAACGCTGTACCCATAAA	T // C	0.7
Affx-961025230	1	114367585	Subspecies	ATATATTAATATTTACTGACCACAAACTGAGTTCC[C/T]AGAGTTATTCCAGGCACAGTGAAGGTTTCAATGAA	T // C	0.674
Affx-961025231	1	114369864	Subspecies	ATGAAGATAACGCTCTAATGAATGACAGGAAGCAT[C/T]TGCCAGAACTCTTCTCAAAACACCCTGAGAAGAAG	T // C	0.738
Affx-961025232	1	114370724	Subspecies	TCCACTGTTAAAGTGCTGACTTCCAAGGAGAGGAG[C/T]AGTGGGTGATAATATGAAACAAGTATCTCCCAGGA	T // C	0.656
Affx-961025233	1	114371703	Subspecies	GTTTCCTAAGCCATAATATCCTAAGAAAAAGGATG[C/G]CTGTCTGAACGAGGGAGACAGAATTCCATGTCTTG	C // G	0.694
Affx-961112563	1	114764675	Parentage	CAAGTGAAGCAGAGAGATCCAGGAAACTAAAAATA[C/T]TCTTTAGATAGGTAGGGAATCATTTATATCAGTGC	T // C	0.74
Affx-961112572	1	114835119	Parentage	GATTCATTTTACTTTACATTCTCAGGGCCTATCCA[C/T]GATATTGTAAATGGTAACATTTCATTATCTTTTAT	T // C	0.742
Affx-961025245	1	114842322	Subspecies	GTTCCAGGTCTTTCCTGAGATGACTGAAGCTCCAC[A/G]TCACAGGTCTTGCTGTGTGTGCTAAGTGCACTCTC	A // G	0.614
Affx-961025248	1	114895936	Subspecies	AGTCCATCCCTCAGTCATCAAAATTTTATTAAATG[C/T]CTATTCTATGTCAGACATTGTTCTAATTGCTAGAA	T // C	0.728
Affx-961025252	1	115004875	Subspecies	GTTAACCTAGTAAGTGCCCCATAGGTTTCTAAGTA[A/G]TTGACTTAGATTTTAGTTAGAAGTTTTCATAGCTA	A // G	0.804
Affx-961025253	1	115007466	Subspecies	GCTAAATATTTGTTTAATGTTGGGTAGGTATTTTT[C/G]TATTTCTATAAATACATTGAGCACTGTTCTGGGAG	C // G	0.63
Affx-961025254	1	115010121	Subspecies	GAAGAGACTCCACTGGTTGGCAAATAACAAATAAA[A/G]AAGTATTTTCAGGAGAGAAAAACAGAGCTTTTTGT	A // G	0.678
Affx-961025255	1	115011326	Parentage	CAGACAGTTCTTCAGTCAAATAGACTCTTTCATTG[C/T]TTGACTTGTTAACAACCATGGTCTCAGCACTAAAT	T // C	0.76
Affx-961025256	1	115024229	Subspecies	CCAAATTCCAATGTCGCATCTTCTTAGGTGACTTC[C/T]GGCTTCTGGTTCTCTCTTGCTCCTCTCAGCCTGAA	T // C	0.64
Affx-961025257	1	115024386	Subspecies	TGAGTAGATTCATAGACATCATTATATTTCCAAAC[C/T]AACTTGGGGAAGGGGAATCTTGTTATTATATAATA	T // C	0.666
Affx-961025259	1	115032053	Subspecies	TCTCACTTCAGAGTCTACTCACTAGAAAGCATCAC[A/T]TATTATAGCCTTTTATTAATATGTTATAAAAAATT	A // T	0.66
Affx-961025267	1	115346160	Subspecies	GGCTTCTCGTATGATTCCATTTTTCTCTGTTTGCT[C/T]CTTATATGTGATATCCAATTTTTGCTAGCCTTCTT	T // C	0.748
Affx-961025268	1	115367178	Subspecies	TCCAGAAGCACTCTCACAGACAGGCCTAGAAAAAC[A/G]TCTAACCAGATATCTCTACACCCTGTGACCCAGTC	A // G	0.706
Affx-961025269	1	115397310	Subspecies	TCAGTGAGTCATTTATTTTCAGTTCAATGGTAACC[A/G]ACTAAATTTAATATTTATTTTTCTCCTCAGCATCT	A // G	0.64
Affx-961025271	1	115423368	Subspecies	GAGGCGCTGCCAGAGGGCAAGGCAGCTGCCAGACC[C/T]CACTGACTTTGTAAGGCCTGTAAGAAGTTTAAATT	T // C	0.686
Affx-961025274	1	115449278	Subspecies	ACTATATATTTTTCTTTTCACAAATACTCTATAGA[A/C]TCTCTTTACATAAATGTATTTTTTCAAAGAATGTA	A // C	0.67
Affx-961025276	1	115458973	Subspecies	TAAGATTAATATTTTATAAGTTACTTCTTGTTACT[C/T]TTTCCAGTCTAAAGCATAGCTGACTGATGCTCTGC	T // C	0.728
Affx-961025279	1	115509221	Subspecies	TGAGTCTCCAGAGCCCTGTTTTCTCCCAACTTTAA[A/G]TGGAGTTTAACTTTCACACCTGCTAATCAGTGTGC	A // G	0.722
Affx-961025285	1	115705982	Subspecies	TGAATAAAAATTCATGTAATATATGCAGGAATCTG[G/T]GTAGACAAATGGGAAATGTAGCATAGTGAAAGAAA	T // G	0.702
Affx-961025286	1	115706220	Subspecies	AGGAGAATATGACCTGAGCAATATATTAATGTTAT[C/T]GCCAATCACTTAAATTACTCAAGAATACATTATTT	T // C	0.698
Affx-961025288	1	115811381	Subspecies	TGTTTTAAAAGCCTTTTCCTATTCCGAGCCTTGCC[C/G]CTCTGAAAAAACATTTCTGGATATGTTCCTCTCTT	C // G	0.624
Affx-961025295	1	115951805	Subspecies	TCACTTTAATACTCATGATATTCCTTAGGGAACAC[A/G]TGTCAAACCATCTTATTTTTCAAATTGATGAACTG	A // G	0.714
Affx-961025310	1	116399382	Subspecies	TTTATAGGATTTGGACCAATACTTCAGTGGTAATG[A/G]ATTTTTTGTTCAATAGATAGAGATAATATTTAAAT	A // G	0.684
Affx-961025313	1	116470202	Subspecies	TACCATCTCCTTTAGGACCCTTTATACATTGTATC[A/G]GAGAAGGCAATGGCACCCCACTCTGGTACTCTTGC	A // G	0.714
Affx-961025346	1	117606874	Parentage	TTTTAAGACAAAGAAAGAGGTTCACCCATATCCCA[A/G]TGCTTTAAGACAATACTAAGCTGTACCTGGAGTAC	A // G	0.684
Affx-961025380	1	118820312	Subspecies	AGAGAAAGGAATTCTCTACACAACAATCTTATCTG[A/G]TATCTTTAAATATAAAACATATTGTGCCTATAGCT	A // G	0.62
Affx-961025381	1	118832858	Subspecies	ACGTCTCCAGTAGGCATAAGAGAAAGGTGCCTTGG[A/G]CCCATAATAATATAGAAGCACACAAAAAGGTTTTT	A // G	0.64
Affx-961025388	1	119113784	Parentage	CTTGATAACCTTGTGGAGGCTACTGTCTTTATGAA[A/G]GCTCCTGGCTGAGGAAGGGTGGGTGGTGCCTACTG	A // G	0.712
Affx-961113041	1	119260118	Parentage	AGGTCATCAAATGTCTGAGATGCATTTTCAAAATT[A/G]TACTAAATATAAAATTAAAAACAATCAGGTTACAA	A // G	0.732
Affx-961113074	1	119606548	Parentage	TCAAGACCAAAAAATTAAAATACAACACCATAGAA[C/T]TGAAAGTTTATAGAACAAAAATCCAATAGTCAGGG	T // C	0.778
Affx-961025406	1	119844795	Subspecies	TAGGAACCCTGGATGGAGATATGGAAAAATCTATC[A/G]ATGAGTATTTCATTCTGGTGTTTTCTATAACTGAT	A // G	0.722
Affx-961025418	1	120310243	Parentage	AACAGCCTAATTGCCTTATAGATAGTTTTCTTTTT[A/G]GTATTAAATTGAAAGTTGCCTTTCCTAATCTTTTA	A // G	0.606
Affx-961025438	1	121321673	Parentage	CTTTTATTTAATTCATTATAATTGGTACATAATGT[A/G]CCAATGTTTTATTTACTACAATTTATTTATCCATT	A // G	0.668
Affx-961025469	1	122535812	Parentage	CCATGAAACACACTTAGAAAGATGAAAGAAAAAGT[A/G]AGATTCATTTACTCCCAGGATCATTTGTTTACTAT	A // G	0.73
Affx-961113411	1	122544211	Parentage	TTATTGAGGCTGCGTCCTGTTCTGGTATTACCCTA[A/G]ATTTCTATATCATAGTTCATGGTAGCACTATCCAT	A // G	0.732
Affx-961113461	1	122789752	Parentage	TCTCATTTTCATCAAGAGGCTCTTTAATACTTCTT[C/T]GCTTCCTGCCATCAATTAGTTATACTTTATACTGT	T // C	0.766
Affx-961113502	1	123325022	Parentage	AAGGTGGAGCCAGCAGTTGCCAGTTTGATTATGAA[C/T]TGTTGTATAAGTAGATGTGATAAGTTAATATATAT	T // C	0.734
Affx-961113521	1	123474855	Parentage	ACAACCTTTTGAACTGTTTATAATTTAGTGCAATA[A/G]TATCTCTCTTTAATAGTGTTAAATTCCTATTTATA	A // G	0.776
Affx-961025491	1	123622778	Parentage	GTTAAATTTAGTGATCAATTTGTAGAGTTTTGTTT[G/T]AAAAAATGTTTGGATTTTCATTGAGCTTTTCTAGA	T // G	0.708
Affx-961113531	1	123669677	Parentage	GCTTGAAGGATTTTGAGCATGACCTTGATAACATG[C/T]GAAATGAATGTAGTTATATGGTAATTGGAATATTT	T // C	0.792
Affx-961113567	1	123926079	Parentage	CAAAAGTTTAATGTTTCTAAATACCTTGTATCACA[A/G]CTTAATTTTTTATATCACTAAGCAGAAGGTTGTTT	A // G	0.766
Affx-961025504	1	124156945	Subspecies	CGGATGCCATGATCTTCGAGAGGTCAAGTATAAGC[A/G]CTTCTGCTAAGAGTCCCACTGAACCCATCCTGTAG	A // G	0.688
Affx-961025506	1	124160493	Subspecies	CAATCACCAGTATGTTAAACTTAGGACTAATGATA[C/T]ATGAAGAAGCCAAAATTAAATCAGCTCACTTTGTC	T // C	0.73
Affx-961113633	1	124475138	Parentage	ATAGATCCCAGTTATCTGTTAATTGTTCTTAAGTA[C/T]CCCATTTCTGAATCACACAAAAACTTAAAATTTGA	T // C	0.746
Affx-961025518	1	124908900	Subspecies	GCTATAAACATTGGACACATAAATATTTTCAAATA[A/C]GTGTCTCTTTTTTTGTGGGTATATTCCCAGTAGTG	A // C	0.662
Affx-961025519	1	124912888	Subspecies	TTCCTTGCCCACGGCAGTTCAGAGCCATAAATTCA[A/G]TTTTGTCTCCAGCTTCTTAAGCACATGGCTTCCAT	A // G	0.716
Affx-961025520	1	124914034	Subspecies	TATCTCCTCCTGATTTATCTACAATCCTGCTTTAT[C/T]TACAATCTACATTAATAATATGTTAACCATTCACT	T // C	0.734
Affx-961025522	1	125010403	Subspecies	AGAGGGTTATAAGAAACAGAGACTCCACTCTTAAC[A/G]GGTTCACACAAAATTTCACACACTCCATGACCTAG	A // G	0.632
Affx-961025523	1	125025840	Subspecies	AGGGCCTGGGAGGGGCCTGTGTACTGGCCAACACA[C/T]TATGCTGTTTTCTTACATTGATATAAGTGGCCCAA	T // C	0.656
Affx-961025524	1	125027841	Subspecies	TAAAATAATTTTATTTGATAAAATAAAATTAAGAG[G/T]TATACAAAGATATGTAAGTAATCAATGGCTCAGTG	T // G	0.716
Affx-961025525	1	125032834	Subspecies	AAGCTAATATTACATGGCAGAGCAATTCTTTCATC[A/G]ACTAAACATGTTCTATTCAGACTTTTCATGTATAG	A // G	0.704
Affx-961025526	1	125033190	Subspecies	GGTATATTACTGTACAGTTTAAATGTGAATAGAGC[A/T]CACTAAAGCAATTTAAAATTTCAGTAGGGAGCATA	A // T	0.638
Affx-961025527	1	125034570	Subspecies	AAGTATGTTATTAACAATATTATTAATAATAATTA[C/T]AATGATATTGTTCTCAAAATTCACTGACCCTCTAC	T // C	0.698
Affx-961113700	1	125279088	Parentage	AAGAAATGTACAATAGGTGGGAAATAATTCATTAG[C/T]TCTATTACCTCAGGTTAATTCAGTGTAATGAATTA	T // C	0.76
Affx-961025537	1	125903031	Subspecies	AAGGATCATAGAATCTACTCATTAGTATCTTAAGG[A/C]TCTATCATTTTGTTGAAATTTCAACTTCCTTTACA	A // C	0.728
Affx-961025539	1	125973927	Subspecies	AGGCTTCTTCTGTTGCATTTCCCAGCTGAAAACTA[C/T]TGTGGTACATCACCTTTTCCTTCTTTATAACACCC	T // C	0.692
Affx-961025540	1	125977700	Subspecies	GAGGGCAGAGACGTGGCTCACATAAGAAATAAGGC[A/G]GGAAAAAACATATTCACACAAAATGGTGAAAAGTG	A // G	0.722
Affx-961025549	1	126361843	Subspecies	TCCATATCCTTACTGAATCTCTTTCCAGAAAAGAG[A/G]TTTCACAAAACAGATTCACTTAAATTACACTAATT	A // G	0.748
Affx-961025550	1	126364159	Subspecies	TGTGCCTCCGGGGTACTCGCATTTTAATAGGTGGT[A/T]CTTTAAGTGTAAATAATAATGAAAGTTGATACAGA	A // T	0.642
Affx-961025551	1	126364244	Subspecies	AGCCAGGTGCTGACTAACTGCCTTTCATGGATGTT[C/T]GGATTAATTTACAGAAAGACCCAACATTAGGGACT	T // C	0.7
Affx-961025552	1	126366129	Subspecies	GGCTGTGTATGGGTTCCCTAAGAATACCTCATGTA[C/T]GTCCTTGAAATGGTGCTTACACACAATAGTTTCTC	T // C	0.706
Affx-961025566	1	127083271	Parentage	TGTGTTTCCTTAACAGTTTAACGACATTTTAACTT[C/T]TCCTATTTTTGTTCACCAACCTCTTCAGGTCTTTG	T // C	0.764
Affx-961113893	1	127997724	Parentage	ACTTAGTATTTATTCTGTTCCCATGCCTTGATTTT[C/T]TTCTTCAGAAACTCTTATTGTCCATATATTCTTTG	T // C	0.786
Affx-961025587	1	128331853	Subspecies	GAGAAGCTGGGGGTGCCACAGAAAATATGGAAATA[C/T]TGCATGGAACCTACTTACACTAAAAAATTCATTGT	T // C	0.738
Affx-961025620	1	129949939	Subspecies	TCAGGGAATCTGAAAGTCCATCTGGATGCAAAGAA[G/T]AACAAAGAGACATAAACTCAACATGAACAGTCCAT	T // G	0.664
Affx-961025621	1	129987090	Subspecies	TAGATGAAAAACAGTCCCTGTTCTAGAAATGTCTC[C/G]AGGGAAGCTGGGAGACTAGGAGAGGGAAGGGAGGG	C // G	0.628
Affx-961025623	1	129989201	Subspecies	AAACAGATTTATCAATAAGGAAAGGCAGCGATGTA[C/T]AATGCCACCTGAATCTTCAGGGCAAACACTTGACA	T // C	0.638
Affx-961025624	1	129992064	Subspecies	GAGACTTGGATTTAAGCATTCAGTCAGTTGCCTCA[G/T]GCTGTCACCCAAAAAATTACTTATTAATTTCTATG	T // G	0.662
Affx-961025625	1	129992190	Subspecies	AACCCCCATGTTCTGCCTTTGTGCTTTCTGTCAGC[A/G]TCTCAAAAATTTTATAATATAGAGTAATACACATT	A // G	0.642
Affx-961025645	1	130661284	Subspecies	ACAGGAGATGGAAAAGGTAACTGTGGTCCAGGTTG[A/G]GGGTGGCTCTGGGGGTGCAAGCAGCTTCATTCTGA	A // G	0.654
Affx-961025647	1	130665017	Subspecies	TGTAGCCATCCAGGCCAGGCTGTAGGTGGGGTCCC[A/G]TTGTCTCCGTTGACCAAATCTTTTCAATCACTACA	A // G	0.694
Affx-961025648	1	130677324	Subspecies	GAGTATATGGACCAATACATTATTGATTAACTCAC[C/T]AATGCTTTCATTTAATTTGAAGTCTTAAAAAGAAA	T // C	0.656
Affx-961025650	1	130700524	Subspecies	ATCCTAGTAACTCAGAGAAATCTCTGTCAAGTTTG[C/T]ATTTTCAGTCTCAGCCTCACCTTAACTTGCAGGAC	T // C	0.722
Affx-961025651	1	130700924	Subspecies	TCTTTGGTTTTCCAAATGCAATTACCTGGGTAGTC[C/T]CAACAAACACAAATGGGGAGAAATCCAATCTCAGT	T // C	0.634
Affx-961025652	1	130700975	Subspecies	GGGAGAAATCCAATCTCAGTCATGTCCACACTCAC[A/G]ATCAGTGTGAACGTCTTTGGTTTTCCAAATCTAAT	A // G	0.7
Affx-961025653	1	130701651	Subspecies	CTTTGGAAATGTTTCCATCAGAGCAGTCTTGGCAG[C/G]AGACCCGAAGCTCAGTCCTTGTGGAATCACTCCCC	C // G	0.62
Affx-961025654	1	130704828	Subspecies	TTATTAAAAGAAGACATTGGGACAAGCCCTCATGC[A/G]CCAACATTTTTCTCCTTTGTTCCTTCCACAAATTT	A // G	0.704
Affx-961114158	1	130925333	Parentage	ATAAAATGGGCAAACTCATCAAGACTAATAAAGGA[A/G]AAAAGAGAAAAGTATAAGCAAACAGGATGAAAAAG	A // G	0.752
Affx-961025660	1	130925924	Subspecies	ACAGTAATAGCTAGTACTCTGAATCCAAAAATGTA[C/T]TTAAAAGAATACATTATAATGAAATAAAATTTTAA	T // C	0.734
Affx-961025661	1	130926881	Subspecies	GCTGAAGAATAATCTGGAAGCAATTAATGAAATTT[C/G]GTATGCATATTCCCTATCAACTATCAGCTCCATTC	C // G	0.77
Affx-961114159	1	130927540	Parentage	TATTAAAACTAAAAGAGAATTTAGCAAGTTAGATA[C/T]AATATCAAGTTACAAAACTCAGTAGCATTCTCTAA	T // C	0.776
Affx-961025670	1	131195430	Subspecies	TACAAGTATCTAGCCATCATGTTTCCTTGAGCTGC[A/G]TGACTCTGTGCTAATCCCTCCCCCATACAGACCTC	A // G	0.612
Affx-961025672	1	131210336	Subspecies	GTTCAACCAATATTCACTGAGGCCAAGTTTCAGGG[A/G]ATACAAAAGTCATCAAAAAAGCTAGTTCCTGCCCC	A // G	0.674
Affx-961025675	1	131231683	Subspecies	GGCAGACATATACATGGACATCCATAGCAGGCTAG[C/T]TGGTAACCTTAAAGAACAGGAAATAACCCAATGTC	T // C	0.734
Affx-961025677	1	131265689	Subspecies	TGACATAAACCAATAAATTTCCTTTAAAAACCAAG[G/T]AGGCAGCTTGAGTTGAGTTTCCATCAATTGTAAAC	T // G	0.682
Affx-961114465	1	133849308	Parentage	CAAGTTGTAGCTTTTTTGACAAGGTACTATAAATA[C/T]ACTACTTATTACTTAAAAGTTACCTGATACTATAT	T // C	0.754
Affx-961114482	1	133913643	Parentage	ATATTGTATTTGGAAAACCTTAAAATGTCCACTAA[C/T]GTAGTATTAGAACTAAGAAATGCATTTAGTAAAGT	T // C	0.754
Affx-961025764	1	135078230	Subspecies	ACAAGCTATGCTGGAAAGAGCCTCACTCATCTTAG[A/G]GAGTTGATATAAAAAAGTGATTGGATTCTGGGGGT	A // G	0.766
Affx-961025769	1	135304954	Parentage	TTCTCCCAATGATTAAGCATCTCAGATTCCAAATG[C/T]GAGAATAGATTGATAATTTTTTTCCCCTAGGACAA	T // C	0.736
Affx-961114608	1	135687494	Parentage	CCAACTTCTTCCAATCAACAGCCAAGATTGAGACT[C/T]GGATTGTTCTAGATTGTTATAGTTGAGACTAAATT	T // C	0.728
Affx-961025782	1	135749096	Subspecies	CCAGCCCCAGGTCCCTTCACCCTACCCACCACAAA[C/T]GAATTTCAGCATCATACCTACTTATCCCAATCATC	T // C	0.668
Affx-961025798	1	136186000	Subspecies	TTATTTCAGGCCTTGTATGTCTGGAGATGTCTATC[C/T]TATCCTCATGCTTTTAGGTGATTTGACAGAATTTA	T // C	0.694
Affx-961025804	1	136405868	Parentage	CAGGTTGCTGCTAGCTAGACTTACTGTGGTGACCA[C/T]TTGCAACATAAACAGATATTATGTTGTACACTTGC	T // C	0.67
Affx-961025810	1	136636815	Subspecies	CTAAATCTCCACATGTTCCGTAGTTAAGGGAAACC[A/C]CTAGAATGGTCATTTCTAGTGTACATTTTAGTAGC	A // C	0.742
Affx-961025822	1	137319955	Subspecies	TACAGGCCAGTTCCTGATTTCTATCTGTTTCTTGT[C/T]AAATGTTTCTCTAGTGCTTTGGGTCTCATCTAATA	T // C	0.618
Affx-961025824	1	137382503	Subspecies	GGTCCTTCGAAGCTTTGAAGCCAAGCACTGACTCG[G/T]ACTCTCAAGCTATGAACGTCCCAGATGGCATCTTC	T // G	0.64
Affx-961025826	1	137409351	Subspecies	TCTGAGAGCTAGAACAAATGAGTACACACACTTCA[A/C]CAAAAAACACAGGGCCACTTCAACAGGCACCTCTC	A // C	0.62
Affx-961025831	1	137465675	Subspecies	GTGGTTTTCTTTGTTGTTGTTTAAGAGTTTTCTCT[C/T]ACTTTTAATTGAGATCAATTCCTCTGTCTTCTCAT	T // C	0.722
Affx-961025835	1	137544541	Subspecies	TCCCATTTCTGCACATATGCCCAGGCAAAATTCCA[A/G]TTCAAAAAGATACATGGACCCCTATGTTCATAACA	A // G	0.7
Affx-961025837	1	137602691	Subspecies	AAAATCTAATAACTCCTCAATAGGTTTAATAACTC[C/T]TTTGTTAGGTTTCTGTAATTTGCCATCAAATATTA	T // C	0.724
Affx-961025838	1	137606738	Subspecies	AACTCACAGTGAGACTGGAATGTCACTTCCTAATT[A/G]TCAACAAAGTGAATCTTTTCACACATTTGGGAGAC	A // G	0.624
Affx-961025839	1	137621211	Subspecies	GAGGTTACAAACTTGGAGATGTTGGTGTTTGATAT[C/G]CTAAGTTTATGAGTCTCTAGATTTGTTCTCAACTA	C // G	0.72
Affx-961025840	1	137622460	Subspecies	CAGTTCTGCAATCACAGACTTACCAAGCTTGAATG[C/T]ACCTTAGGAATCCGCCAGTGGAAGACATAGTTCAA	T // C	0.69
Affx-961025845	1	137650609	Subspecies	CCTGTACATCAACTACACTTGCCAAATGTACTACT[C/T]TCATTAACAAACTGTAATTTTTAACCAAAGAATTC	T // C	0.716
Affx-961025846	1	137650877	Subspecies	ACAGTAAGGGCTCAAACATTTCTCCAATAATCACC[C/T]ACTTGCCACTACTCAAGTACATCTCAGGACTATTT	T // C	0.634
Affx-961025849	1	137657272	Subspecies	AACTTCATTTTATTTGAGTACTTGTGAGGTCCTTC[A/G]TTCTCTTGTAGTCACTGGAGCAGTGAATATTCATT	A // G	0.618
Affx-961025856	1	137705336	Subspecies	ATAAGATTCTATTAAATGTATATACCACATTTTCT[A/T]TATCCTTTCATCAGTCCACTGATGGACACTTCCAC	A // T	0.642
Affx-961025862	1	137816567	Subspecies	AATTGAAATGTTTGTTAATAAGAGATTAGTTAGAT[A/T]ACTTATCAGTCATCCATATACAAGGATACTCTACA	A // T	0.71
Affx-961025866	1	137870246	Subspecies	CCACACAGATAGATATACATACCATAACAGTTTCA[A/G]TGTATCACCAATCATCAGTAATACTAACATAACTT	A // G	0.642
Affx-961025871	1	137978251	Subspecies	CTTTGTCAATTTGACATGTGAAAAAAGGGTATCTC[A/G]TTTTAATTTCCAATTGTGCAAAGGCTTGAGCATTT	A // G	0.66
Affx-961025873	1	137981642	Subspecies	CAAGCAATTCAAAGAAAATCCAAAGTCCTCTTCTA[C/T]CTCTTTCATCCCACTCAGGGACCAAGTTCAAAACA	T // C	0.686
Affx-961025875	1	138002871	Subspecies	AGACAACTCTCAGGTGTACCTTACACTGTAGAGTC[C/T]CCTCCTTACCATGAAATCAAGCTGAAGTTACCTTC	T // C	0.676
Affx-961025876	1	138022226	Subspecies	CCCTGAATCCTCCTCCTTAGGGCAGGATTTTCTGG[G/T]TTCATTAGTTTTATCAGAATGCTGAGATGTTACAG	T // G	0.658
Affx-961025880	1	138044858	Subspecies	ATTCCCTTGATATATATTGTTACAAAGTAGAATGA[A/G]GAAAGCTGTGTTATTGATTCCAAATTACACAACTC	A // G	0.738
Affx-961025881	1	138047606	Subspecies	ATCTTTAGATCTAATTTCATTAGTGAAATTCAGTT[A/G]ATATTGTTTGGGGTAAGGGAACCAGAGAATATATT	A // G	0.672
Affx-961025882	1	138095600	Subspecies	TTCTTTTCCACTTTGTAAACTTAATGTAGCAAGCA[C/T]AACAAGCCTGGGCTTTTCAAAAATATTCCTCCCTT	T // C	0.674
Affx-961025883	1	138108058	Subspecies	TGCAGCCACACCAAATACTGTGTATATGGCTGGGT[A/G]GTTATATCAAACTAAGTCTTCCATTTAAAAATATT	A // G	0.676
Affx-961025885	1	138156732	Subspecies	AACATCCAAAAGTCCTGGATAACAGATAAACCCTG[C/G]TTTATGGTGGCTCAGTCGTAAAGAATCCATCTGCC	C // G	0.668
Affx-961025886	1	138162705	Subspecies	CTTTTAGGCAAGAATTTAATTCTTAAAAATTGGCT[G/T]TATTACTTTGCTCTTTTGTGAATAAAAAATGTTAA	T // G	0.67
Affx-961025891	1	138269959	Subspecies	GCTCAAACTACCACACAATCACATTTATCTCACAC[A/G]CTCGTAAAGTAATGCTCAAAATTCTCCAAGCCAGG	A // G	0.624
Affx-961025893	1	138278174	Subspecies	CTTTTTAAACAAAATTGAGGCTGTCATTTATACCA[C/T]TTAGCTTGTTTTCACAGAATATTAACCTTTTTCCA	T // C	0.772
Affx-961025894	1	138278284	Subspecies	CAAGAACAATGTTACTCAAAGTGTACCTGTAAACA[C/T]CAAGTGCAGAAATTAAGTGTTCAGAAATGCTTGTT	T // C	0.68
Affx-961025897	1	138282466	Subspecies	AGACTTATTGACAGCACATTCCTAAATTAATTTTG[A/G]ACTAATTCCAATTATTATCTTCATTTGGAAATATG	A // G	0.738
Affx-961025909	1	138505740	Parentage	CAATGTAAAGTAAAAATTAAATCGAGAAATAAAGC[A/G]AATTAAGGAAAAAATGAACTTTTCCAATACTTTAG	A // G	0.642
Affx-961025933	1	139527111	Parentage	CTGACTTACTTAGTATGATCATCTCTAGTTGATCC[A/G]TATTGCTGCATTATCTCATTCTCGTTTATGGCTGA	A // G	0.656
Affx-961025935	1	139556177	Subspecies	GTACTTTTTTTGCTTGATTTCACCATCATCTTCTT[A/C]AATCTTTCAATTTGTATTCTTACTCTAATATAAAC	A // C	0.746
Affx-961025936	1	139624007	Subspecies	ATTCAGCCATATATTGTCTCTCCCACCTGAGTGCC[C/G]CCCAGGAAAGCAGCTCATGTCTACTTAATTTCAAA	C // G	0.666
Affx-961025950	1	140346883	Subspecies	TTCCTGTACACTTGTAACAAAACAGTTGTTATTCT[C/T]TGTTTTGAGAAAGGGAAGGAGAGGCATTAAATTCT	T // C	0.7
Affx-961025955	1	140498583	Subspecies	CAAAGTATTGAAGCTTCAGCGACAGCATTAGTTCT[C/T]CCAATGAATATTCAGGGTTGATTTCATTTAGGACT	T // C	0.674
Affx-961025968	1	141007733	Subspecies	ATTCACTCTTTCAACACACAGTTGAGTGCTTACCA[C/T]GTGCCAGGAGCTGTGTGAGGTGTGGAGGGTATAGT	T // C	0.672
Affx-961025970	1	141032313	Subspecies	TTTAGAGATAGATGTGGGTGAAGAGACCCTGGGAG[C/T]AGGAAAAGGTTGTGTCTTCGTGTCTAACCATCCCC	T // C	0.736
Affx-961025981	1	141509316	Subspecies	AGGAGTAATTTGAAGAAGGTCAACTCCAAAAGACC[A/G]TTTGCAAAGGTGACTGCAAATGCCAGAGACCCCAG	A // G	0.698
Affx-961025984	1	141512009	Subspecies	CTTCACAGGATTTGCTACCTATGAGTGAGAAGCCT[A/G]ATTACTTGCAGATTACTAGATTTAATTCAATAAGA	A // G	0.816
Affx-961025985	1	141512168	Subspecies	TTCTTTTGCCACAGCTGTGCTGTCCTAGCTGCCAC[G/T]TTCCTTTTGCCTGTTGGGATCTGAAATTGAGTCAA	T // G	0.666
Affx-961025988	1	141517622	Subspecies	AAGTGATGTCTCTGCTTTTAAATATTAGATGAACT[A/G]ATACTTTGAGGCTACTTGAACATGTACTGTGATTA	A // G	0.718
Affx-961025990	1	141520692	Subspecies	GGGAACAATTAAATGTCTGCCATTTAAGCCACACT[A/G]ACTGTGGTAGTTTGTTGTGGCAGCCCTAAGCAGAC	A // G	0.688
Affx-961025991	1	141524023	Subspecies	ATTTGGATACAGGCCCTTTAGAGAGGTGATGCAGT[G/T]AAAAGGGCTCAGCAGGTAAAGAATCCATTTGCAAT	T // G	0.688
Affx-961025992	1	141530128	Subspecies	CCCTCATTCAGTCAGTAAATCTCACATGTGTGTGC[A/G]TAAAAGCTCAGTGCCTCTGTTAGTTGGAGCTGTTC	A // G	0.72
Affx-961025993	1	141530728	Subspecies	ATAGTAGGTCCTTGTCACTTACTTTATATATGGTG[A/G]TTTGGTCACTAAGTTGTCCTCGACTCTTGAGACCC	A // G	0.658
Affx-961026017	1	142859212	Subspecies	TGTCTCCCAAAAACCACCTCGGAAGGTTCTGCTTG[A/G]CCATGACAGCTTTTAAAGAGAAACAGAAGTAATCT	A // G	0.626
Affx-961115276	1	143716215	Parentage	CGTTTTTTTTAATTAGAGTTCTCAACTTTTCCATA[C/T]GTATGCCCAAGAGAGGGATTGTTGGATCATAAGGT	T // C	0.736
Affx-961026037	1	144164816	Subspecies	CTGATGTATGTTCTCCTGAATTCACACCAGGCCTT[C/G]TCTAACTTGTGGATTCATTTCCTAGATGAGAAGTA	C // G	0.62
Affx-961026064	1	145586535	Parentage	AACCCGCCCTAAAATGCAGAGCTCAGTTTCAGGTC[C/T]CAGGCAACATGCTGCACCCCTCCGCAGCCTGCACC	T // C	0.624
Affx-961026075	1	146026504	Subspecies	GCCTGGAAGCTTTTTCTAGATCAGCCCACACCTGT[A/G]CACATGACCTTGGGAGGAAAAAGAACTTTGCAGAC	A // G	0.682
Affx-961026078	1	146032474	Subspecies	GAATGGTGGCTTCTTAGATTTTGTCCTGGAAAAAG[C/G]CCTCCTGGAAATCCATTATTTACTCTTAAAAATCA	C // G	0.664
Affx-961026079	1	146039694	Subspecies	TTCTCCCTATCACTTCTTTTTTGATGCTGTTGGGG[G/T]GAATACTTTTTGATGCTTTGTCTTTTGCCAGGTAT	T // G	0.672
Affx-961026081	1	146042957	Subspecies	CCAGTGGGCACCTCTATTCCCCAAGTGGGTTACAG[C/T]GCACTTTAGGCACCTGCTTACTGTTCCCTATACTG	T // C	0.612
Affx-961026093	1	146662473	Subspecies	GATAAAGTTTTGTGTCTCTCGGGAATTCTGGAAAA[A/G]TTTCAGCCATTCTTCTGTTGACTTTTGCTTCAATT	A // G	0.792
Affx-961026097	1	146739001	Subspecies	TTAACTTTTTGTTTGCAAAAGTATTTTGGACAGAA[A/G]TGGAACTGTGAATGAGATACTGAAATGCACTAAAT	A // G	0.732
Affx-961026098	1	146753883	Subspecies	GCCCTTTCACAGCTCATCAGGGTCATCCAGACACC[C/T]GCCCAGTGCATTAGGGATCCCGAGTTCTGGGGCAC	T // C	0.618
Affx-961026099	1	146758638	Subspecies	TCCCTGAAAGTAAAGTTCAAAAAGAGCATTTATTA[C/T]GTGTGCTAGCCAAGTTCCTGGTCAGCATACTAAAC	T // C	0.67
Affx-961026100	1	146761481	Parentage	TCTAATTCACGAAGGAGATATTTCTCCACATAACT[A/G]TTCAGTTCAGTCACTAAGTTGTGTCCAACTCTTTG	A // G	0.672
Affx-961026101	1	146788246	Subspecies	AGTCATAACAAAGATTTCACTATTTTATGGTGTCA[A/G]TGCTTTTAAAAATTAAAAATCTAAAATTTCAGAAT	A // G	0.694
Affx-961026102	1	146789737	Subspecies	ACATTTACTGGACGGAGTGCTGTGTGAGTATTCAT[C/T]GTGGGGAACATTATAATGGGTTGAGAACTCACAGG	T // C	0.656
Affx-961026121	1	147680534	Subspecies	AGCCTGCATATATGGTCTTCTAATATTTAACAACA[A/G]AGCCCAGAATATTCAATTGAGAAAGAACAGTCTCT	A // G	0.728
Affx-961026123	1	147701733	Subspecies	ATCCAGGTGTCAGCGATCACCCGCTTCCCTTCCAC[A/G]CTATCTCACGACAGCTACGAAGTCCCTCGAGGTCA	A // G	0.642
Affx-961026125	1	147733843	Subspecies	CAGACAACCACTTTGCCTTCTTGCATTTTTCTTTG[C/G]GATGGATTTTGTGATCACCTCTGCTACAATGTTAC	C // G	0.632
Affx-961026130	1	147762371	Subspecies	CCTCGTGTGAACTGTCGAGAGGAATGTGGAGCGAG[C/T]TCTCTCTCCATTTAGCTCTCACGGTGTTTACTGTG	T // C	0.752
Affx-961026131	1	147764784	Subspecies	CGGTCCATGATGAACAGGTTTGAGCTTCGAGAATC[C/T]GAAATGAGGCAACTTCAGGACCAGCAGGCAGCTCA	T // C	0.792
Affx-961026134	1	147783748	Subspecies	TTCCCAAAGTTGCCCTGTTAAAAAACAAGCATTTT[C/T]AAGTGAAATGTCACTGTTGACATCTCAGGAACATG	T // C	0.728
Affx-961026135	1	147784899	Subspecies	TCTACTTTCCAATGTGTTTCACAGCTGGAGGAAGC[A/G]CGTCAGATCCATTCTCGTTTTGAGAAGGAATTCAG	A // G	0.7
Affx-961026136	1	147791610	Subspecies	ATGTTAAATGTTCCTTGGAAACTTATTAACGGGCT[A/G]TTCACCTTCATTGTACAGAGGTGTTGTCAGCCATT	A // G	0.652
Affx-961026140	1	147885961	Subspecies	CTGTGCCAAACCCAAGATCACAAAGATTCTTACCT[A/G]TGTTTTCTTCTAGAAGTTTTGTAGTTTTAGGTTTT	A // G	0.634
Affx-961026144	1	147996316	Subspecies	GTTGGTATGTCATTTCCATAGCAAATAGCTCAAAG[C/T]CCACAGTCTGGCCCAAGATGGAGTCCTGCTTTCAA	T // C	0.614
Affx-961026146	1	148012205	Subspecies	CTAAGCTTTTTCTATGTTTTAAATCAATAATTAAT[G/T]ACAGTAGCTACATTTGTTGAGCTGCACTTGGTAAG	T // G	0.68
Affx-961026149	1	148058153	Subspecies	CTGGGAGGTGCAGACCTTGGTTCCTGTTAGTGGAA[A/G]CGTTTTAAAGCCCCAGATAGGAAATTTTAATTGGA	A // G	0.664
Affx-961026150	1	148058420	Subspecies	AATTTCATTTCCATTCATTCTTCACATTCCATTTG[A/G]TAGAAGACCTTTTTCATGGACCTTAAAAGATAAGT	A // G	0.76
Affx-961026151	1	148058905	Subspecies	TGTTAAAAACATCCCAGACAGAATATATTAGACAC[A/G]GGTTGGATATTAGAAAAGATTTATATATTTATGCT	A // G	0.648
Affx-961026224	1	151250102	Parentage	AAATGTCACTGATGTTTTGACAGAATTTGCATTAA[G/T]TATGCATGATGCTTTGCATATTATGAACATTTTAA	T // G	0.628
Affx-961115838	1	151255713	Parentage	AATTCAATAGGAGGACAAAATAATCACAAACATAT[C/T]TGTATCTAATAACATCTTCTGTACATAAAAAGCAA	T // C	0.774
Affx-961026228	1	151365178	Subspecies	AACTGTTGTAGGATGATAGTTTTGTAGGAGGGTAA[C/T]GGTGATAATTAAGCAGCAGCTATCCATTTCTTGGT	T // C	0.682
Affx-961115852	1	151410469	Parentage	TGTTTGAGTGGAGGAATGGTTAGGCAGCTAAATGC[A/G]TAGTAGTGGTTCAGTTAAAACAGGAAAGATGGAGA	A // G	0.798
Affx-961026231	1	151446505	Subspecies	CTGACCCCACCATCTCTAGGACTGTGAGAAGACAC[A/G]CGTCTGCTGTTTAAGGCCCTGTACCTTGTTAGGAG	A // G	0.63
Affx-961026234	1	151502639	Subspecies	TCCTTTCCCAGGAAACCATTCCCGAGGACTTACAT[A/G]GAAGCTGACCTGCTTTCTTTAAATTTCAGAACAGT	A // G	0.662
Affx-961026238	1	151585180	Subspecies	CAGTGAAGGCTGCAGACTCCTAGTGACGATGCTCA[C/T]ACCATGTCCTCATGGTTCACAAGGACAGACGTGGT	T // C	0.652
Affx-961026243	1	151635498	Subspecies	CGTGTGCTCAGTCACTCAGCTGTGTCCGACTCTGC[A/G]GACTTACTTAATATGGTAACTTCTAAAAACTTCTT	A // G	0.748
Affx-961026246	1	151667396	Subspecies	CCAAGTCCTCGATCAGCAAAGTAGATGATTATGAC[A/T]TCGGTTATATTTAAAATGAAGTCGCATCAAGCCAC	A // T	0.682
Affx-961026253	1	151899662	Subspecies	TGCTGAGATGATTTGACATTTAAGAGGAGAGAAGC[A/C]TAACAGAGTAGAGATTCTGGCTCGTGGAGCCAGGA	A // C	0.718
Affx-961026258	1	152121148	Subspecies	CAAATTAAAAAGGGCCTCTATCTGAATCTCTCCAC[C/T]TATCCTTAAACCATACAGATTGAGAACCACACAGA	T // C	0.712
Affx-961026261	1	152128752	Subspecies	GCCATTTCCTACTCCAATAGCATTGTCTGGATGCA[A/C]CATAATTTTTATGCATTCACCTCTTGAAGGACATC	A // C	0.718
Affx-961026262	1	152129076	Subspecies	TGTCATTGTTTGGGATTTTGCCCATTTTTTAACAG[A/G]TGTATAGTGGTATTTCCTTGTTTTAATTTCTAGCT	A // G	0.606
Affx-961026263	1	152129829	Subspecies	TGTCAGTGATGCTAGTTGGCCAAACCCACTGGAAG[A/G]CAGCCAGCAAGGGAGGCAGGGGACAGTGGTCTGCA	A // G	0.636
Affx-961026264	1	152142508	Subspecies	TGCTCAACATTCTGTCTAAGACACAGGCAGGAAAA[C/T]GCCAGATGCCAGCTGGATGGATCTGTCTTCCCACA	T // C	0.644
Affx-961026266	1	152173490	Subspecies	AAGAATCAAAATATGCACCCAGATTTCTTCGTTCT[C/T]GTGTTCTTTTTCTTGGTGGCTCAAGGATACAGAAC	T // C	0.652
Affx-961026273	1	152402081	Subspecies	CCAAAGAATATATGGATCTAATTAAAAATGAATTC[A/G]CATCTCTTTTCATATGCCTGTCTTCCCTTTCTCTC	A // G	0.61
Affx-961115990	1	152489776	Parentage	TACAGATACTATTTTAAAGTTCACTTACATTCCAC[A/G]TATGTAAAGTGAATGAGTTTGGATCTAAACAGGTA	A // G	0.734
Affx-961026278	1	152514355	Subspecies	AGAAACGTCTGCAAGAAAAACAACACATCAGACCA[C/T]ACGCCCCAGCGCACAAAGAACAGACAGGCAGTTCC	T // C	0.626
Affx-961026287	1	152825273	Subspecies	CCATCTGTTTTCCCCCAGGAGGTGAATCTTCAACA[A/G]GCTATTTCAGCAAAGGTATGGAAGAGAGAATCTTT	A // G	0.652
Affx-961026288	1	152829652	Subspecies	CTCCCCAAAGAGGTGGGCTTCCAGAGGCCCGAAAA[A/G]ATGGTGAGAACATGGAAAAGTCAAGACAAGGGTAA	A // G	0.626
Affx-961026302	1	153006059	Subspecies	CTAAATAAACCCTAATGGGAAAGAAACAAATAATA[C/T]AAATTAAAATTAAGGTCATTGGAGTATCTTTTGGG	T // C	0.714
Affx-961026303	1	153006541	Subspecies	GTGAGGAAGGGGGATGGCAGAAGAAGCTGATGAGA[C/T]GGTCTCTAAAGGGAAGCAACTCAGCTGAAGCAGAA	T // C	0.686
Affx-961026304	1	153006865	Subspecies	CCTTTGTGGGTCTGTTTTATTCTGCTGAATTTTGC[A/G]AAGCAGGCACAGCAATGACTTCATGTGACCCAGTG	A // G	0.63
Affx-961026307	1	153007580	Subspecies	CATCCGATTCCAGTTACCAGGCCCTGGCAAGGCGG[A/G]CAGGCTCGGTACGAGACATAACCTTTCTGTTTATT	A // G	0.658
Affx-961026308	1	153008053	Subspecies	AAGTATGTATTTACATGCATGCATTATGGTGTCCA[C/T]TTTATAGAGTAGAAAACTAAAACCTAGAGAAATTC	T // C	0.684
Affx-961026313	1	153013963	Subspecies	CCGGCCTTGCTCACCACTGGGTCCCCCATGCCTGG[C/T]ACTCAGAAGTGCTCAGTGAATCGTGATTTAATGAA	T // C	0.652
Affx-961026314	1	153014016	Subspecies	GAATCGTGATTTAATGAATGAAGTGAAGGGGATGC[C/T]TCTGATCCAAGTGAAGGCAAGCATTAGTTGGAGCT	T // C	0.72
Affx-961026315	1	153014325	Subspecies	TGTTGGCATTTGGGGTCAAAAGGCCGGGTCAGCTA[C/T]TGTGACCCCTGTCAGATGATTTCACATGGAGGGCC	T // C	0.602
Affx-961026316	1	153015168	Subspecies	ACCTGGTGAACATTTCTTTGCAGGTGCCTGAATTC[C/T]TGAAGACTTGCAAGAAGGCTAGAAAGACAAGAATC	T // C	0.664
Affx-961116095	1	153743312	Parentage	ATTTGTTCTCTGTACCATGATAGAGTTTTCTGCTT[C/T]TGACTATCACTGCGTGAAATTATTCTATTGTGTTT	T // C	0.792
Affx-961026336	1	153923076	Subspecies	TCTGTTTCAGGGAAAGGCAGTTGCCTTTATCACCA[C/T]ATGTCGCCCTTTAGGGGTGGAGGTCTGCCCTTGGG	T // C	0.694
Affx-961026337	1	153974490	Subspecies	TCCCTTAGAAGTAAGTGGGTTCTTGGCAAAATCTG[C/T]TGTTTACATGGTAGGAAAGAAAATGATCATCTGTT	T // C	0.708
Affx-961026338	1	153997502	Subspecies	CCTGAGAGGAAGATTAAGTTGTAAACCTTAAGAAA[A/G]GCATCACAAAACATTTTATAATTGATCAGTTTCCA	A // G	0.718
Affx-961026341	1	154115651	Subspecies	TTCAACAGAGTACATTTTTTAAATGAAGCGTGCTT[G/T]TGGACATCTAAGTTCGGGAGGCTATTGAATACACA	T // G	0.734
Affx-961026342	1	154116294	Subspecies	CAGCAGCAGCATTAGAATAGCAACACCCACCACCA[C/T]GAAAATGATCAACTATTGAAGAATTTTCTTCTGAT	T // C	0.642
Affx-961026343	1	154116417	Subspecies	AGATTTGACATTTATAGCACAGTCATAATCTGTAT[C/T]ACTTTGGACTTCCCTGGTGGTCCAGTGATTAAGAA	T // C	0.668
Affx-961026344	1	154116793	Subspecies	CCCTTTTGACAGTAGTATCTTCTCACTCAAAGCGT[C/G]TTTATGGGCCCCATCCTCCTGATCTAACACTGCCA	C // G	0.658
Affx-961026345	1	154138921	Subspecies	CCCGGAGAGGCGTTGCGCTGTGATTACTATTGTTT[C/T]GGCATAAATACATGTTGTTGTGTTTTAGCTCTGAC	T // C	0.734
Affx-961026347	1	154188367	Subspecies	TCCCCGCGCTTCAGGAGCTCTTCTCGTTTCCTCGG[G/T]GTTGGCATCCTCCACCTTTCCCTCTTATTACCGAA	T // G	0.644
Affx-961026348	1	154189033	Subspecies	AGCCCCAGTACTGGTTAAGACTTGTTTTTGTCCGA[A/G]GAGTTCTTAGATGTGACTCAACACCTTGAAACAGG	A // G	0.664
Affx-961026349	1	154192148	Subspecies	GGTCAAGAAGACGCGGTATGTGAACAAGCAGATAA[A/C]GGTTGCTATGCCGTTTCTGTAGACTTACTTGTCTA	A // C	0.75
Affx-961026351	1	154204009	Subspecies	GCTTTTCTCCTGGCCAGATGGGTGGATGGAAGGCC[A/C]GAGGAGCTAAGACAGATCTGAACTGATCCCTGCAG	A // C	0.66
Affx-961026352	1	154205856	Subspecies	TTGTCTGGGGGCAGAATTTAACTGTAATGTGGGCT[C/T]TTTTCCCTTTCTGTGAAGGGACTGGGGCAGGTGGG	T // C	0.6
Affx-961026353	1	154206892	Subspecies	GGGGATCAGTTTAACAGAGCTTGGGCCCCCCGTTA[C/T]TGGTGAAAGAGTAAAAAGCCAGTTCAGACTGGGAG	T // C	0.692
Affx-961026354	1	154217321	Subspecies	TGCCTGACCTCCAATCCACTCCTAGAACTTGCATC[A/G]GTGATCCGAGCCAATAAATTCTACCCTACAGTTTA	A // G	0.716
Affx-961116110	1	154410609	Parentage	CTTTATGTCTGCATTTGTTTTATGCATTAAACATT[C/T]GGTGATCCTATACTGGGTGAATATATATTGACAAG	T // C	0.728
Affx-961116146	1	154698593	Parentage	GCTAAGGCAAACCTAGACAAACAAAAAGCTATTAC[A/G]AAGCTTTAAAAAGGTTTGTGTATTAAAAAGCAGAG	A // G	0.728
Affx-961116149	1	154745756	Parentage	ATCAAATTATATACACTCACAATTAAATAAATTAT[A/G]TTCAAAAACAGTTTCAACAAAAGCTCAAAATCCTT	A // G	0.744
Affx-961026380	1	154826488	Subspecies	TCCTCAGTGCCTCAGACCCACCACAGTAATCATAT[A/C]TTAGAGACACAAGCATGACTTTCTTTGATGGTGGT	A // C	0.674
Affx-961026382	1	154830842	Subspecies	AGCACATGAGGCATCTTTGCCTTTTAGAAGTTTAC[C/T]ATTTAAATATAGACAGTAGCTGGTGATGCAACTGA	T // C	0.726
Affx-961026383	1	154831271	Subspecies	TGAAGATGTTTTCATTTCTTTGGCATCTTTTTTTG[C/G]CCCAGACTAGTGAGTACTAGTGAGTATTACAAGTA	C // G	0.676
Affx-961026384	1	154831704	Subspecies	TATCTACTTTCTCTGTATAGAAAGTGGATCTATTC[A/G]GATTCTCAGAGCTCCCCTGGGCCCAGTGTCCACAG	A // G	0.698
Affx-961026395	1	155148716	Subspecies	CACAAAAGGAGCAGGAGTCAATGACTGATCTAACC[A/G]AATACTGAACAAACCAGGAGATACTCTTCCCCACA	A // G	0.634
Affx-961026396	1	155149966	Subspecies	AGCACACTGTACCATTTCTGGCCCAATGCTGACCA[A/C]CTAAGATATTTACTAATAAACTCACTTGTTGACTG	A // C	0.724
Affx-961026397	1	155150005	Subspecies	AGATATTTACTAATAAACTCACTTGTTGACTGATT[C/G]GCTAATTCACCAATCAACTGGCAAACGGATGGGGA	C // G	0.728
Affx-961026410	1	155613885	Subspecies	GAAAACTATAAATTATGGTGCTATTAGGAAACAAA[C/T]CCTTCCAGCTTTATTATCTACCTGGCTCCTACAAG	T // C	0.74
Affx-961026412	1	155614568	Subspecies	GGTATTTCCTTAAAGCATTTTGGTCTTCTACTTGC[C/T]GCTGTGGTTAAGGCTCACATTAAACATATGGGGAG	T // C	0.698
Affx-961026413	1	155614877	Subspecies	GCGTCAGTGTTATTTTGGGAGGCCGCAGGAAGGCT[C/T]TTACCGACCAGGGAGCCTGCAGAGCCCATGTTTGA	T // C	0.62
Affx-961026414	1	155616416	Subspecies	ACAGGTATCTGAAGTTGCTTCAGAGGCAGGGAAGT[C/G]GGGATGTGTATGTATGGAAAGCTGCTTTCCTCCTC	C // G	0.646
Affx-961026418	1	155711489	Subspecies	AAAAGTGATTTCCTTTACCAGTAAAGTTGATGGCT[C/T]TGCCTCAGTGACGAGCTTTCCCCCTTCCCTTTGCT	T // C	0.686
Affx-961026422	1	155751909	Subspecies	GGGTTTTTTCCTTACACAGACAAGCCAGCGTCAAG[C/T]GTGCTCTGCTGAGTGCTGTTGGTATGGGTTCCTGT	T // C	0.688
Affx-961026423	1	155784509	Subspecies	AGAGCCTTAAGTTCTGGGGGGAGCCCTTAAACTGC[G/T]CACTGGGGCTTCCTGCTCTGCCTGTTAGGACCCCA	T // G	0.61
Affx-961026446	1	156524440	Subspecies	TGCCATTGCCTTCTATGTGGGTTCAGCTAAAGAAA[G/T]GTCCCTGGTGCCCTTAGAACAATCGAAGGGAAAAC	T // G	0.694
Affx-961026447	1	156524698	Subspecies	TGAAGAACCTTGAGGTAGGTGTATTGGTAGTGGGG[C/G]TATCTGAGGAAGCAAGAGGGGGGAACCCCTGCATA	C // G	0.608
Affx-961026448	1	156525909	Subspecies	CAGGTCACATGCATGGTCCCCAGGCCTTAACCAAC[C/T]CAGTTTGAGCATCTCCCTGTCTTCTGCACCCCCAT	T // C	0.604
Affx-961026461	1	156939885	Subspecies	TTAAAAAGTCTTAACCAGTTGGGCAGAATCCCAAA[C/T]ATATATTGTTTTCTATGCCAGAGCTGAGTAAGCCT	T // C	0.684
Affx-961026462	1	156942568	Subspecies	AGAAAAACAGTGTTTTGAGATGCGAACTTTAACAC[A/G]AAAGGACTTTATCTTAAATAAACTGAGGATAATGC	A // G	0.71
Affx-961026476	1	157478262	Subspecies	GTAGTTTTATGTTTCCACAAGTTTATCCATTTCTT[A/G]TAAGTTATCGAGTTTGTTGATATTTAGTTATTCCT	A // G	0.702
Affx-961026477	1	157482899	Subspecies	TTTGTTATTTATTTCATATAAATAAAAGAACAGCA[G/T]CATTATGTAGGCAAAGGTTTAGTGAGTTTCTGCTC	T // G	0.624
Affx-961026478	1	157483133	Subspecies	ACTGGGAAATTCCTCAGGCTGGGGACAGTCCCTTA[C/T]CTGCTTAAAGGCTTTGCTGCTTCAACAAGGAATAT	T // C	0.704
Affx-961026479	1	157483623	Subspecies	TTACAATGCTGTGTTCATTTTTGCCGTACAGCAAA[A/C]TAATTCATTTTCTGTTAGGAACTTGCATTTCTAAC	A // C	0.72
Affx-961026480	1	157487021	Subspecies	GAACATTGTGCCTATAAAGTGGAAAATTCTGTAAT[G/T]TAATCCTTAAATAGAATTGATATATAAAGGGAAAA	T // G	0.636
Affx-961026482	1	157498142	Subspecies	TAGCTGACAATAGCTTCAAATATAAAGCCAATTCA[C/T]GGTTAAGCATAACAGAAAGAGTGAAAAGGCTGGCT	T // C	0.698
Affx-961026483	1	157500856	Subspecies	ATGACTCCCCTCTTACCACATTCAATCAGTTGTCA[A/C]ATCTTATCAGTTCTGCTTTTAACACAGTTCTCAAG	A // C	0.754
Affx-961026486	1	157505404	Subspecies	AAAACTCTGCTGCACAGATGTTCCTGAGTGGTCAA[G/T]CCTGGTGCCTGGTCCCAAAGCTCAACCTTCCTCTT	T // G	0.634
Affx-961026490	1	157508726	Subspecies	CCAGCCCCTCATTAGATCAATCATGGCCATTGTCT[C/T]ACAGTTGAGTGGGAAGTCGTTACAGGTGGGAGAAA	T // C	0.668
Affx-961026491	1	157508809	Subspecies	TAATTCAGCAGAGGCCCCCTAACAGGAAATCTGCA[A/C]GGAATTACAATCAAATAGGAGGCTTATCAGGAGAA	A // C	0.69
Affx-961026492	1	157508846	Subspecies	GAATTACAATCAAATAGGAGGCTTATCAGGAGAAC[A/G]GGGTTGCTTCCAAGGCGGGATCTCTGAAGCCTTTC	A // G	0.686
Affx-961026493	1	157508952	Subspecies	CTACCACAAACCCACTTGGACAAAGAGAAGACAGC[A/G]TTTTCTTCATGTTGCAAGTCTGGTGGTGGGTTTTC	A // G	0.632
Affx-961026494	1	157509165	Subspecies	GCTGCACAGCTCTGCGGCTGACTCAAGTGTCACAT[C/T]ATGAGCTGCTGGTAGCCAATGCGGGGGGAAGTTCC	T // C	0.638
Affx-961026496	1	157510621	Subspecies	GGTGTCGCTCTGAAAATTTTGCTGTGATATTGGTT[C/G]TAATGAAATTTGGCTCTCTGTTACTGTTCAGCGAG	C // G	0.716
Affx-961026497	1	157510870	Subspecies	TAAGTTAATTCCATTTCTTTGTCCATCAAAATTTG[G/T]AAGATTTTATAACAATGGGATGCTTTTTAATTGGT	T // G	0.716
Affx-961026498	1	157512308	Subspecies	TTTTATTGCTGTGGCCAATCTACAAAGAAGCAAGC[A/G]TGATAGCTTTGCTATCAACATATGCATGTGTGATA	A // G	0.728
Affx-961026501	1	157515538	Subspecies	CCTTGTTTAGGTCTCCCTCAATTCCATGAGCTCTC[A/G]AGTTTTTCCTCTAATAGATCTCTCCCCAGCCTCCA	A // G	0.694
Affx-961026504	1	157518248	Subspecies	TGGACAACTTTTAGTCTTTACAGCCTCTATTATAC[A/C]CGACCCAACTTTTTTTTACCACTTCCTGAGAGAAA	A // C	0.748
Affx-961026506	1	157526343	Subspecies	TTTTGCCATTGGCAGTTCCATTTGAAATTGATTTT[A/G]CACTGTTGATTTTCCATTTTTATAAGGGACAAGAA	A // G	0.66
Affx-961026508	1	157554319	Subspecies	TCTGATTAACAATTGACAGAATAGCCTGGTCATTG[C/T]TGGGACTTGTAACACTTTAACGTGATAACTGGAAT	T // C	0.67
Affx-961026514	1	157662676	Subspecies	AGACTGTACAAAAATACACAGCTATAGCTGTGTTC[C/T]AATAAAAGTCTAAAAACAGAGCTGGCTGAATCCGG	T // C	0.7
Affx-961026521	1	157850252	Subspecies	CAATGGTGTATATTCCATTCCAAAACCAGGGAAAG[C/T]AAGTTCTCCCTCCCTCTGCCTTTCTGTCCTCTTCA	T // C	0.61
Affx-961026522	1	157852078	Subspecies	AGGGCAGGGCCAAATATCTGGACAGGACCATTCGA[A/G]TGCTCATCAAATTTTCCTCAGGATCTCCAGAGACA	A // G	0.642
Affx-961026523	1	157856754	Subspecies	CTCTAAAAGATAGCTATGATTATAGCTTATAAATA[A/T]ATGAAATGAAGGACAGCAGTGTTAGAAGGGATGAC	A // T	0.634
Affx-961026525	1	157859802	Subspecies	TTGTAGAAAATAACATAGGATAAAATCTACCTTGA[A/G]TTTAAAGATGCATTTTTAGAAACAAACCAAAATCA	A // G	0.714
Affx-961026529	1	157951467	Parentage	TAAGGGATTAGTCTCCAGAATTTACAAACAACTTA[C/T]GATGCTTAACAACATCAAAACAAACAACCCACTCA	T // C	0.64
Affx-961053899	2	497282	Subspecies	AAAAGGCAAGCCAATATCCTTAGAAAGAGGTAGGG[A/G]AAAAGATAAAGACAAAACAAGACAAAGGATTTCGG	A // G	0.668
Affx-961053902	2	520896	Subspecies	AATGCAACAGACTTGGGTGTATTTATTTTGTATAC[C/T]ACAACTTCACAAATTCATTGATGAGCTCTAGTATT	T // C	0.604
Affx-961053903	2	521769	Subspecies	TTTTTTATTTCTTCCACATTCAGTCTTGGAAAATT[A/G]TACCTAAGAATTTATCCATTTCTTTTACTTTATTC	A // G	0.672
Affx-961191213	2	767901	Parentage	AGCCTTCTCATACTCTTCTATCAATTTTGAACCAA[G/T]CCATTGTTCCATGTCCGGTTCTAACTTTTTCTTCT	T // G	0.76
Affx-961191275	2	1189917	Parentage	TAAAGGATCATATCATGATTAAGTAGTATTTATTC[C/T]AAGGATACAAGAGATTTCTCAGTATCTGCAGATCA	T // C	0.736
Affx-961191278	2	1193771	Parentage	AATTAGAATAAATATAGATATTTCCACAGAAAAGA[C/T]GTCAAATCTCCTCAAGCTAAATCTATAAACTCAAT	T // C	0.734
Affx-961191279	2	1200624	Parentage	ATGAAATTTAAGATGGAGTACTGGAAATCATGTAA[A/G]CTGAACAACAACAACAAAAAATTAAAACAAGGATA	A // G	0.8
Affx-961191372	2	1676093	Parentage	AGACTCAAAGCCAATGAACTTAAACTAGTTTTAAT[A/G]CTGAATATTTTCTCAGATCTCATGAACCTGAAAAG	A // G	0.732
Affx-961191448	2	2623366	Parentage	GGTATTGACCGTTTGGTAATGTCCATGTGCAGAGT[C/T]ATCTCTTGTGTTTTTTGGGAAATGGTGTTTGCTAT	T // C	0.736
Affx-961191514	2	2806502	Parentage	CCCAACTTCTCTTGTAATAACACCTCAAAAAACTA[C/T]AGTTAATTATAGCAACTAGGATATTGACATTAATA	T // C	0.746
Affx-961191586	2	3045409	Parentage	GGATTAGGAAGGTAAGCTAATTTCCCCATAAAGTG[A/G]AAGAATGAAGGTTGACTTTAATTTATTGGATTCCA	A // G	0.758
Affx-961191618	2	3087171	Parentage	AATACAAATTAACTATAGCAAAATAAAATAAAGTA[C/T]ACACTACAAATCATGTCATTAGTGAAGTTGCTCAG	T // C	0.752
Affx-961191671	2	3350429	Parentage	TTAATAGAATATAATAGAGTTTAGAAATAGAGACA[C/T]GAAATACAGTCAATTAGATTTTAATAAGGATTCAA	T // C	0.778
Affx-961053987	2	3622130	Subspecies	CTCTAGTGAAAACCAAGGAGAAAGAAATCATAAAC[C/T]TTCACACCAGCATTTCCTGATTGGCAGACTTACAT	T // C	0.642
Affx-961191739	2	4283755	Parentage	TCCATGCCCTAGAAGCTTAATACTCCTTCTCACAT[G/T]ATTATGCTTTAAAACCATTACTATTATAGAATATG	T // G	0.742
Affx-961054003	2	4410516	Subspecies	AATATCATATCATTTTCACCTGTCACAAAATATTC[C/T]TCTGTTTAATTTTCCCCCAACCGTTTAAAAATGTA	T // C	0.664
Affx-961054004	2	4420656	Subspecies	CATAGTGTGTGTATATACCATATCTTCTTGATGTA[C/G]TCATCCACTAGTGGACATGGCTTGTTTCCATATCT	C // G	0.708
Affx-961191763	2	4433331	Parentage	TTTATTGGGGGGTTTTTAATCACAATTTCAATTTC[A/G]TTGCTTTTGATTGGTTTGTCCTTTTCTTCCAGGTT	A // G	0.746
Affx-961054012	2	4488082	Subspecies	ATGAACTTTGTGCATGGGCTTCCACTCATCAAGGC[C/T]GACCTCGCTCTGCTCCTAGCATCAGGGATCAACAT	T // C	0.614
Affx-961054014	2	4519251	Subspecies	GCTTAGTATCAGGTAGACTGAGTCATCCCATTTTA[C/T]CTTTCTTTTTCAAAATTGCTATAGATATTCTAGTT	T // C	0.656
Affx-961054022	2	4754371	Parentage	TAAGCCCATGCTTGGGAACAAGAGAAGTCACTGCC[A/G]TAAGAAGCCCTTGCGCTGCAGTGAAGAGTAACCGT	A // G	0.6
Affx-961191937	2	5431759	Parentage	AGCAAACAGAATTCAGCACACATCATAAAGCTCAT[A/G]CACCATGATCAAGTTTGGTATAATCCAGGGATGCA	A // G	0.736
Affx-961054052	2	5848533	Subspecies	AATGGGAGAAAACTATAGTTACATTTAATTTGGCA[A/C]GTTTTATTAAACAGAATACAAAAAATACAAACTAT	A // C	0.754
Affx-961054055	2	5851040	Subspecies	GGTAGGAGTGACCTATACTGACAGGCACCCTATAC[C/T]TGGGTCCAAAGGACCCAAGATATTATACAGCAGAT	T // C	0.684
Affx-961054056	2	5851331	Subspecies	TATACTGTTTGATTGTATACCTAGAAAATTTGGGA[A/G]AATCAAACTGAAGAATTATTAGAATTAATAATAGG	A // G	0.682
Affx-961054058	2	5860317	Parentage	GAAAGTTGACTAAAATGCCAACAGTAGTTTTGTCT[A/G]GAAGTTAGTTTTTCCTTCTTTCTACTTTTTCATAT	A // G	0.688
Affx-961054060	2	5908918	Subspecies	TTTACAAGTTTCCTGAAACAGGAATTTGAATTACT[C/G]TGAGGCCAGTGCTTGGGAATGTAACCCTCTGACTA	C // G	0.648
Affx-961054063	2	5910206	Subspecies	TTGTGTGTAGTCAAATCTATGAGTCTTTGTGTTTA[A/T]GCCTAGAAAATCCTTTTACAACCAAAGATCAGATC	A // T	0.672
Affx-961054076	2	6326006	Subspecies	ATAAATACTACAGCTTACCATGTTAGTGTTGACTT[C/T]TTTGCTGAAAAATAAAAGATAATTCAGAAATCAAA	T // C	0.656
Affx-961054085	2	6481073	Subspecies	CCTCCTTTTCTTACCATCTTCAAACTGAAATATTA[C/T]GTTTTCTGAAAAATTTGCTTTCCGTCCTCTAGATA	T // C	0.688
Affx-961192204	2	7221352	Parentage	TAGATATTAGAAAAGAGGAGGTTAAATGATCAATT[G/T]ATAGAAAATATAATTGTGTACTTACACAACCTTAA	T // G	0.73
Affx-961192208	2	7247761	Parentage	TAATTTTTCTTTAAGAATATCAGAGAGGTTTAGAT[G/T]GTTCATTGGTCCCATTATTTTAGTACCCTTTTAAT	T // G	0.768
Affx-961054116	2	7720046	Subspecies	ATAATTTAATTTATTATTAATGAATTTATTATTTA[A/T]TATTAATGAAGTTATTGCTTCATTTAGTTTCCATT	A // T	0.72
Affx-961054122	2	8072331	Subspecies	CTGACCTTACCATATATTAATTTAGATATAAAATA[A/G]GATCTGTTTATGAACATCCAGGTGTGATAAAACAG	A // G	0.732
Affx-961054123	2	8072384	Subspecies	CCAGGTGTGATAAAACAGTAAAGAGAATGCAGTAA[C/G]ACTCCTTCCAACTCCCACCAAAAAAAAGGTGTTAT	C // G	0.756
Affx-961054124	2	8072440	Subspecies	AAAAAAAGGTGTTATACAGACTGAAATCCAACCAG[A/G]GTTCCTTTCCAGCCATGTCAGTGGAGCTCATCTAT	A // G	0.622
Affx-961054125	2	8073157	Subspecies	ATCTTGATCCAGGTCAGGTTTCCACTTCTAGTTCC[A/G]GTTCACATGCACCCGAGACTGTAGTGAGTGCCTTA	A // G	0.66
Affx-961054126	2	8073393	Subspecies	TTCAGAAGATATTTTGTCCACTTGAAGACTCACAT[A/G]CTTAAAATACAAGAAATAGAACAAACAAATCTTAC	A // G	0.66
Affx-961054127	2	8084094	Subspecies	TCTACTTAACTGCACATTCCAAAATAAGAAGGAAA[C/G]AATTATTGAAGGCAAGAAGGCTATGTCATAGATTT	C // G	0.696
Affx-961054137	2	8381362	Subspecies	GAAAGACAAGGACCAGATTACAAAATACTGGGAAA[A/G]TACAAAAGAGGAAGTGATAACCTCTGCAAGTCAAG	A // G	0.774
Affx-961054140	2	8629072	Subspecies	ACAGAATTCTCACAGATGAATTTGATGAATTCACA[A/G]CATCTTACACTAAAAAGCATATGAATAACAGTTCA	A // G	0.712
Affx-961192297	2	9509340	Parentage	ATACTAGGAAAAAAGACTAAGTCACACAAAGTAGG[A/G]AAAGATACAAAGTTCATAGTAATCTATTCATTCCC	A // G	0.738
Affx-961054158	2	9567320	Subspecies	TTAGTGGGGGATATATTGGCTTCAAAATCTTCAGC[A/G]GTGCTTTTTCTTCCTGGGGACTCTTCCCCAGGGTG	A // G	0.668
Affx-961192306	2	9641730	Parentage	AGCACCTTATACACATTAACTCCTGTTACATTAAC[C/T]TTAAAGAAGGCTGAGCACGATGAATTGATGCTTTT	T // C	0.788
Affx-961054163	2	9763424	Subspecies	TTGCCCAGAGACGTGACTTCCTCATATTGTGTATC[A/T]TGTGCTATAAAGAATTTGGTGAACAAGATAAGAGT	A // T	0.778
Affx-961054164	2	9769119	Subspecies	ACCCAAAATGCAATAGTAAATGACATTCACAAAAA[A/G]AATTCAAGCTAAGGCTGGATGATCATTTGATAGGG	A // G	0.604
Affx-961054165	2	9783170	Subspecies	GTCCAGGAAGCATAATGAGGATGAAGATTTGCCAA[A/G]CAAGCAAGCTGTATATGTTGGCTACCTAAGTCCCC	A // G	0.698
Affx-961054166	2	9860339	Subspecies	ATCAGTGATAGAAGTTAACCATCTTATGAATATAT[A/G]TTCTGGTATTTTCAGATGGAAAAAAAAGTGTTTCC	A // G	0.65
Affx-961054167	2	9863857	Subspecies	AACAGCTCTTTGTTCATCTCATCTATATCCATCCA[C/T]ATAGCAAAACTTCAGTTTCCCTACTTAAATGCCTA	T // C	0.71
Affx-961054169	2	9870989	Subspecies	GGAGTGCCTAACGGTGAACTCCTTTGGTGTATTAG[A/G]TTTATCGAGTTAATTTCAGGCTTTAGGAAAGTGCC	A // G	0.678
Affx-961054170	2	9871900	Subspecies	TTGCAAAGAGTTGGATACGACTGAGTGACTGAACT[A/G]AACTGAATCCAGAAACTAGTTGGCAGAGCATACAC	A // G	0.622
Affx-961054171	2	9872014	Subspecies	CTACTGTTAGCATTTTAAAGTGAAGCACAGAAAAG[A/G]AGAAACATATTCAGGATTCTGATAAAGGCCAAGCT	A // G	0.652
Affx-961054172	2	9880918	Subspecies	CCTGAAATAATGGTTTGAGATTCAATATAGATGAA[C/T]ATATTCATCAATATAGATGGCACTTGGAACTAGGG	T // C	0.714
Affx-961054173	2	9882397	Subspecies	TATTTGGCAAATGGTTTCTTGAAAAACAACTGGGT[A/G]AGACTATCACTTCAAGAAAAACCTTTGATATCATT	A // G	0.624
Affx-961054174	2	9884242	Subspecies	GACATAAATAGATTGTTTTTGGTGATTTCTTTCCA[C/T]AGCCATCCCAAGGACCTTTTGGTCTTCATAATAAG	T // C	0.71
Affx-961054176	2	9889804	Subspecies	AAAAATACAGATATCATACAGAAGGACTAAGTAAC[A/G]AAAAGATTAAAGTGTGTGTTTTTATCACTAACTTC	A // G	0.802
Affx-961054177	2	9889979	Subspecies	AAACTTGATCCTAATGAGAAACAATAATTATCTCT[C/T]GAGGATTCAATTGTCAACTAGCTTCAGAGGAAACT	T // C	0.704
Affx-961054183	2	9897327	Subspecies	TTCTCATATAATAGACAAAATATGCCACATATCTG[A/G]TAAGATATTAATATCCAAAATATATAAAGAACTTG	A // G	0.68
Affx-961054184	2	9898561	Subspecies	CTTGTATGTGGAATCTAAAAAACCAAAGTTGAATT[C/T]ATAGAAATAGGTGAATGATAGTTGGATCTGAAGTG	T // C	0.678
Affx-961054185	2	9902722	Subspecies	TAGAGTTTGGAAAATCCACTGGTTTTATTAACTAA[C/T]TGGAAACTATATATGATGGAGAGGAAAGAGTCTAA	T // C	0.698
Affx-961054186	2	9907579	Subspecies	AAAAGACATGTTAGTGTAATTTATGAAGTCTTAGT[A/G]TTTTAGAAGTATATAAAAAATATACATATTGTAAA	A // G	0.634
Affx-961054187	2	9909288	Subspecies	AGTTCCAACCCCTTTTCTTAAGTGTATACTCATAC[A/C]TCTATCAAACTACCTCTTAAATATAATTCCACCTA	A // C	0.704
Affx-961054188	2	9909577	Subspecies	ATTGTCTATATCAGGTAGTGTGATCAGGAAAATAA[A/G]CAATATTAGGTGGAATGTACTTGATAGAGAAAATT	A // G	0.774
Affx-961054189	2	9923461	Subspecies	GGATAAAGTTTAAAAGCAGTAAAATATATCTAAAC[A/G]TCAGAATTATGAAAACAGCAGGTAACAGAGCAGTT	A // G	0.666
Affx-961054190	2	9931584	Subspecies	AACAGAAAGCTCTAAGAGGGCAGGGATTGTTGTCT[A/G]TATTGTTTCCAGCTTTATTTTTAGCATCTAGAATA	A // G	0.676
Affx-961054192	2	9955560	Subspecies	CCTACCAAAGTGTAAATTCCATGAGACAGGGCCTT[C/T]GTTTAGTGTCTATGCACCTGTTACCCAGTGCAATG	T // C	0.702
Affx-961192319	2	10030645	Parentage	AAGTTGTTTTGTGGAATTAGCTTAGCATTCAAATG[G/T]TCTTTCAATGAATTTGTGGGGGAGAAAGTGGTCTC	T // G	0.764
Affx-961054194	2	10032911	Subspecies	CTGATAAGCCCTGAATGTCTGATTACTGGATGTTA[G/T]CTGAAGGAAGGGAAGAAATTCTTCCATAAGCAGGG	T // G	0.694
Affx-961054195	2	10049371	Subspecies	TGAATCTCTATTAAGATGTGGCTCATTATGATACT[C/T]AGAAAGTATCCTTGGGTCTGTTTGTAGTCAAGCCC	T // C	0.736
Affx-961054197	2	10096740	Subspecies	TGACAGTGATCTTGTATATTCTTCATTATGACTTG[C/T]TACATCCGTAATTACAAATATTAGTGGAGCACAAC	T // C	0.718
Affx-961054198	2	10099941	Subspecies	TTTAAGATCTATTCTCAGTAATTTTCAAGTATACA[A/G]AATAATATTATTAGCTATAATCATAATACTGTGCA	A // G	0.68
Affx-961054199	2	10141251	Parentage	TAGGGAAAAGAAGATAAAGCTAGATGAGTTGTACA[A/G]TAAGATCCATATGCATTCAAGGTGAGTGAGAGCTT	A // G	0.642
Affx-961054200	2	10171336	Subspecies	TGCTTGACTACATGTATTTCTCAGTCAAAAAATCT[A/G]TGTATATATTGACTTGTCCCCTACCTCTTCAGAGC	A // G	0.658
Affx-961054201	2	10192582	Subspecies	TCTAGAATTTGCTACTGCCTAAGTGGAGTGGGTGC[C/T]GTAGATTCAGTTAGTTGGCAGTGTACTGAGATAAT	T // C	0.626
Affx-961054202	2	10194486	Subspecies	GGTAAAAACCAGATACAAGTGAGGGTGACTGAGAA[G/T]GAGTGACTGAAGATTTGAGAGGAATGTGGCATCCT	T // G	0.68
Affx-961054208	2	10395148	Subspecies	AAATAGAAGCCTGAACATAATTTGAAATTTATGTG[A/T]AAGCAATATGACCTTTGTGACCAGGCCATACAGAG	A // T	0.646
Affx-961054209	2	10395277	Subspecies	TTAGCTTGCTCTCCAAAAACTTCTACCACTTCACA[C/G]ATGTAAGATTCTTAGACCACATGTTTCTGTTCTTT	C // G	0.772
Affx-961054210	2	10395494	Subspecies	TTTTCAATGTCTTGTGCTTTTCATTTCTTTGTAGA[A/C]ATCTTAGTTTCCATATGTAACCATTTTTATTCTTC	A // C	0.756
Affx-961054211	2	10401900	Subspecies	ATGATTTTGGCTTACTTCAGCAAAGTATTAGTTGA[C/T]AGAACTTCCTGTTTGCAATTTGAAATTATTACATC	T // C	0.708
Affx-961054212	2	10407436	Subspecies	TATGGCCTAAAATTTTTGTTTCAGGGACTCTTACA[C/T]ACTGATTTTTATTACCTCACATCCTCTAAAGTAGC	T // C	0.704
Affx-961054217	2	10561723	Subspecies	TAAGCATGGTTCATTTTTTGCTATTTAAAATTATA[A/G]CATAGTATTTATCCTGGTACAAATATCCTTTTATA	A // G	0.762
Affx-961192363	2	10882446	Parentage	AAATTAAAATATTTAACAATTATGTTGGATTTGTC[A/C]ATTTTTTCTGTCAGTGAGCTCCATTTGCTTTTATA	A // C	0.732
Affx-961054219	2	10882492	Subspecies	TCAGTGAGCTCCATTTGCTTTTATATTTTGATACT[G/T]TGTTATGAAATGCATGCTTAGAACACATATCTTAC	T // G	0.772
Affx-961054220	2	10895628	Subspecies	TACAAGCAGAATAACAATTGAGCATGTATAAGTAT[C/T]GTATTCCTTCACATGGACTTCACACTACTTCTATT	T // C	0.75
Affx-961054222	2	10901366	Subspecies	CCCTTACTCTACTAATCATAGTTATTTAAATTCCT[A/C]GTTTTATAATTACAATAGCTCTGCATTGAGTTTTT	A // C	0.72
Affx-961054229	2	11280399	Subspecies	TATCAAAATCCTATGAAAGCTTTTTCCAAATCTTA[C/T]ATATTATGACATGATCCTTAAATGATGAATTTTTC	T // C	0.732
Affx-961192379	2	11298608	Parentage	TGAAGATCAGTTTTTAAGTGTATGGGGTTTCTCTT[A/G]TATGTTACTGGTTGCATCCTCCTTGTTGCTTTTAA	A // G	0.74
Affx-961054231	2	11322504	Subspecies	TGCATTTACTTAATTCTGACCTTAATTGTGAACAC[A/T]GTTTCATAGTCATTTTGTAGTCATTGTTCTTGATG	A // T	0.662
Affx-961192393	2	11501855	Parentage	CCCTGTGCATCTGTGATTTAGGTTCTAAATATGGT[A/G]TTATTAGCCCTTTCCTCGTATGCACAACAGCAGAG	A // G	0.752
Affx-961054240	2	11580385	Subspecies	TCTCTTACTCTCTTTGAAAACTTCCCCTATAAAGT[C/T]AACTCTTAAATAGCCTTAGGTTATCTAACTGCTAG	T // C	0.69
Affx-961054241	2	11583239	Subspecies	TTACTCAAGTACAGAGGTTAGCTTCAACAAGTACA[A/C]CTAGAAGGGTCAAGGTACAGTGTCCAGGTAGCAAG	A // C	0.724
Affx-961054242	2	11584782	Subspecies	AATAACCTAAATAAGCCTTAAACATTTACCATTTT[A/C]TTTGTAAGAGAAAGTAAACAGCTTATTAGAAAGCA	A // C	0.644
Affx-961054243	2	11585081	Subspecies	TGAATGTCTGAGTAGTAGTTATGTTCTCATTTATT[G/T]ATACCTATATCTAGTTCTGTGTCTGACAAGATATG	T // G	0.664
Affx-961192405	2	11756262	Parentage	ATTAACTACATTAGCTACTAAGATTCAAAACTTCT[A/G]AATGGCTATCTTATAACAAAAAGTTGATTTGATAT	A // G	0.75
Affx-961054250	2	11805313	Subspecies	GTAAAACAAATCCTGCCCTCTAGATCCTGTACTAT[A/G]CTAGATGATGTCTTTACAGTAATATGTTCTTAAAT	A // G	0.672
Affx-961054254	2	11835991	Subspecies	ATGTCTGTATTTAATGTGATTGCTACCCACTACAC[C/T]GGAGAAGGCGATGGCACCCCACTCCAGTACTCTTG	T // C	0.706
Affx-961054259	2	12028714	Subspecies	ATGCTGAGAAAGAAATTGAAGATGAAATCTCTGAA[G/T]AGCTGTCAGTTTCCTTGGAAATATTAAGAAGATAA	T // G	0.654
Affx-961054260	2	12034214	Subspecies	AATTAAAAGAGGTTTCAGCTTTATATTGCTGGAAG[A/C]ATTGCCACCAAACAACAGAGTTAACCTATCCTTTG	A // C	0.676
Affx-961054261	2	12035089	Subspecies	TTGCAATTTGAATATTTGTATGTAGGGGACTTACT[A/G]TGTATACCCAAGAGTAGGAATTCAAGGTCAAGTGG	A // G	0.66
Affx-961054262	2	12036214	Subspecies	ACTTCCCATATTTTACATAAGGCTGTGATACTTGT[A/T]TACCTCCCCTATACATGCATTCTCTTTCTCTCTCT	A // T	0.644
Affx-961054263	2	12040718	Subspecies	CTGTGAGCATGAATACAAGCACCAGGATATCCTCA[A/G]TAGGGTTGTTTTTCAATAGCAAACCTATGGAGAAA	A // G	0.714
Affx-961054264	2	12041200	Subspecies	AATCCTTCACAAGGACATTTATAAGCAGCTTTATG[A/C]ATATTTCCCAGAACTTGGAAGTGACCAAGATGTCC	A // C	0.66
Affx-961054265	2	12041545	Subspecies	TGGATATAGATCACTATATATTGTCCAAGCTCATA[C/T]GATGTACAACATTGAGAGAGAAACTTTGCTGATAC	T // C	0.658
Affx-961054266	2	12041591	Subspecies	ATTGAGAGAGAAACTTTGCTGATACTGTTCAGTCA[C/T]TAAGTCATGTCTGACTCTTTGTGACCCAATGAGCA	T // C	0.738
Affx-961054269	2	12042707	Subspecies	GGGAAATGTATTTAACTAGCTTTCCCTCAGTTTCT[C/T]CATCTTTTTAAATGGAATTATAATAGTATCTTCTT	T // C	0.706
Affx-961054270	2	12042849	Subspecies	AACTTAGTAGAGAAGATAATAGAAGTTAACTAAGT[G/T]AAATAAAAATGCACACTGAGTTGGATGAATAAATA	T // G	0.744
Affx-961054271	2	12043126	Subspecies	TTTGAAACAAAACAAAGGCAGAACTAATTAGAGTA[C/G]TATCAAGCAGTACACTGTTTGTCTTTTAAAACTTT	C // G	0.656
Affx-961054272	2	12043182	Subspecies	GTCTTTTAAAACTTTGTGATGATTGTGTTAAATAC[A/G]TTTAAATTATTTCTATGAAACTCAAGGAAAATTAA	A // G	0.656
Affx-961054273	2	12043520	Subspecies	GTGTATGCACTGAGCAGGAAAATTGGGTTTTAGAG[A/G]TAATCCCATCTGAAAAAATAATAAAATCAATTCCT	A // G	0.676
Affx-961054274	2	12043641	Subspecies	ACATGCAATGAGCATAAGTAGTATTTGGGATATTG[A/G]CTTTCAGAATTCATTTATTATAAATACACACTAAT	A // G	0.696
Affx-961054275	2	12044448	Subspecies	AGCAAAACACGTTTAATAATACAGACTAGGAACTG[C/T]GGAACCTTGGACACAGAAAATCAGAAGCCTATTTC	T // C	0.774
Affx-961054276	2	12044783	Subspecies	CTTAATTAAAACTATAGACTTCAGATTAATTACCA[C/T]CATACAAAAAAGCCTTCAATTACCTGGTCTTAGTC	T // C	0.764
Affx-961054277	2	12045653	Subspecies	TTCCTTCTGGAACGTGGGCTTTAGACACACACATT[C/G]TTTTCCAGATTTTAGTCAGCAGATTAATTTAGCTG	C // G	0.682
Affx-961054278	2	12045702	Subspecies	AGTCAGCAGATTAATTTAGCTGAAGCTTCCCAGAG[A/G]ACTCTGGCATGCAAGTTTGTCCCTGGAGAGAATTT	A // G	0.754
Affx-961054285	2	12052874	Subspecies	TGTCTCTACTCATTTTTCTATTCTTTCTGTGTAAT[A/G]TGAAGAGTGGTTATCTTGCCATAGCAATTTTGCAG	A // G	0.682
Affx-961054286	2	12054171	Subspecies	AATTGAAATTTAGTTTTGATTTTATGTAAAAATAT[C/T]TATAGAATTATGGTTGAACATTTTAATAAGAAATG	T // C	0.684
Affx-961054287	2	12054460	Subspecies	CAAAGGTTAGCAAGTAGACCATCACTTTATATTTA[A/C]AAAACTAAAATGGTTTATAGATGTGGCCTCTGTTG	A // C	0.662
Affx-961054288	2	12054861	Subspecies	TCACTCATACACAGAACATTTCAAAGAAATGAACA[C/T]GTTAAATACTTAGGAAGGCAATAGGTTCAAAAGAG	T // C	0.712
Affx-961054289	2	12056172	Subspecies	TCATTTTGTTGAAAGGGTAAAGGAAACCACTCTGG[G/T]GGTTAGAGGATTGAGAATAAAATACTAAGGACTAA	T // G	0.696
Affx-961054291	2	12059683	Subspecies	TTGATTTTTCAGTATCCTAGTAGAAAAGCCATGGA[C/G]CTGTGCTGAAACTACTGATAACTGATTCTAAAAGC	C // G	0.76
Affx-961192413	2	12130913	Parentage	ATCTTACATGCAAAGAGAAATCCCTGAGACTATAG[A/G]TTAAATAAGAAACTCATTCCATAATTTACACACAC	A // G	0.738
Affx-961054297	2	12572056	Subspecies	CTGGACTCCTTTTCAACCAAGATACAATATTAGCT[A/G]TATAGTCATTTTCTGTCAGACACACATATTCAATT	A // G	0.75
Affx-961054298	2	12579481	Subspecies	AAGCTCAGGGCTGTGTTCCTGTGTTGCTGGAGAAT[C/T]TGTGTGATATGTCTTGCTTTGGAACTTGGCCCTTG	T // C	0.606
Affx-961054299	2	12589689	Subspecies	CAGCTTCAAAATCAGTCCTACCAATGAACTTATTC[A/G]TAATTGCCAAAACTCTTATGGAACCAAGATATTCT	A // G	0.674
Affx-961054300	2	12590071	Subspecies	ATCATTATATATTTGTCCAAACACAAAGACAACGC[C/G]AAGAGTGAATTCTCAGGTACACTATGGATTTTAGG	C // G	0.654
Affx-961054301	2	12598500	Subspecies	ACTGAACTGAACTGAGAGCACTGAAATAGAAACTT[G/T]AAAGAATAGAAATGATCAACAAATATGTGTTTGCT	T // G	0.674
Affx-961054304	2	12641929	Subspecies	TAAGTGTTTTATATGTTTAAATGGCTTCATTTTAG[A/G]TATGTTAAATATTCTGATGCTATGACAAGGACATA	A // G	0.668
Affx-961054306	2	12660135	Subspecies	TAGACATACTAAGGCCACTTCTCCATCTTTCATCT[A/G]GGATGGTCTTCACAATGTAACTGCCCCCTCTACTT	A // G	0.626
Affx-961054307	2	12660346	Subspecies	AAACAAGTAACAGGAAACTACAGCCAAACTAGAGA[C/T]CAAATTGCCAACATTTGTTGGATTGGAGAGAAAGC	T // C	0.706
Affx-961054308	2	12662277	Subspecies	TCTAGGGTTCATGTTGTCATCACTTCCACTCCCCT[A/G]CCTCTCATTTGAAACTTTCTTTTCCCACTTCCTCT	A // G	0.618
Affx-961054309	2	12664003	Subspecies	AATGAAGCAATCTGTACAACATTTAACACATTCTA[C/G]TTCATAAGAATGTGTTAAGTTCTCAAAAAACTGTA	C // G	0.744
Affx-961054311	2	12665254	Subspecies	TTCTGTAGATTCACTGTTATTCTTAACAATTCATA[C/T]TACTTATATAAATCATTATATAAATTGGCTAATTT	T // C	0.734
Affx-961054312	2	12667244	Subspecies	CATGAAATTATGAAACAAACATATAATATCAATTT[A/G]CAAAATTCAGAGGATGATCACAATATCAGAGTGGA	A // G	0.614
Affx-961192432	2	12841508	Parentage	TTTTGTTCACAATTATGTTTAAATAAATATATTTC[G/T]CAATTTTAATCCCTTACATGAGAAACATAAATAGA	T // G	0.732
Affx-961192503	2	13304858	Parentage	CCTCAGTATCCATAAATTCATCCTAAATAAAAGTG[C/T]TATACATAAATATACAAGGAAATAAGCAAGAAGAA	T // C	0.746
Affx-961054326	2	13429123	Subspecies	GCATATTTTTATTTCATAAATTTGTTTTTAAGGTC[A/G]GAGTCTTGTATAGATCATGTAATTTACTTCTGTGT	A // G	0.706
Affx-961054327	2	13429322	Subspecies	CTGACAGGGCTCAGGACATGCTACCCCCAAATATG[A/G]CACCTTGACATACTGGATATTTTAAGCTGAAGTTA	A // G	0.668
Affx-961054328	2	13440529	Subspecies	ATTTTTAAATATTTTGAACTACATGAAAATTAAAA[C/T]CCAACATTTTTAAATGCATAGAGTACCATTAAAAC	T // C	0.606
Affx-961054329	2	13443329	Subspecies	TTTCTGACTTGGGAGGAGGAGGGGATCCTCTGAGC[A/G]GTCTCAGGGCTGATTAAATTGGGTCCACCTGAGTA	A // G	0.62
Affx-961054339	2	14181110	Subspecies	TTAAACAGTAATAAGGTGGGACACCTGACCACTCT[A/G]CCGATTTACAATAGTTTTCTAGACAGTTTTCTACT	A // G	0.632
Affx-961192542	2	15025716	Parentage	CCATCAAGTCATGAGATATAAGTTTATAAACAACA[A/G]CAACAACAGCATAGTGAGATTCAGGTGGATCTTTC	A // G	0.742
Affx-961192572	2	15988473	Parentage	ATTTTACTTTTACATTTAAATGACAGTCTAGGAAG[A/C]TATCACATTCTAAAATCAGAGTTCTTTTTCTTCCG	A // C	0.758
Affx-961192576	2	16205831	Parentage	ACTGGCCAACTCCTTTAAAGTTTACTATATCTGCA[C/T]GTGCTTCTCCTGTTTATGTTTCAGGTTTTGTTCTT	T // C	0.742
Affx-961054372	2	16564108	Parentage	ATTTATATAAAACATTCTATCCAAGTGCAGAATAT[A/G]CATTCTTCTCAAGTGCACTTGAAATACTTTCAATG	A // G	0.754
Affx-961192598	2	16565312	Parentage	CACAGTCCTAGCCAGAAGACTTAGCAAAGAGAAAG[A/G]TAATAAAAGACACCCAAATTGAAAACAAAGTCAAA	A // G	0.74
Affx-961054374	2	16627525	Subspecies	CGATTTTCTCTCTTGCAATATCAAAAAATATTGTT[A/C]ATTTAGCATTAACCACATTTTGAAAACTTTTTTTC	A // C	0.774
Affx-961054376	2	16655684	Subspecies	CACACACAAATAGTATACATAACAGAAAAACATCA[C/T]TGTGTAAATGTAACATAACATGTGACTATAACTCC	T // C	0.738
Affx-961054377	2	16655833	Subspecies	GAAATATTTTGTATTTGGAGGCAGTTGAATTGAGT[A/G]AATAACTGACTTTAGAACTGGATTCTTTAAAAGAA	A // G	0.706
Affx-961054382	2	16825964	Subspecies	GTTCAACATATAGAATTTTTCTTTAAAACTAACTC[A/G]TTTGGAAATCAATACTGTAAATCCAGAAGTAGCTG	A // G	0.72
Affx-961054383	2	16836463	Subspecies	GGTGTATTCCCCTGAGGAATGGGGACCCTTTAGGC[A/G]ATTATTTGATAAGGCTTAAGTTGCAAATTCTATCT	A // G	0.684
Affx-961054406	2	17701263	Parentage	AGATGACTGAGTTCCTGAGTGATGAAGTGTGTTTT[G/T]TAAGGTAAGAGACAAATGTGATCTGCTTTGTGGTA	T // G	0.652
Affx-961054408	2	17718339	Subspecies	AGGGAAAGCTTCTCTTGTTTAAGAGATTAAATCTG[G/T]TAACTTTTGTTTTAGATGTAGGATTGCAAGGTTTG	T // G	0.742
Affx-961054411	2	17839603	Subspecies	AATTTCCATGATACATTAATCCTATGAACGTTTTA[A/G]AAGAACTCTGCAAGTGTATATAAGGAGAGAGAGAT	A // G	0.726
Affx-961054419	2	18158859	Subspecies	TTTAGGACTCCAGTCTTAAAGAAAGGAGCTGGGGA[A/G]GAAGAGGAAATTGATATCATGGAACTTCTCAAAAA	A // G	0.7
Affx-961054420	2	18159612	Subspecies	GAAATAAGCATTGATGGTGATCGACATACACTCAG[A/G]GTCAAAAACTGTCAACTTAAAGATCAGGGCAATTA	A // G	0.714
Affx-961054421	2	18168161	Subspecies	TACATCATTTGCAAACTGATACAATTTATTAGAAT[G/T]TACGTATTCAACCACTCCTTTTTATTACTGTTTTT	T // G	0.732
Affx-961054422	2	18168210	Subspecies	ACTCCTTTTTATTACTGTTTTTGTTAAAGAATCAC[C/G]TGAGAGGAAAATTCCAGCAAAAGTACCTGAAAAGA	C // G	0.686
Affx-961054424	2	18211861	Subspecies	AAAATCAGAGTTTTCCATAGGAAAGCTTGTTTCTT[A/G]CCTCTCTGCAACACTCCTGGCCTGTAGGGAGAGTC	A // G	0.718
Affx-961054426	2	18229471	Subspecies	TGGCACAAGCCAGTTATGGGACCTAATTGCAGCCC[A/G]TATCAAGCCAGTGTATTTTTTTTGACAATTCATTT	A // G	0.676
Affx-961192762	2	18357817	Parentage	AATAAGGATGTCCATTCTTATGACTTTTATTCAAC[A/G]TAATTTTGGAATGCCTAGACATAGCAATCAAAGAA	A // G	0.772
Affx-961054431	2	18414336	Subspecies	CTGAACTTTCTAGGAGGAAAATAGGATTTGACACA[A/G]TATTTCCCTATTATGTGGAATATTATTTTTTAAAT	A // G	0.74
Affx-961054435	2	18576887	Subspecies	GGGTGGCTCCCCAGAAAATTAAAAACAGAATTACC[A/G]TATGATTCAATAATTCCAATTCAGGGTATCTGCCC	A // G	0.678
Affx-961054436	2	18578984	Subspecies	GTAAGGTCACACAGAGTTGGACACAACTGAAGCAA[C/G]TTAGTATACAAGCACATAATAATAAATATAATCAA	C // G	0.606
Affx-961054437	2	18579889	Subspecies	TTGCCTATAATTAAATTTTCCTTGCGCTGGGCATT[C/T]AGCATGAATGTTGGTTTCAATTACTGCTCATTCAT	T // C	0.688
Affx-961054440	2	18647762	Subspecies	TGCCCTATGCCTCTTGGATTAGAGGTTTCCCAGCT[C/T]ATCTCTTTGAAGTGAAGATACTCGTGAGAAAGCAC	T // C	0.734
Affx-961054441	2	18653377	Subspecies	ACTTCTGTTTACCAAGGGCCTGAAATACTGTCCCT[G/T]TTCAACACTGACTGAAGGTATGCCTCGGACAGCAC	T // G	0.67
Affx-961054442	2	18654190	Subspecies	TCTTGATTTCTGTCACTGACTTCTATGCATGCTTC[C/T]TCTTCCAGCCTCTCTTTCTGTCCCTGCTCTCTCAA	T // C	0.64
Affx-961054444	2	18655053	Subspecies	TATCCCTAATATGTGAAGTGCTCTCAAAATAATAA[A/G]CCAAAAACAGGAATACTCCTATAGAAAATGGATAA	A // G	0.732
Affx-961054445	2	18655240	Subspecies	ATTACTAATGAAGCAGAATAAACTTTTAGGAAAGT[A/C]ATCTAGTAACAAGTCTCCTAAGCCTTCAATGTAGG	A // C	0.73
Affx-961054446	2	18655339	Subspecies	TTAAGAGTTTATCTTCAGTATATAATCAAGCAAGC[A/G]CCCAATCATGTATACAAAGATGTTCATCATGGGAT	A // G	0.666
Affx-961054447	2	18656574	Subspecies	ATCAGCTATTGTCATTGTGGGACTGTTTAGAAGTT[C/T]ATTACCTGGTGAAAATTTCATAACACAAACACACA	T // C	0.686
Affx-961054452	2	18744727	Subspecies	GGGGTAAGGGTGAAGGGTGAAGGAAAGATCACACA[C/T]ACACACAACACACATTTTAGTTCATAGGTTTCCAG	T // C	0.676
Affx-961054458	2	18902546	Subspecies	ATATTGTCATGTTCTATGACAATCTCAGTCTTGCT[G/T]AAATTATGTCAAAACACTCTGGGGAGATTCTAGGT	T // G	0.644
Affx-961054459	2	18903671	Subspecies	TATTGCTGGATTCAGTTGACACTTGATAAATGAGA[C/T]TGAGTTCTAACTTTTTCTCTACTATTTTTATTAAG	T // C	0.736
Affx-961054460	2	18915067	Subspecies	TGAGAAGTACAAGCTATCATGTGTAAAATAAGCTA[C/T]AAGGATATATTATCCACACAGAACACAGCCAGTGT	T // C	0.632
Affx-961054462	2	18944311	Subspecies	CTTTTTGATTATTATTATTTCAAAGGACAGTGCTC[G/T]TCAGCCTTGGCTGAATATTAGATTCATCCCATGCC	T // G	0.606
Affx-961054463	2	18945428	Subspecies	AATGATAAATCAGCTTCAACATCATTTAGCGGGGT[A/G]GGAAATGGGGAATGGAATTATAGAATAATTCAAAT	A // G	0.604
Affx-961054464	2	18945691	Subspecies	GTATATAAACAAAGTGATTTTATGTTTGAAATGAA[A/G]AATGTATATAAATTATATTTATGCTTTTAATCTTT	A // G	0.72
Affx-961054465	2	18945748	Subspecies	TGCTTTTAATCTTTACATAAGATTGCTTAATTTTA[A/G]GAACCTCAACAGGAGGCTTTGTGGTAATATTACTC	A // G	0.638
Affx-961054466	2	18948606	Subspecies	ATAATACTATTATCACTCTGAAAAATTAAAAATAC[C/T]TACTTGCCTCATAACATTTGTTACTAGTTCATTAA	T // C	0.75
Affx-961054467	2	18948885	Subspecies	TCCTACAGTTTCTCACAATATGGATTTGACTGATT[A/G]CGTCCCTGTGGGAAACACCTTCCTCTGTTTATTTC	A // G	0.646
Affx-961054468	2	18949614	Subspecies	GTAGGTTTCAGAGCCTCATTCTGAGCCCCAGGAGG[A/G]TGAATTATGGTTGATCTAAGCCATATGGTGGTCCT	A // G	0.714
Affx-961054469	2	18959406	Subspecies	AATGACAGTGTGTGTTTGAAAATAAAACCCACAGG[A/G]GGGAAGCTGAGATAAGAGGTGAGTTGGGGCACCAT	A // G	0.612
Affx-961054474	2	19124252	Subspecies	GCTGAAGTGGTTTCTCAAGAGACTTTGTCTAAATC[A/G]CGTTATTAAAAAATAATAAATTATGTCCTCAAAGC	A // G	0.698
Affx-961054476	2	19154493	Subspecies	AAAGCCACCTTTTTTTGCAGAGAATATGGGGATGA[C/T]TGACTAAACAAAGAGATCTGCTGGATAAGACCCCA	T // C	0.656
Affx-961054477	2	19160973	Subspecies	CCAGAGGTTTGCTTTGAAATAGTCTAGCAAACAAA[C/T]GAAACAGAACATGTGAGGGGATAAATGAATCAAGG	T // C	0.654
Affx-961054478	2	19163641	Subspecies	GACTTGTAAGGATTAGATGGGTTAAGGTATTTGAG[G/T]GTTTAGAACAGTGCCTGGCACATACTAAATGCTAT	T // G	0.626
Affx-961054479	2	19166804	Subspecies	AAGAAAATGAGCCTTCACATTGAAAAGGTTTACCA[A/C]GCAATGATGAGGAAAAGTCCCAAACAAAAGAAGAT	A // C	0.7
Affx-961054482	2	19173783	Subspecies	ACCTGGACACTGAGGCTGCATTTGGGGAAACCGGT[A/G]ATGAACAAATCCCGAGTGGATAAGAGAAGCAAGAC	A // G	0.716
Affx-961054483	2	19175606	Subspecies	CCCAGAAGTGAAATACAGGGGCACATTAATCTGCC[A/G]TGACAGCCTAATCCCATTCCTCCCCACCTCCCAAC	A // G	0.67
Affx-961192890	2	19254061	Parentage	ATTAATAAAGCTGGAACCACCAGTGAAAGGAGAAT[G/T]CATGAGGTTAAATGTCTTACCATCTGAGCATAAAT	T // G	0.75
Affx-961192937	2	19729370	Parentage	CACAATGTTGTGTACATCACTGCTCTATTTCCAAA[A/G]AGTTTGTATTACTGCAGGCAGAACTCTATACCTAC	A // G	0.736
Affx-961054502	2	19900340	Subspecies	CTGCCTTCCAGTCATAGGGAACTACTTGAATTCTC[C/T]AACAGATTCACCATGTCATATTCTTCAAATCCAGG	T // C	0.698
Affx-961054503	2	19909297	Subspecies	CTGGTTCCAGCCAGGTGTTTGTGTCTCTGTGACAC[A/G]TCGTCTTTCTCTGCACAGGAGAGCACTCCTTGAGC	A // G	0.612
Affx-961054504	2	19909575	Subspecies	GCACCCACAGTGTTTGAAAGAGTCCCGGACCTTAT[A/G]CAGGTTATAGGAGAAATGTGCCTACCATCTTCCTT	A // G	0.678
Affx-961054505	2	19914166	Subspecies	CTTGTTCAGGACTCAACATTTGTTGAGATGAGTGT[A/T]TGTTTTTTTTAATTGATAGACATTTTTTAGGGCAA	A // T	0.62
Affx-961054511	2	20073464	Subspecies	AGGGTAGTAATGCTAAAGAGGACCTTTTAGGTAAC[C/G]TCTTCAATTTAGTTGAGAAAATGGACACCCATATT	C // G	0.754
Affx-961054514	2	20078072	Subspecies	CCCTGCCATGTCCTGGTGTAGTAAATGGTAGAGTA[C/G]AATTTTGGGTCTGGAAAGAAGATGTGGTAGAAGCT	C // G	0.728
Affx-961054516	2	20125993	Subspecies	GGATTCAGGGTGACGGCTCACCACACCTTCTTCCA[C/T]CAGAAGTGGGCTCGCCTCTTCCAGGCTCCATATAT	T // C	0.62
Affx-961054518	2	20143242	Subspecies	CCCATTTCCTACTGTGGCTGGGGCAAATTAGAGAC[A/G]GATTCACAGCATAGCTGAAGAAGCTGAAAATTCAA	A // G	0.638
Affx-961054520	2	20201666	Subspecies	CAGGGAACAGTCTGGATAATACACTTTTGGCTATA[C/T]CTAATGGAACCTGACAATCTAGCCTAAGGAAAAAC	T // C	0.724
Affx-961054521	2	20209466	Subspecies	GTCCAGGGTGAACATGTGTAGAGTTTTGCCCCCTA[C/G]AACAGTTCTGATTTACTACTGTTGTTCTGCTTGTA	C // G	0.608
Affx-961054522	2	20209793	Subspecies	TTTTGGGGAAAACTCTCCAACAGATGGACACTCAT[A/G]CAAGCCAGGTGAGAGCCTCTGCTTAGGGTCCAGGG	A // G	0.646
Affx-961054531	2	20526307	Subspecies	AAATAACTTTTATACCAAAGCACATGTGTCTCTGG[A/G]GAACCAGGCACCTGGAATTCAGCTCCTGATGTGTT	A // G	0.624
Affx-961193002	2	20532995	Parentage	AAAATAACTTTGATTTCAGCACTCTTTTCCAGCAT[A/C]ACTCATTCTCTTTCAAGTTCTCCTTAATTCACAAA	A // C	0.766
Affx-961054534	2	20653260	Subspecies	AATAGATTTGGAAATCATATGGCTGGTATTCCTAA[C/G]CTAGTGAATCATGCACATTATAAAACACACTAAAA	C // G	0.686
Affx-961054535	2	20684766	Subspecies	CTAAGGAATTCATATGTTACTAAAAGTTTAATCAC[A/G]TAATTGTTTAAAATAAAGTATTAATGCATGACACT	A // G	0.752
Affx-961054538	2	20759736	Subspecies	CTTCAAATTAACATCTGTACACCCACAGCCCGGAA[C/G]TCAGAAGCCACCAAGGTATTTCCTCTCCCAAGTGA	C // G	0.618
Affx-961054540	2	20785998	Subspecies	CCTTTGATGGCCAGGACCCTGGGAGTCTGTCCCTC[C/T]CTGGCTGAGACCTGTCCCAACTAAGGTTAAGGGAG	T // C	0.628
Affx-961054543	2	20955263	Parentage	AGGTGAACTGATTTCATAGGAATTATTAAGACTGC[A/G]TGCTCCATAGTGAGGGAAGGTTTGGGTTACAGTTA	A // G	0.718
Affx-961054549	2	21181124	Subspecies	GCCAACAAAACTGCTTGGTAACAGGTAGTGGTTCA[A/G]TTCAGTTCAGTCACTCAGTCGTGTCCGACTCTTTG	A // G	0.726
Affx-961054551	2	21256422	Subspecies	GAGGCAGGCCAGACCAGGCCAGGCGGAAAGAGAGG[A/T]GAGCACATAATGGCAAGGATTTAGACTTGAGCCCC	A // T	0.644
Affx-961054554	2	21303074	Subspecies	GTTCTAAGAGCTTTGCCCATATTGACATGCAACAA[C/T]CCCATGAAATAAGCATTAAAATTATTTCCATTTTG	T // C	0.606
Affx-961054555	2	21304994	Subspecies	ACTGTTTGTTCAGGAGGTGGTTTCCAAGGTTTTAC[A/T]ACTTTGCTAAAAACATTCGGTCTCTTCTTTAGATC	A // T	0.826
Affx-961054559	2	21357723	Subspecies	GAAGCCTCTTTCTCTCTCTCTCTTTTTAAAAATCT[A/G]ATTTATAACATTTGAAATACCAAACAGATTCTTTA	A // G	0.644
Affx-961054561	2	21423439	Subspecies	TGAGGGAAAGGGACAATGGGAATTTATTGTTCAAT[C/T]GGCACAAAGTTTCTGTTTGAGGTGATGAAAAAGTT	T // C	0.666
Affx-961054565	2	21479678	Subspecies	TAACTGCCTAAAATTTTTTGACTGCTTCTATGAGA[A/G]CCTTTTCATACTGTTCATGGGGTTCTCAAGGCAAG	A // G	0.706
Affx-961054567	2	21565355	Subspecies	TATATGTAAATACATACACTGCCCTGGAAGTATTA[A/C]TATGTGGATTGAGGTGGAAATGGGGTAATCCCTGG	A // C	0.716
Affx-961054568	2	21579879	Subspecies	ATACAAAAATATTTGTTTATGAGATGAGCGAGATG[C/G]ATGGATGGAGAGAGATAAGAAAGAGCTCTTCTTTT	C // G	0.714
Affx-961054569	2	21581765	Subspecies	CCTTCTTAGCTGTGTTTCCCATAAACTGGGGACAG[C/T]GTGAGCTGGAGTGTCCTAGCCAATATGCCCAACTG	T // C	0.644
Affx-961054570	2	21585239	Subspecies	TCAGTTATCTATAGGCCCAAGGAGAATGATAACCA[C/T]GATAGACAAAGATAAATCCTGACAGAGCACAAACC	T // C	0.65
Affx-961054571	2	21585347	Subspecies	CAGGGAATTGTTGCGTTTGCCTGTTCCAGCCAAGG[A/G]TCAGTTACATTTTCAATGCATTTAGTCAGTAAATC	A // G	0.702
Affx-961054573	2	21594458	Subspecies	AGGAAGATGTCCAACAGTCAGGAGAGCTCTGTTTC[C/T]CCTGTCTTTGAGTTCAAACTCCCTTTGCCAAATCA	T // C	0.686
Affx-961054574	2	21595970	Subspecies	CATAACCTCCGAAACAATATGTCTAAATACATACC[G/T]TTTTAGGATAAGTATGTTAATAATGTGACTTAAGG	T // G	0.68
Affx-961054575	2	21598282	Subspecies	GGCCGAGGATGTGACACTGGCACAGGGGAAGGAAA[C/G]TGACACTTTCTCCCAACACCTGAGGTGACAAGGCA	C // G	0.612
Affx-961054580	2	21636624	Subspecies	TATTTTTCTAAGCATAAGATCTCTCTCCTGAAAAT[A/G]GGAATAGTAAAAACTATTTGAAGGCTCAAGTGAGG	A // G	0.716
Affx-961054581	2	21639335	Subspecies	ACGACTGAGCACACACACATTTATGCTTCATAGTA[C/T]GCTATTCAGACCACCGTATCTGAGAGCTACAGACA	T // C	0.616
Affx-961054582	2	21640137	Subspecies	TGTAGAAGAGAAACTACATATAACTTAAGATATAT[G/T]AAATTACTTTTTCTATGCAAAAAAAGTCAATTTAT	T // G	0.62
Affx-961054583	2	21641690	Subspecies	AAGTCTCTAGTGATTATTTAGAGAATCTCAAAGCC[A/G]TCATTTGAAACTCGGTTTTCAGCCTTCTTAAATAT	A // G	0.732
Affx-961054586	2	21683439	Subspecies	GTTATCACAGATCATTTATCTTCTAGCTAATATCT[A/T]ATGGGAAAGGTTTCAAGTTATAGCCATATAAGAGT	A // T	0.748
Affx-961054589	2	21806678	Subspecies	ATAGTTTGTTCAGATAGTTTGAGACAGAGTTAATT[C/T]CTAAACAGTAAAGTATCTTCTCAGCTGTACACATT	T // C	0.724
Affx-961054590	2	21806856	Subspecies	AAAGATGGGGAAAATATACCTAATCTGGGGTGATA[C/T]GGCTTTAGAGGTTACAGTATCAGACTTGGCATTCC	T // C	0.66
Affx-961054591	2	21825389	Subspecies	ATATTAAAATATAAAAGCTAATGTGTAATGATTAA[A/G]TAAATTTAAGCAGCATATTTTTGTTTATTTCTTGG	A // G	0.752
Affx-961054599	2	22005624	Subspecies	ACCAATCTTGATTCCAGCCTGAGATTTATCTAGCT[A/G]TAACTTGAACAAGTTATCATAACTGGTCAGAAATG	A // G	0.606
Affx-961054600	2	22011879	Subspecies	CACCAATGAAACTTAATATACAGTAGGGATACCTA[C/T]AGAAATTTTGATTCAATAGAATCAACATGGGACCC	T // C	0.698
Affx-961054601	2	22013305	Subspecies	TTAGGCTCATTAAAGGTAGATATTACCAAATTCCC[A/T]TTTCCATATAACATTCTTTTGGAACTCATCAGTAC	A // T	0.762
Affx-961054603	2	22026221	Subspecies	TGGTCTTTATAAAACTGGTTAACCGCACCTTCTTC[A/G]GCATTAGTGGTTGCAGAATAGACTTGGGTTACTCT	A // G	0.716
Affx-961054605	2	22030104	Subspecies	AACAAGTGAAGGACTCTGAGGTTCACAGGTGGGTA[A/G]CGTCACAGCTAATGCTTCAAATGGTCAAAGGTGTC	A // G	0.692
Affx-961054608	2	22052579	Subspecies	GAATGTTACAGAATAAAGCATGATGCTACTAACAC[A/G]TTCTTTTTCACAGGACCAGTATCCCTCAGCCTTAG	A // G	0.714
Affx-961054610	2	22061103	Subspecies	AGAAGCAGAGGTCAGGAAAGAGCAAAGATGCTATA[C/G]AGCTGGCTTTGAAGGGGGCCACGAGCCAATGAATG	C // G	0.672
Affx-961054611	2	22062084	Subspecies	CACCAGCATTCCTGAATTGTTTTCATTTAGCCTGC[C/T]CAGAATATTCTAAGAAGTTAAGCCGGATGATAATT	T // C	0.692
Affx-961054612	2	22070179	Subspecies	AATTAAGGTTTTGTTCCCATGGTTCTCCGATTTGT[C/T]TTTGTGTTGAGCACTGGAATAAATGGTACCAAAGA	T // C	0.68
Affx-961054613	2	22071738	Subspecies	GTGAATCGAAGGCGGCCTTTTGTGCTGGGTCTTTT[A/C]TAAGTTGGGAGGACCTCAGTTGTTATTTTTCACAT	A // C	0.684
Affx-961054614	2	22082949	Subspecies	AAGAAATTATTGAGAAGTGAAAGATTTCCCTTCTC[G/T]ACATTTTTTGTTAGTTTTAAAATGCCAGTTAGTTA	T // G	0.662
Affx-961054618	2	22108276	Subspecies	CTATCTAGGAACTCCAGACTCTCCAAGGGACTACT[A/G]CTGTGCCCAGAGCTGTGACAAAGCTAAGCTACTGC	A // G	0.65
Affx-961054619	2	22114977	Subspecies	GACTCCTGAATCCAACTGCCTGCTCAGACTTCTGA[C/T]AGACACATCAAACTAACAGAACTCATGATTTTCCT	T // C	0.604
Affx-961054622	2	22142447	Subspecies	TCTCACAAGTCAGCTGCTTAGGTCTCCATTGCCAA[G/T]TGCAGGGGGCTCCAGCCCCATGTGGGCTGGTTTGC	T // G	0.672
Affx-961054623	2	22143877	Subspecies	GTCCCATCCTTTTATGTCTCTTATAAAAAAACACC[A/T]GTCATTGAATTTAGGGTGGGTCTGAAAGACAATCT	A // T	0.626
Affx-961054624	2	22153621	Subspecies	TGCAATAATGACAGCCTCAAGGCTCACATTAGTCC[C/T]GGCTCTGCAGAGTCTTGGGACATCCCTGCCACAAG	T // C	0.64
Affx-961054626	2	22170835	Subspecies	GTAAAGTGAATCAAATTTTCAAAATTTTCTATGAT[A/C]TAGCCCAAATTTTATGAAGTCTTCCTTCCTCCTTC	A // C	0.692
Affx-961054627	2	22173430	Subspecies	CAGGAAACTGGGAAACTTTTTTTCCCTTAGGCATG[A/G]GGGAATAGATTTTGAAAGCAGAGAACCTTTAGACT	A // G	0.62
Affx-961054628	2	22174707	Subspecies	GTATTATTTTCACTGTAGCATTCCTTTCAGTATAG[A/G]ATTGTTGTATACATCATCTCTACTGTGATGAAACA	A // G	0.698
Affx-961054629	2	22174829	Subspecies	TTTGCTTCCTTGTTTTTGCTGAAAATGTGTTTCTT[A/G]TCACTTAAAAAAATAAATTACAGTTTTTACCTTGT	A // G	0.646
Affx-961054632	2	22236221	Subspecies	GTTATTACTTTGAAACAGCTTTGCAGAGGGAGATA[A/T]TCCTGCTGGCCATCAGCTTGGCCAAGCAAGCGATG	A // T	0.672
Affx-961054635	2	22343791	Subspecies	AAGATGAGAACATGCTGAGAAAGAGACAGAATGAT[A/G]GAGTGCCTGCAAGCACATCGGGAGTAAGGCCTAAA	A // G	0.654
Affx-961054636	2	22346197	Subspecies	GGGTAACAGATATTTACCTGGTGCCTACTGTGTGC[C/T]AAGCACTGTTCCAGGTACTAAGGATACCTCAGAAA	T // C	0.626
Affx-961054637	2	22361798	Subspecies	CCTATTAGATGAGTTTATTCATTTTCATATTAAGG[C/T]AGAATCTCCAAATAAAAAATATAGTCAACCATTTT	T // C	0.624
Affx-961054638	2	22363513	Subspecies	CAAGGAACTCAGAATTTGTTGAGGTGGCACTGATA[C/T]GAAACAAGGTACCAGAGCCATCCAGGGAAGGGGAT	T // C	0.688
Affx-961054640	2	22381276	Subspecies	CACATAAATAAGAAGGCTCATGTTTGAAGGGGAAA[A/C]CTGCTATATGTGTATGTTCCCTACACATATGTCCT	A // C	0.714
Affx-961054641	2	22401738	Subspecies	AAGACAATAACAAATATGTAGTATTAGTCCATAAG[C/T]AAGAAACATAAAAGACAAATAACAGGTCAATTGAA	T // C	0.752
Affx-961054644	2	22438522	Subspecies	TCATATGATAAGAAGAAACAAGAAGAGTTAATGCA[A/G]CAGTATCTAAAAGAACAAGAATCATATGATAATAG	A // G	0.694
Affx-961054645	2	22441729	Subspecies	TTTGGTGGTTTGAATTTACGAGTATATAAAAGCAA[A/G]TTTATGAGTATTTGGAGTGATTCGCTACATTTTTC	A // G	0.748
Affx-961054647	2	22460524	Subspecies	ATTGCCTTCTCCGGATTAAGATCTACCATATTTAT[A/C]ATTGTTTTCTATTTGTTGCCCTTGTTCTTTGTTTT	A // C	0.718
Affx-961054649	2	22491890	Subspecies	GATCTACACTACAGCAGTGATTATCAGGTCAGCAC[C/G]GTGTGGGAGTTGGGGAGATACATTAATAACGAGTT	C // G	0.64
Affx-961054659	2	22867828	Subspecies	GCAGGTAGATAACTTGTTTTAGAAAATAGGTCTCT[A/G]TAAAGAAGGGCCATACTTGGACCCAGGAGCTTTGA	A // G	0.71
Affx-961054660	2	22875442	Subspecies	CTTGCTCTTCCTTTTACCTGGAATTCTTGCCCCCA[A/C]CTTCTTGCTCTTTGTCTTCCTTCAGGGTCTGGTGT	A // C	0.648
Affx-961054666	2	22930618	Subspecies	GCAGAGGAAGGCTCTTTTCAGCTGTGACTGAAAAG[A/G]TCAAATACCAAGCACCATTAACTAAAGGTTCATTC	A // G	0.666
Affx-961054667	2	22933721	Subspecies	TGAGGACGGTGTCTACTTGATGGAGTTGTGGAGAT[A/G]AAAGGGTTAATACAGGAACCCATCTAGAACAAGGT	A // G	0.684
Affx-961054673	2	23058805	Parentage	CAAGGTAACTGAATTTCTTCTTATTCCTACCAATA[A/G]AGAAATACTTTAAACCCTGAGTTTAAACATAGATC	A // G	0.734
Affx-961193248	2	23275990	Parentage	ATCTGAAAGAAGATCTACCCAGCAATAAAGTGAAA[C/T]GCAAAGATTGAATCAGTCCACACAGCATCTCTGAA	T // C	0.734
Affx-961054695	2	23831462	Subspecies	CTCCACACCGGACAATAATGCCTGCCGAGGATCAC[A/G]CTCTCCAGGTAAACATCAAGATGCTCATCACTGTG	A // G	0.632
Affx-961054699	2	24031065	Subspecies	CCACAGTAGCCTGATTCAATCAACCAGTCAGATGA[A/C]TCCTTTAAAAAATCACTTTTTGATGTGATATATAA	A // C	0.64
Affx-961054700	2	24031494	Subspecies	CAAATGTTTATTGCATGTAATCAGTGTTGTGCTGA[C/T]AAATACCTCTCTAGGGGGAAGACAGCCTGATTGGT	T // C	0.726
Affx-961054701	2	24034599	Subspecies	GAAGGAGAAATGAAGACCATCAGTAAAAATAGATT[C/G]AGTAAGAAATAGATTCATGACTATATTTACAAATA	C // G	0.728
Affx-961054702	2	24039391	Subspecies	TTGGTCATGAATTCAAACAGGGCATAGTGGGAAGC[A/G]TGGTGACTGTGTCTGGGACTTCAGCTGGAAGTCCA	A // G	0.636
Affx-961054703	2	24039470	Subspecies	GAGTGGAGCCATATAAAAGCTTGCTCATTCATGCA[C/T]CTGGAAGTTGATGCTGGCTTTCAGCTGAGGCTTTC	T // C	0.69
Affx-961054705	2	24040359	Subspecies	CTATTTTAAATAGGTAAAGATTCATTATTTCATGA[A/G]TCTGAAAAGTCCAGTGGCTCAGATGGACTCAGTCA	A // G	0.634
Affx-961054706	2	24040954	Subspecies	AATCAGTAATATACATAGAGACATAAAAGGTGATT[C/T]ATATAGGAACTGGCTCATGTGTTATGGAGGCCCAG	T // C	0.718
Affx-961054707	2	24041376	Subspecies	TTACCTAGAAATAGTGTTTCACCAGCGATCTGGGC[A/T]TCTCTTAGCCCAGTCAGGTTGGCATACAAATTTAA	A // T	0.666
Affx-961054708	2	24042385	Subspecies	TTGTTGTTTGCTTGCTTTTAAGAAGAGTTCTATCC[A/G]TCAGAAATCTGCCCTGATTGTTTTTCTTTTGGGGC	A // G	0.682
Affx-961054709	2	24043156	Subspecies	TAATATTCTGAGATGTTACCTAAGATTTTCTTTCC[C/T]GAATTTCTTTTACTTTTTGACTTTATTCATTTAGT	T // C	0.692
Affx-961054718	2	24604543	Subspecies	AAATATGGCATGTTTACATAACTGAACCATGGAGA[C/T]AGTCCTACCCTTTGACTCAATAACTGTACTTCCCA	T // C	0.692
Affx-961054720	2	24643155	Subspecies	GTACAAGAAAAAATAAAAACTTTGATCAGTATTAT[C/T]CTTTTAATGAGGTGTCAGGACACAAGTATCTTCTT	T // C	0.704
Affx-961054722	2	24658013	Subspecies	ACAATATTAACAGTTATATGTATGGACTCCCTGCA[A/T]ACTGGAATGATTGCAGATAATGGAAAAAGTCAAGC	A // T	0.736
Affx-961054725	2	24668544	Subspecies	GGCTGCACACAGTCCATGGAGTTGCAAAGAGACTA[C/T]ACTAACACATGCCCCAGTTGGGTATCACATTATCT	T // C	0.61
Affx-961054726	2	24673222	Subspecies	AGTTTATTAATTTATGGTTATTGATTTTTCTGTTC[G/T]GACTAAAAAACTTTACCTACCTCTGAGTCATGAAG	T // G	0.754
Affx-961054727	2	24676908	Subspecies	TTGTTAAAAGAAGTTTGAACAGACTGAAGAAAGAG[A/C]TGTGATGGTGGCAGACAGTTAAATCTACTTCAGAA	A // C	0.698
Affx-961054729	2	24685477	Subspecies	CAGAAGGATAGATAATGTTAACGGGGTTGAGGTAA[A/G]AATTCAGGGGAAATAAAAACAAAATCTCAATGTAT	A // G	0.692
Affx-961054733	2	24717494	Subspecies	ACAGAATTTCAGCATAAGGAAATAATTAACCTGGA[A/G]TTAATTTTAATAGAATTTTGGATCTGTGATAAAGG	A // G	0.662
Affx-961054735	2	24736892	Subspecies	GTAGTGGGATGTTTTAAGTGACTGGAGAAGAGCCA[A/G]TTCTTTCATCTTGTAGCTCTGGAGACCAAAGCAAA	A // G	0.7
Affx-961054736	2	24739342	Subspecies	AAAGATTAGTGTGAAGTTCAGTTTGTATTATCAAA[C/T]TGGTATTTATAGGGTTTTTAAAATACAAGACATTC	T // C	0.696
Affx-961193359	2	24965446	Parentage	TATATAGGATTTACATTGTATTCACATAGCATTTA[A/C]ATTGTATTAGGTATTGTAAGTAATCTACAGATGAT	A // C	0.746
Affx-961193374	2	25541460	Parentage	ACATGCAAATTGAACCTACAGTACAATTTTTACTT[C/T]GCACTTGTTAAAATGGCCAACATCAAAATTCCACA	T // C	0.742
Affx-961054753	2	25799445	Subspecies	TGAAAGAACAAATAAATGAACCAAGGGTCCTGTTA[C/T]GGCATGTGGCAGGAAAGGACTGAGCCCCCAGTTTA	T // C	0.676
Affx-961054754	2	25812922	Subspecies	TCTCTGACCAGGGTCAGGTAACCTTTCTGAGCTTT[C/T]GGTTTATACTTTTCACCTACTTAACATAGCTGGTG	T // C	0.754
Affx-961054755	2	25822587	Subspecies	GTTTTATTTCCTCTAGAAGTTGACTAATTCTACAA[G/T]ATACAAAGGGACCAAACTAATCACAGGTGTTTTGG	T // G	0.656
Affx-961054756	2	25822701	Subspecies	GACCTATTATCAAAGTATGGCATTTAAGGTAAGGA[C/T]AACAGATAGATCAATGGAACAGAATAGAGTATCTA	T // C	0.744
Affx-961054773	2	26592010	Parentage	ATATGCAACATGGAGACCTTAGAAGAGTTCCAATA[A/G]TAGTATACCAAGCCAGGGCCTTGCTACTCCAAGTG	A // G	0.698
Affx-961193403	2	26679658	Parentage	AGAGCATAATTTAACTGTTTCTCCATCATTGAATA[C/T]TTAGAAGTTGTTTTCAGTTTTTCAATATTATAAAT	T // C	0.728
Affx-961054775	2	26696364	Subspecies	TTAACATTCTCATGATCCCTTTCTTTACTCCTTGA[C/T]TTCATCCTCTTTTCTTCATGTCTATTATGCTTTGT	T // C	0.688
Affx-961193409	2	26790903	Parentage	ATACATGACTATGAGTATTATCTTAAAACTCCATA[A/C]GAACATGATCCAAGATCATGTTCTTCAAATTCAGT	A // C	0.756
Affx-961054790	2	27593887	Parentage	AAAGAAATTTCACAGGAAGAAAGCTGTCTGGTAAT[C/T]TGAACAAATGCACAAGGTCAGAAATTTAGCTGATT	T // C	0.7
Affx-961193444	2	27639421	Parentage	GCCCTAAACCATAGCTGATCTTTCTCCTTTAATCT[C/T]TACTGCCTGTCCATACCAACCATATAGAACACATA	T // C	0.73
Affx-961193446	2	27646339	Parentage	TGTCCTATACAATACTGCTACAGAGATGACTAAAG[G/T]TATTATGGATATTTTTCCCTAGATAAATGATGTAA	T // G	0.772
Affx-961193450	2	27726120	Parentage	TCCAGATACAAGATCAAAAGCACAATCCATGAAAG[A/C]AAAGAATTGATAAGATAGACTACATTAAAATTAAA	A // C	0.752
Affx-961054792	2	27740572	Subspecies	AAAAGAATGATGTTATAGCATTGTTTCTAATAGCA[C/T]TCATAAACAAATAACCCCAGACAATGGGATATTAT	T // C	0.73
Affx-961054793	2	27743006	Subspecies	AGAAACCAAGACTGTAAGAGGAAGAACGGGTATGC[A/G]TATTGCTGCATGGACTAGGAGCTACAGTTGCCTTT	A // G	0.66
Affx-961054796	2	27783593	Subspecies	GGTAATTTGATCTCAGTCTTTAGGAGAACAGACTT[A/G]TTTTTATGAACTGCTAGGAGCTTGAAGGCTTTTTG	A // G	0.644
Affx-961054799	2	27824753	Subspecies	TAGCTGACTTCTGCTGTGCCCTCAACTATTCTCTG[A/G]GCAGTCTTCTAAGCATTATTATATATAATCTGCAA	A // G	0.658
Affx-961054804	2	28030769	Subspecies	AGCAGCGTCTCATCCTTTAACAGCTGCTAGCAGTT[A/G]TTTGAGCAACAGTCTAAGGAAATCTTACTGGCTGA	A // G	0.674
Affx-961054809	2	28035056	Subspecies	GCCACCATCTATCAGCTCTTGCCTGGATTATTACC[A/G]TAGCCTCCTAAGAGATCCTTCTGCCCATTCCCCTG	A // G	0.634
Affx-961054810	2	28035667	Subspecies	GATTTTATTGCACACTAAAATCTGAGAATCACTGC[A/T]GTCTGTTGTGCTTCATAATTGTATTATCTGTTTTT	A // T	0.626
Affx-961054811	2	28036114	Subspecies	AAGAATACTGAGCAATAGAGTTTATTGTTATGTTC[C/G]TTATATTTTAGTCACTCCTAATGTTGAGAGTTTTA	C // G	0.704
Affx-961054812	2	28036202	Subspecies	ATCACAGATTTAAAAATCTGCAGATTCTTTGAAGA[C/T]TGCATTATCCTCCACTAATCTGTCTTGAAACTTTG	T // C	0.782
Affx-961054813	2	28036970	Subspecies	TTTGAAAGCATTCAAATCAGAGGGTGGTCTTGGGC[A/G]TGGAGCAGAGAGAAAGCCATGCATGTGTCCTGTGA	A // G	0.62
Affx-961054815	2	28039278	Subspecies	CTTTGAATAGCAACAATCTAGGTGAGAATTTTGAA[C/G]ATTTGCCTCACTTCTATTTTCCTAGAAGTGTATTG	C // G	0.76
Affx-961054816	2	28039852	Subspecies	TGACAAGGAAAGGAGCCTTTGTAGGGTGGTTCTGT[A/G]TTCAGGCAGAAGATTTTCCCACAAGGGTCTGTACC	A // G	0.694
Affx-961054818	2	28041230	Subspecies	TCAGAGGGTGGAAAGGGCACCTTGGAATTACTAGC[A/G]AAGAGAGGATGATGCCTTTAACATAATTTTTCTAT	A // G	0.61
Affx-961054819	2	28119375	Subspecies	ATTTAAATAGCTCCAAATATTTACAAAGCTAGTAA[G/T]TAATATATTCTCAGTAAGAAAACTGAAGACTTTGG	T // G	0.712
Affx-961054820	2	28121820	Subspecies	GTATGCATTTTGAGGAGTGCACATATAAATAAAGC[A/G]TAAGTACACAAAATTGTGATAGAATCTGCTGACTT	A // G	0.726
Affx-961054821	2	28122606	Subspecies	AGTTACACCACTTATCTACTGAGATTTATAGCCAG[A/G]CTCAGTGAGAAATTGGTCCTAGTGTGTCCCTAACT	A // G	0.63
Affx-961054822	2	28122962	Subspecies	CCACACCAGCTGCTCTGAATTCAGAAGTCCAGACT[C/G]GAATCCAGGAAGGTTGTGTGCTCCACGTCCCTGAA	C // G	0.632
Affx-961054823	2	28123214	Subspecies	AAGAATTTTGTCATGGAGTCTAGGCTAGGTTCATC[A/G]TTTCCAAACTCTGATATTTCGTTCTGAAGAGAAAA	A // G	0.738
Affx-961054826	2	28164157	Subspecies	TCCATTTAACCGTGTTCCTTTTAAATGTAGCACTC[A/G]TATTTAAATGCAGGACTCCAGGTGGGAGCTAAGCA	A // G	0.69
Affx-961054827	2	28165260	Subspecies	GTTAAATGCTGTTAAGTTTTTGAGATCACTCTGTG[C/G]TGATGTAAACATAAACAGCAGATACACTCATTCAT	C // G	0.672
Affx-961054828	2	28166068	Subspecies	ACTGGGAGGGCTGAGTCATAACCTCTGGACAACCA[A/G]TGAAGTCTCTAGAATTAATCCTCTTTTTGATTAAG	A // G	0.72
Affx-961054829	2	28166160	Subspecies	TTTGAATTATATCTGCAAAATCCCTTCACTTTTGC[C/T]ATAAAATGTAACATAATTACAGGAGTGAGAGTCCA	T // C	0.722
Affx-961054830	2	28166409	Subspecies	GAGCAAGCGACTTTTAGGCAGAGCAAAGCTGATTG[A/C]AAAGATTCTGAGCAGGAAGCATGTCTTAAGCAGTT	A // C	0.676
Affx-961054831	2	28166533	Subspecies	GGATTATCAGGGGCTGAATCATGTAGGGCCATATA[A/C]CCTGTGGTGAAGACTTTGGATTTCACTGTTTGTGC	A // C	0.674
Affx-961054834	2	28168423	Subspecies	AAGAAAGAAGGAGTGGGAAGCTGCATCAGTTGTTA[C/T]TCGTAGATCAAGTACAACGGGAACTGAGAATTCAT	T // C	0.74
Affx-961054836	2	28172981	Subspecies	TAATTTGCTTTTTAAACTGAGCCGTTATATGTAAG[C/G]TTGGAGAGAAAGGATTAGACCTTAGATCTCCATGT	C // G	0.722
Affx-961193466	2	28182504	Parentage	ATCCAAGTAGCTAAGATAAATCTTTTTCCTTTCTC[A/C]AAATATTCTGTTTCCCTTACCATCCCATTCTCAGA	A // C	0.742
Affx-961054842	2	28341906	Subspecies	TCCATCTATCTTGGAGGCTCTGTGGCTTTATACAT[A/G]GTAGGTTCCACGGCTAATGAAAAAAAGAATGAAAA	A // G	0.668
Affx-961054843	2	28354655	Subspecies	TTAAATTATAAAATGGGATCTTTACTTCCATTATA[C/T]TTTCTACCTAGTTCTTGTTTATATTCTGAAGACTG	T // C	0.676
Affx-961054844	2	28395388	Subspecies	TGATGTGACTTTTCATTGACAAGTGGAGGAATTTC[A/G]TATGTTGCACCTTTTTCAGATGTTTTTCTCTTTCT	A // G	0.704
Affx-961054850	2	28653061	Subspecies	CTAGGAGAAAGAACTTGGTGGTGAGCAAACAATTA[C/T]CCTCTGCCTATCTGTCAACTCTGTTGCCAATTATT	T // C	0.692
Affx-961054852	2	28655682	Subspecies	AACAAATAGCTACATATTTTTTCAATATAAGTAAC[A/G]TTGTTTAAATATTAAAAATATATTTGGGAAGAATC	A // G	0.664
Affx-961054853	2	28655758	Subspecies	ATATTATAGTCTTTGATTGCTTTATCTTGACTCCA[C/T]TATTTTAGTTCATGCTCTACGGTCATATTATTTTT	T // C	0.766
Affx-961054856	2	28659318	Subspecies	AAGTCTTCTCCAGCCACTTCCTTCCTGCATACTGG[A/T]ATTCAGCAACAGGGTTATTTAGCAGTCTTTGGACA	A // T	0.708
Affx-961054857	2	28660878	Subspecies	GTTATTTCTGTATATTGGGATCTCTGCACATAAGC[A/G]TACATAGGACAATATCCACAGAGTACCTGGAAGAT	A // G	0.688
Affx-961054858	2	28662647	Subspecies	AATTAAAATATAAGTGTATTTCTACTAGCTTTGAA[G/T]TTAGAGCCTACTATATTTGAAATCATTACAGGATC	T // G	0.72
Affx-961054859	2	28664891	Subspecies	GAAACAGAATATTTACATAGTGTCAAAGCAGCTCC[C/G]CATAAGATGTTTATTAATTACAAAGGGGAAAGAAA	C // G	0.662
Affx-961054860	2	28668723	Subspecies	TCTTAGAATTATTAGTTAATACATTTAAAGCACTT[A/G]GAATAGGGCCTAATATGCAATAAGCACATATGAGA	A // G	0.69
Affx-961054861	2	28669064	Subspecies	TTAGGAGTAATCTGTGGGTACAACTATATGTCCAT[C/T]CATCCATCATCTACCAACCTACCATTTGTTGGCCA	T // C	0.726
Affx-961054863	2	28670643	Subspecies	CCAGTTAGAACCTACCAGGCTCAAGATGGTGGCAG[A/G]TTTATTATACACTTATTATAACTCATTACCATGTT	A // G	0.72
Affx-961054864	2	28670758	Subspecies	AGGCAAAAAGTTGGCAGTGGCCCACATCCTGGAAA[A/T]CCCCAAAATAATTAGAACAATGAAATTACAAGCAC	A // T	0.694
Affx-961054865	2	28672233	Subspecies	GCATTTTGTTTTAGGATGAGGTGAGTTAATTCTTT[C/T]GTTTATCCACAGTCTATCAGCAACCACCTAGAAGA	T // C	0.724
Affx-961054866	2	28675446	Subspecies	AAGCACATTTAGGATGGGAATGGGCAATAATATTT[A/G]TTCTCTAACCATAGATTACTCTAGGATCCTTAGAA	A // G	0.732
Affx-961054867	2	28680497	Subspecies	AAGGCTGGGCCTTAAGAGATATGCAGCTTTCACGC[A/G]CATGCTGGAAATTCAACTTCTTTGAGCCCAACCAC	A // G	0.63
Affx-961054868	2	28688778	Subspecies	TAAATGAAGCAATTTACATTGAATCTACCTGCCAG[C/T]CACACTGGTTGTCTCTCCCTAACTTTGATGAGTTA	T // C	0.668
Affx-961193481	2	28690915	Parentage	GAACACACTGTCTCTCATTTTCAGTCAAATGAACA[C/T]GTATGTAAAAATACAAGTATACGCACAGTCCACTG	T // C	0.746
Affx-961054869	2	28697737	Subspecies	TCAGTATTTTATATCTATAATAAAAATTTAAAGTA[A/G]GTTATGGCAACTTTTTCCAAAATAATATATTATTT	A // G	0.76
Affx-961054870	2	28701962	Subspecies	CTTCATTACTGAGGACTCCAAGACAATGTGCTATA[A/C]AAGTATCACCCACTTCAAGAAACAGTCCAAAACTG	A // C	0.692
Affx-961054873	2	28746343	Subspecies	CATCGTTACTCATCACCTATGCTTCACCCACCACC[A/G]TTCTGATTCACAATGCAAATACTGCCCTCATTTGC	A // G	0.66
Affx-961054875	2	28805217	Subspecies	TACAAATAATCACTTATGAATACCCATCAAATCTA[A/T]TCACTATTTGCAAACACTTTTAATAGTGGAATCAA	A // T	0.814
Affx-961054877	2	28831465	Subspecies	TTGCAAGATGGGCAGCTCCAGTTAGGGATCAGATG[C/G]AGGTTGCTGCTAAATCTCAGAGGACCAGGCAATCA	C // G	0.636
Affx-961054879	2	28850296	Subspecies	ATGTATGGTTTGAGTTAGGCATCAAATTTATTTCT[C/T]ATATAGCCAACTAACAGTTTTTTGAAAAGATCATC	T // C	0.706
Affx-961054880	2	28859172	Subspecies	GCTCTTTGAATGTGGTGGGCAGAAGAAAGAAGCAG[A/G]GACTAGCTTCCTAAAGTTATAAGCTAGAATCAATA	A // G	0.692
Affx-961054881	2	28860626	Subspecies	AACTAAACTCATATCCCATTTAACATCTTGTTACA[C/G]AAGAGGTTGGCATTGGAGGTAACAGGTCTACCCAT	C // G	0.752
Affx-961054882	2	28864983	Subspecies	CTATTTTATAACGTAGACTTGTAATTTTAAGACCT[A/G]CTCCTATTTTCATTACCAGTTCTATATCACAACAT	A // G	0.702
Affx-961054888	2	29009453	Subspecies	ACAGGTCTAGAGAAGGAGGATTTTTAGTACTCCAT[C/G]AGTGAAACAGCTGTGAAAAGAAGAGAAGCAAAAGA	C // G	0.726
Affx-961193517	2	29056315	Parentage	CAAAATATTTATGGTGGATTTCTAAATGAAAGGCT[A/G]TAACCCATACAGGTACAAATTTTAAAGAATAACAT	A // G	0.742
Affx-961054896	2	29509037	Subspecies	GAAGAAGTCGAAGGTGTCTATTTCCTGTTTTTATT[C/G]CATTCCCTTACATGGTCCCACGTAAAGGGCCAATT	C // G	0.652
Affx-961054899	2	29642725	Parentage	GCTGGATATGACTTAGCAACTGAACAATAAAAACA[A/G]CAGACTTTTCTTAAACTGTACATATTTTTTCCCAT	A // G	0.638
Affx-961193558	2	30156794	Parentage	TGTAGTAAAATTATTAGAGTAGTATGTTTTTAGTA[C/T]TTATTACCTTTTCTAAAGTTATACTTTTAGGTTTA	T // C	0.756
Affx-961054916	2	30689099	Subspecies	GACATTTGGTTTTTCCAATTACTTGCTGGGAAATC[C/T]TAACTACTTAACCCTTCTAAGCTTCAGTTTCCTCT	T // C	0.772
Affx-961054917	2	30690673	Subspecies	TTTGTTTCTATGAAAGATTAAATTATCTTTGTTGG[A/G]AGTCAATTAAGATAATAGGAAGTAAAATGCAATTC	A // G	0.73
Affx-961054918	2	30691246	Subspecies	TTAGCCTTGCACTAGCAACTGAATTTCTCTATTCA[C/T]ACTCCTTGATGAAAAAATCCACACAAAGACATCTG	T // C	0.66
Affx-961054920	2	30694682	Subspecies	TCCCTTGTGGTCTTATGTTTGGTGAACTTGAACTT[G/T]GCACAGTTGCCTTGACTGGAAACACCCCTTCACTC	T // G	0.708
Affx-961054926	2	30751146	Subspecies	GTAGGAGAAAATAGAGGCCCAGAGTGGTTCTCATC[C/T]AAGGTCACAAGCTGGTCGATGAGACGCATGTTCTA	T // C	0.608
Affx-961054928	2	30752064	Subspecies	CATGCCCAGAGCAGTGCAAACTCTGAGTAGCCTCA[C/T]GTTCTCAGCTGAGGCTGAACAAGCTGACTGCTTGA	T // C	0.628
Affx-961054929	2	30752113	Subspecies	GCTGAACAAGCTGACTGCTTGAATCTGTTTCAGCT[C/T]TCCTATTGTAAACCAGCATCCTTCACATGGTATGT	T // C	0.672
Affx-961054930	2	30752223	Subspecies	TCAGTTTGCTGTTTGAAAATGGCCCCAAACATAAT[A/G]CTGAAATGTCCGGTGTCCCTAAGTGCAAGGCTGTG	A // G	0.678
Affx-961054931	2	30753547	Subspecies	CCACAAAAAGCAGAAAACTTACAGACATAAATTCT[C/T]CGTTTTGTACTTCAAGATCATAGTATCTCTTTTGA	T // C	0.728
Affx-961054932	2	30754156	Subspecies	TGTTGAATCAACCAAGAATCAAAGCTCTATGACCT[A/G]CCTATTTCCTTGATCCCACACTATCTTCTGCCATA	A // G	0.724
Affx-961054933	2	30754407	Subspecies	TGCTCCAGCATCGGTAAAAAGCAAAAGAATTTGTC[A/G]GTTATCAGTCAACTAATGCTTAATTCTCTAATTAC	A // G	0.652
Affx-961054936	2	30927975	Subspecies	TTCCTTCCACTGGGAAGCAGGAGCTCAGCAGAACC[A/G]GAATCTGCTTGCTCCTTGATCTCCGACTTCCTAGC	A // G	0.632
Affx-961193607	2	30978970	Parentage	TAAAAATACAGATACTTTTAAATAAAATAGATGGG[A/G]AAATGAAATCTCTGTAAAACATTAGCAAAAAACAG	A // G	0.73
Affx-961193608	2	31003773	Parentage	AAAGACAGCTAGAGCCAATCTGAAAAGGACCTGAA[A/C]GATTCAGTTAGAGAACTTAGATTTTGTGTGCTATC	A // C	0.774
Affx-961054949	2	31529280	Subspecies	CAGTCCTGTGCCACTTCCATCTTATTATAACCTTC[C/G]GTGATTGCAGCAGCAAGGGAAGGGAACCTAGAGAA	C // G	0.634
Affx-961054950	2	31529424	Subspecies	ACATCACCATACCTAATTTCAGTGGGGTGGAGAGT[A/G]TAATCCTCCCCTATACCTAAACCCAGAAAGAGGAC	A // G	0.664
Affx-961054951	2	31533076	Subspecies	AATCGGGAAGGAAAAGTCTGTTTTATAGCTAATGA[A/G]TGAGAGTTGTACAGTTTTCTTGATTTGAGAGTAGA	A // G	0.738
Affx-961054953	2	31535649	Subspecies	GTCTGATCCCCAAAACTATGCTCTTCATCCCTAGG[C/T]CTGTTACCCAGGATGTTTGCTACCCTGGATGATAC	T // C	0.606
Affx-961054955	2	31542225	Subspecies	TCCTGGCCTGTGATCTGTGTGACTGGTGAGGGTGT[A/G]TCTCAGGGCTGAACTTTGCACACTTTATCTCTGTG	A // G	0.72
Affx-961054957	2	31542359	Subspecies	AAGGTGGATGGAGAATATGCAAGAAAAGGAGAGGA[A/G]CCTTTAGGAGTTGAGAATGGAGGCTTTTTTCTTCC	A // G	0.648
Affx-961054958	2	31543009	Subspecies	GCAGAAGAGGCAGTGGTGCAAAATTGCTAGACTAC[A/G]CAGGCGCTAAACTAGCAGATTGAGGCTTGTAGTCT	A // G	0.698
Affx-961054959	2	31544166	Subspecies	TCTAGAAGCCTAGAGTCAGTCCTCTGTCTTGCTCT[C/G]TCCTCATTACTCTGACTTCCAGCACAATAGGTTAG	C // G	0.68
Affx-961054966	2	31682378	Subspecies	ACCATTTTTTCTACCACAAAGAAAACCTAGAGCGA[C/T]AGCATATTTTTAGAAATGCATGTCTGAGATAATCT	T // C	0.686
Affx-961054967	2	31689037	Subspecies	TTTGCCCTCGCTGTGGTGAAACGGTCACAGTCTTT[C/T]AGCAAAAGCCCTACAGAGTCATGCAGTGAGGAGGT	T // C	0.686
Affx-961054968	2	31694111	Subspecies	AACTAAAAAAATGTAGGGAATTTAGATGAGACTTA[A/C]TGCAGAAATTCAAGTTTTAATAATGCACTGCCAGA	A // C	0.728
Affx-961054969	2	31801359	Subspecies	CCTCAGCAGTTTGGGGCTTTTTTGACTACCCTTTC[C/T]TTTGTGAAACGTTTTCTTGGCTTCTACCTCTTATA	T // C	0.714
Affx-961054970	2	31802435	Subspecies	TACTGTGAGGGAACCACTGTCCTGAGGTGGGTGAA[C/T]ATCCTTCCTTTCATAATTTTATACCTTTGCAAAAT	T // C	0.636
Affx-961054971	2	31802960	Subspecies	ATTATGGCATTGATTTGCTTTAGATTGACTACTTA[C/T]AAGGTTGCACATCTTTTCATTTGCTTCTGACCATT	T // C	0.718
Affx-961054972	2	31803865	Subspecies	TTGAGCTTTAAGCCAACTTTTTTTAATAGTGTCAT[A/G]ATACAGAATATTTTGTTTTAGTTTAGTTAAATCTA	A // G	0.624
Affx-961054989	2	32400204	Subspecies	ATAAATGCTAAATTGAACTAAAATGCTAAATGGAT[C/T]CTAAACAGTTTAGAATACACATATTTGATAGTTTA	T // C	0.752
Affx-961054990	2	32409563	Subspecies	TCATATAATTAACTAATATTGATTAGGCTCTTACA[C/T]TGTGCTTGATTCTGTTGTAAACATCCCAAATCTAA	T // C	0.732
Affx-961054999	2	32849164	Subspecies	GTATATGCCACTACACATAAATGTAAAGAGTCAGA[A/G]TCCAGATTCTCTGTGTTCTTATCTTCCCTTTTACC	A // G	0.698
Affx-961055001	2	32922525	Parentage	TTATTGTGGCGTTCACTTTGTAGTATATACAAAGA[C/T]TGAATTATAATGTTGAACAGAAGAAACTGATTAGT	T // C	0.692
Affx-961055008	2	33288762	Subspecies	AATTTTTTTAGATTCCATTTTATATAAATATTTTA[C/G]AGCTCACTTTCAAAATCAAGATAGTGCCTGACTGT	C // G	0.624
Affx-961055009	2	33288994	Subspecies	ACATCATATAAACTACCTAAACAAAAAGATAGAAC[A/G]TTCTAGGAGATCTTTACAGGTGACAAAGATCCAAC	A // G	0.764
Affx-961055010	2	33289275	Subspecies	TTTTCTTCTTATATGTGTTTATTATATAGTTTATG[A/C]TATGTAGAATTGTGTGTATGATCTTAAATATTTAA	A // C	0.724
Affx-961055011	2	33299445	Subspecies	TAAAAGTTCTTGGCCGTAACTGGTCTTATGACCCT[A/G]CTTGACCCCAGGAGATAATAAAAGAAAACCTTACC	A // G	0.644
Affx-961055012	2	33303275	Subspecies	CATCAGGACTGGTAAACTCAAGTGTCTATAGGGCA[C/T]ACACAAGTAACGTAAATTTTAAAAATTGGCCAAAT	T // C	0.7
Affx-961055013	2	33311446	Subspecies	AAAACAAAACAAAACTGGGCTCACAAGTGATGCTG[A/G]AATCTCAAATGATGAGCTTATTTTTTTCTGAAAAG	A // G	0.674
Affx-961055014	2	33316735	Subspecies	CCAGCGTTTAATATATACCCACTGCCCCACATTTC[C/T]TGAAAGCCTAGTGCCATCCTAGATTTTGGATTAAA	T // C	0.656
Affx-961055015	2	33318836	Subspecies	ATTTAATTCTCTAAAACAATAATACTAATAAAACA[A/C]CTGTGGATATACAGTTATGTCATGTACTATACCAA	A // C	0.692
Affx-961193735	2	33517726	Parentage	CTGCAAGGGGAAACATGAGTATAAGTATAGAAAAC[C/T]CTATGGATAACTTTACTGTGAACAGAGGATAGGAT	T // C	0.728
Affx-961055029	2	34333773	Parentage	TTATGACAATACACTCTCTCATGTTTCTCTTTCTA[A/G]TTTACTGTTTCTTTCTAGCTCTTCCTCTTCTGACT	A // G	0.756
Affx-961055038	2	34753222	Subspecies	CATTTGTCCCTCATAAAACACATCTTAGGTCTCAA[C/T]ATCAATAAAGATACTCAGATGGTTGGGGGAGGAAG	T // C	0.632
Affx-961055041	2	34818544	Subspecies	ACCCCATATCATCCTATCTTTTGTAGGCAATTTTG[A/G]TCTTAGACAAGCTATTATATATAATATGTGTGTAT	A // G	0.63
Affx-961055042	2	34850259	Subspecies	AGTTTTTAACTGACCTACCTAGTGTTGCTTAAAAG[A/G]ATCAATAACCATAACTGAATAAATTTCTGCTGGGA	A // G	0.704
Affx-961055051	2	35236855	Subspecies	TCTCCCCACTACAGAACAGCTGATCGTCTATCAGC[A/G]ATAGACCCTGATGGCGTGAATTACAATTACACTAC	A // G	0.656
Affx-961055052	2	35252014	Subspecies	TGCCTGAGGCTTAAACAGCACTTCTTGTTTATCTG[C/T]TTTATCCGTACACTGTATAGGCATAGAGCACTGTG	T // C	0.744
Affx-961055053	2	35285484	Subspecies	TAAAGGCTATCCTGTGAAGAAAAGCTAAAAACAGT[C/G]AAGTTTTCATAAAGACTACAGGTCCTTAGACAAAC	C // G	0.746
Affx-961055055	2	35327686	Subspecies	AAGCAGTGTGATTGTTGGGTTGTAGAGCAAAAGCC[A/G]GAGAAGGCAATGGTAACCCACTCCTGTACTCTTGC	A // G	0.702
Affx-961055056	2	35330170	Subspecies	CCAAATAAAATCCACACATCTAGTTATAAGGGCTA[C/T]AAAAAACTTGCCATGAGTTTAATACAAGATAAACT	T // C	0.69
Affx-961055057	2	35334678	Subspecies	TAGCTGATTCAGTTGATAGTTGAACAACCAGAAGA[C/T]TGGGACACCAACCCCGCTAAGGAGTTGAAAATACA	T // C	0.702
Affx-961055058	2	35344619	Subspecies	CTCTGTTTGCAAGAAGGTCCTGAGGCCAAGACACA[C/T]AAAGACTCTTTTGGAGGAAATTTTGGCTGTGTGTG	T // C	0.626
Affx-961055059	2	35345028	Subspecies	CAACAGTTTGCTAATCAAAGAATTAAGAGACTGCC[A/G]CCATAGGACAACAAGGTTCTCTAGGCAGGTCTGGG	A // G	0.696
Affx-961055060	2	35345357	Subspecies	GCAGAATTTTCTAGCCTCTACTTGCTGGTGGGCTG[A/G]TGCTCTGGGATTTCATTGGCCAATGGCCACAACAG	A // G	0.64
Affx-961055061	2	35348876	Subspecies	CCATCTATAACCTCTAAGACATGATGGCAGTGAGA[C/T]GAGAAGAGAAAAGAGGGAGAGACAGGAAGGATAAT	T // C	0.672
Affx-961055062	2	35351769	Subspecies	CTCCCCAAATCCTCCTTGACTGGTGTCCAAAATAG[A/G]CTAGACCTTTACTTGTAATAGAAGTCTTTTACCCC	A // G	0.732
Affx-961055069	2	35607546	Subspecies	CACCCCCAACCTATTGAGCTAGAATCTGTATTTTA[C/T]AGCAGGATCCTCAAATGATTTACATGTACATGGAA	T // C	0.654
Affx-961193838	2	35619253	Parentage	AAGTAACCTGGGTGGAGGGTATGTGAAAACTTTCT[G/T]TACTATATTTGCAACTATCCTGAAAATAAAAAAAC	T // G	0.736
Affx-961055072	2	35666194	Subspecies	TTTGATGACAAGAGGGACTGAATAAGAGGCCACAG[C/T]AATGAAAATTAATATTTACTGCTGGAAAACAAAAC	T // C	0.632
Affx-961055076	2	35709460	Subspecies	TACTTTTAAAAAATTCTGCTTCCCTGCATATTTTA[C/G]TTTCCTATGGAGGGCCTAGAAATACTGGCTCTTCA	C // G	0.66
Affx-961055079	2	35721369	Subspecies	GGAGACAAGAGAAATAAAATTGGGAGTCACTGGGG[C/T]ACAGGTGGCACTTAAAGCCATTAGACTAAAAGGAG	T // C	0.656
Affx-961055081	2	35726126	Subspecies	AATTAGTCAAAGAAATTTTGACACATACAATTGAA[A/G]AAGAGAAAGTATAATTTACTTAGCCTTACAAATAC	A // G	0.676
Affx-961055082	2	35728386	Subspecies	TATTGCCCGCTATCTTCCAGCCAATCTAGTCTTAG[G/T]AATTTGGGATACTGATGATTAAAGACTATCCTTGT	T // G	0.742
Affx-961055083	2	35735702	Subspecies	CTTCCCTTTCAATGACAGGAGTGAGCGCAAAGCTC[A/G]TCAGCATAACTTAAATGACAGATCCATGAAGCCCA	A // G	0.678
Affx-961055084	2	35736451	Subspecies	AAAAGAATTTGTCTACACTTGTTCTGTGTAATTCC[A/G]TATTTCCTATTCTGGCTTAAACCCATTCTAACCAA	A // G	0.674
Affx-961055086	2	35737173	Subspecies	TTCTCTCCAAAACTATAGACCCAGACATCTAACTG[A/C]CAATTTGCCAACTCCACTAGAATGTTTAATAGGCA	A // C	0.728
Affx-961055088	2	35737618	Subspecies	CACATGTCAGAAGAACACAGGTCCTGGCTTGAAAA[A/G]GCTCCCACTGGTGAAATCTGATATACTTTGAGCAT	A // G	0.616
Affx-961055089	2	35737966	Subspecies	ATCAAGGAAAAGGATTCCCCCTGGGGCCTGCCGAT[A/G]CTCTGAAGACTGATTTTAAGACCTTAAAACTTCTA	A // G	0.682
Affx-961055090	2	35739269	Subspecies	TACTGAAATTTATTACGTTCATCAAATGAAACAAT[A/G]AAGGATTTTGATCTGTTGGTTCATCTTTCTCTTTA	A // G	0.718
Affx-961055092	2	35742270	Subspecies	AAACTCATAGGAATATGAACCCCCTTAGTTTCATC[A/G]AAGAACGGAAAGTGAGGAGGGTCAACCTCAGGGAG	A // G	0.666
Affx-961055093	2	35745159	Subspecies	AGTTGATCTTCTGCTAATATCAAGTAGAGCACATG[A/G]TATTTGCTGATAAAGTCAGATTTTCTTGGGTTTTT	A // G	0.712
Affx-961055096	2	35764161	Subspecies	CAGGTAGTTAATTACCCTTCTTACATGAAAACATG[A/G]ACGTGTAATAAAATAAGTCCTCATTGCTACTGGGT	A // G	0.698
Affx-961055097	2	35767219	Subspecies	GGTTTATCCTATTATAATTTGTTTAGAATTAACTA[C/T]TTAATTAATTAATATAATTATTTAATCATGATGGA	T // C	0.642
Affx-961055099	2	35774673	Subspecies	GACAAATTTCTCCAAAGAATTTATAAAAATGGCCC[A/C]AAATAAGCAGACAAAAGATGACTAATCATTAGAGA	A // C	0.624
Affx-961055100	2	35775679	Subspecies	ATCTTACCAAAATAAAAATAAACTTTTTAAAGAGA[A/G]AAAGAAGCTACAGATAAGGTTGGGAACATACAAAA	A // G	0.612
Affx-961055101	2	35776511	Subspecies	CCTTTAATTCCTTACACAGATGTGTTTATATAAGA[A/C]TTATGTGTGCAACTGAGACAGTCTCAGAGAAAGGC	A // C	0.686
Affx-961055102	2	35778197	Subspecies	TCAGCCTACCTTCACACTTGGCTTCAACAAACAAG[A/G]TATATTTGTCCTGTAAAGCAAGAACCTACAGGTTT	A // G	0.694
Affx-961055103	2	35782352	Subspecies	AGCAAATGGGGAATCTAACACTAATTTCACTGGTT[C/T]ATTAACAATAGTAAAGCATCTCATAGCCAGTATAT	T // C	0.68
Affx-961193847	2	35783185	Parentage	TTTGTCAAGTAATTTTCTAATAATAATACTTTTTT[A/G]TTACTTATAATGCCATGACCAGCGTGGTTCATGTC	A // G	0.79
Affx-961055104	2	35784004	Subspecies	TTTTTGTTCTAGACATTTCTGCCTGGGAGAGCTGC[A/G]TTGATGTTGATGTGGGTTGAAGTTTTGGCCCGAAG	A // G	0.648
Affx-961055105	2	35784277	Subspecies	AGGATCACACTTAGACCCTAGGACAGCACTAAGTC[C/T]AGAGCTCTTTGTCTCTGCTTGCAGCCCATCTCTTT	T // C	0.64
Affx-961055106	2	35784839	Subspecies	GCACAACACGTTGAGATAATTCAGAAGAAAACAGC[A/G]ATGATAAATAAAACTTACCAATTTACCAAAACCAA	A // G	0.672
Affx-961193848	2	35785729	Parentage	TAAATTATCCAAGTCTGATCTCACCTCTGGACATT[C/T]TTACCTGATACCCAGTGTTCCACTCCAACACAGTA	T // C	0.738
Affx-961055107	2	35786741	Subspecies	TTTTCATAACTTCTTTCATAGACATCATTTGTTCA[C/T]CTTTCATGCATGTCTAAAAGATTTAAGAACATTAA	T // C	0.728
Affx-961055109	2	35803400	Subspecies	CAAAATCAGTTATGTAATGGCCAAAAAAAAGAGGT[C/T]TCTAGCAAAAATCCTAAAAGTAGATATTTTAAGGC	T // C	0.766
Affx-961055110	2	35812590	Subspecies	AATATTAAACATCTCCCAGGGCTAGAAGAGGGAGT[A/G]AAGAAGTCTTACTCCTCTGGGCAGTGCCCTGAGGG	A // G	0.62
Affx-961055113	2	35891128	Subspecies	AAAATATGCATATATATGTATATATAAATACACTG[C/T]TGATGATTTAAATGTACCAAGCTAACTGCCAAAAG	T // C	0.682
Affx-961055114	2	35927714	Subspecies	GAGCAAGAGATTTGAACAGACACACCAAAGAGTGG[C/T]CCATAAATAATAAAAAACATGCTTAACATTATTAA	T // C	0.656
Affx-961055116	2	35964139	Subspecies	CTTTGTTGAATTCTTTAATTTTTCCTTAGTTGTAA[C/T]CACATGAATATTGTATCAGTCTGTTTCTTTAGGAA	T // C	0.602
Affx-961055119	2	36030056	Subspecies	AATCGGTGCCAGTGCTTTGAACTGAGGATTTAATC[A/G]TCTAAAAGCATTGCTTCTTCATACACAAAACCATC	A // G	0.742
Affx-961055120	2	36031113	Subspecies	CAAAATAGAATCTCTAAAACTTATTTAGACAATCC[A/G]GCATATGTACACTTTTTAGAAGAATTTGAAACATA	A // G	0.702
Affx-961055121	2	36033387	Subspecies	TTGGCTCTCTAAATGTGGACTCCTTTATTTAGGGT[A/G]ATTACTGAAGTGCTAGTCATGGGTGAACTCATATA	A // G	0.718
Affx-961055123	2	36033603	Subspecies	GGGGCGGAAGCTAGATCACAGTGGTCTGTAGCTAG[A/G]AGGGAAAGAGAAGGTATAAACATCCACTGATGGGT	A // G	0.63
Affx-961055124	2	36074987	Subspecies	TTGAGAAACGCTGCAGAGCACTGTTTTGTAACCCA[C/T]AAGCGGCAATATTAGTGGGGTCTGAACTCAATTTA	T // C	0.69
Affx-961055126	2	36125090	Subspecies	TGCACTTGAAGACGGGTCTCTCTCTCGGCAGCTCC[A/G]TCTGCTTTCCAATGTAACGTCATCTTCCTTCTCAT	A // G	0.692
Affx-961055127	2	36125511	Subspecies	CAGTACGGTGGCTTCTGGCTGAAATATGGTCATAA[A/G]GTAGGGTCAGTGACCCTTTGTGTGCTGTGTGCTCT	A // G	0.7
Affx-961055128	2	36126939	Subspecies	TTCATAGGCTTTGGATGGTGAAGGGCCTACTGGAG[A/G]CATGCTGTAAATATGTGTGGCTTGATTTCTTAGTC	A // G	0.724
Affx-961055129	2	36127742	Subspecies	TCCACAGTCACAAGGAAGTTTTGGCTCTTGTTCAT[A/T]AATCCATTCCCACCAAACAGATACATGTAGTTACT	A // T	0.62
Affx-961055131	2	36130464	Subspecies	AGTATTTTAATCTACTTTCCCGTGTCTTCAAATTA[C/T]AACAAATATGCATTTCTTTTGTAATTATGGTAAAT	T // C	0.758
Affx-961055132	2	36130517	Subspecies	TTTGTAATTATGGTAAATTATCAAAAAGGTAAAAT[G/T]TACGAGTGACTAAATGATGGGAGACAGAGGAGAAA	T // G	0.724
Affx-961055133	2	36135578	Subspecies	TAAAGTACTGCACAGATACTTCCATTTCCTAAAAC[C/T]TTTAAGTCTTTTTAGTCCTCAGCAGCAATCACAAG	T // C	0.686
Affx-961055135	2	36137730	Subspecies	CACTGACCAAATTGTAATCGGGAGGGGAGGTCATA[C/T]GCCCCTTTGAAATATGCTGCTGCATTAATTTGATG	T // C	0.628
Affx-961055136	2	36140866	Subspecies	TGTATATTTTGACCCTAGTTCCTTCCTGTCTAAAT[C/T]ACTGTAGCTTTATAATATCTATAAATAAATGATAG	T // C	0.728
Affx-961055137	2	36160091	Subspecies	AATATAGAATATTAAAATATTTATGTTGGAGTGAT[A/G]GGAAAATATTGTGTTTTTGGTTTCTCTTTAACCTG	A // G	0.668
Affx-961055138	2	36162122	Subspecies	CTTTCTCTGCTAATGGAGAAAAAATGGTGCATTTG[C/T]GTTGTTCCCTTTGAAGGGAACTTTTTTTTCTTTTT	T // C	0.654
Affx-961055142	2	36338672	Subspecies	TCTTCACTCATCTATTTTCCAGAGAAACTTTCAGC[A/G]GACAAGAGCCGCATCCATGAGAACGGCAATGAATG	A // G	0.706
Affx-961055146	2	36367370	Subspecies	ATGAGATCACGCGCTGGCAGGGGAGACTTAAGATA[C/G]CCTATGAAGACCAGTCAGGAGAAGGAAATGGCAAC	C // G	0.622
Affx-961055150	2	36470868	Subspecies	CTAGGGACTTCTTTTGTGGTCCAGCGAGTAAGACT[C/G]GACACTCCCAATACAAGAGGCCCTGGTTTCATCCC	C // G	0.6
Affx-961055152	2	36477771	Subspecies	CATTTCTTAGGTCAGTCCAGAAGTTCTGGATGAGG[A/G]ACTAAACATGTAGAGGTCATACCACTCATTTTTGT	A // G	0.69
Affx-961055155	2	36559667	Subspecies	TTATGATAATGCTACATAGCTATTTCCTCTTAAAC[A/G]TCAGTAGAATGTTTATATAAAATGAAACATTTAAA	A // G	0.806
Affx-961055156	2	36562765	Subspecies	ATGCTGTGGTGGAAATGTGAGCATCACTCTCTCTA[C/T]GGGGCTGCCCAGTACCAGTTGGCTCTGAGGGATGG	T // C	0.668
Affx-961055158	2	36565383	Subspecies	CAACAAAGTGAAGTTCAAGGTAACCCAGCTTGTTA[C/T]GGCAAAAACCAGGATGACATTCCCCAGATATAGCT	T // C	0.682
Affx-961055159	2	36568210	Subspecies	GCTATTGCCAGGAGCAGTCAGGAAAATTGCTAGTG[A/G]CCTTAATAGAACAGTTTCAAAATTAAGAACTATTT	A // G	0.708
Affx-961055161	2	36568788	Subspecies	TTCAGATTCAGCTCTGGAGCCCTTGCCTCAAACAA[C/T]TACATTATCCTGCCTTATTCAGTAGCGAGTCTGAT	T // C	0.722
Affx-961055162	2	36571828	Subspecies	AAAGGATCTGAAAAAAGGTGAACATTAAACACTTT[A/G]AACATTGAACAGTAGAGAATTTGAGGAGAGTGGAG	A // G	0.67
Affx-961055163	2	36574736	Subspecies	TTTACTAATAAAAGGGGCCTACCAGTGGGGGATTC[A/G]GTTTGCTCATATTCACTAGATTTTGTTTGGGAGTC	A // G	0.654
Affx-961055165	2	36575671	Subspecies	TCAGCATAGTCACAATTTTAAAATCTTATGATTCT[A/C]GTGAGGAATAAGGCATGAGTCATCATCAATACAGA	A // C	0.64
Affx-961055166	2	36579633	Subspecies	AGAAAAGTTTGAGAAGTGTTCAAAAGAATGGAGGA[A/G]AGAAATATCCTTATTGTCTTGCTTGGGGCCCACCA	A // G	0.74
Affx-961055167	2	36580254	Subspecies	CAGAATCTTAAAGTTAATTGAGTTATTTTACAAGT[A/G]TGAGAAGGTGAACCTGGTTTTATCCTTTAGTAAAA	A // G	0.692
Affx-961055168	2	36581172	Subspecies	GCTGGTCAATGAAAGTGATTCCTGGGATAAGGCGC[A/G]TACGACATGCCAAACCTTCAGCAGTGACCTCATCA	A // G	0.65
Affx-961055171	2	36589855	Subspecies	TGAAGACCCCTGTCCTGAAGGCTGGCACAGTTCCC[C/T]CTCAGGTCTTTCTTGTTATAAGGTAAGGTAATATT	T // C	0.676
Affx-961055172	2	36598925	Subspecies	TAAATGTAAAATTCTTTGACTTCATTTTCTAATTG[A/G]AGCATATCTGAGAATAGTTAATCAAATAACTAGCA	A // G	0.688
Affx-961193898	2	36631877	Parentage	AACTTCTAGTTTTCCACTATTCTATGAGACCAAAT[G/T]TAAGATCAAAATGTTTGAAAACTTCTCAACCTATT	T // G	0.754
Affx-961055175	2	36654912	Subspecies	CTGCTTCAAATATCTATATGTAAGTTTTTGTGAAT[A/G]TGTAACATTTCAACCAAGGATAAACACCAAGGAGC	A // G	0.792
Affx-961055176	2	36657021	Subspecies	GAGAGAACAGGCGAGGCTTGGATTCCACTTAAGAC[G/T]TGTGATTTAAAAATCTTTTAAGTCTAGTCTGCTGT	T // G	0.626
Affx-961055178	2	36673058	Subspecies	CTTGCCTTGCACACAGATTCTTTACCAGGGAAGCC[A/G]CGTAGGTGATTCTAGTGCACACTATATTTGTGCTT	A // G	0.618
Affx-961055179	2	36674336	Subspecies	ATTACTAACCCTAGGTGAATGAAATAAAAGGTATG[A/G]TTCAGTTTATCATATTATCATTTTACTTTTCTCAT	A // G	0.712
Affx-961055180	2	36693655	Subspecies	AATTAATACCATCATACTTCACAACCTATTTTTCT[G/T]TCACCCAACTATCATCATCAGACCATCACTGCCAC	T // G	0.72
Affx-961055183	2	36770364	Subspecies	CAAATTCTAGAAGCAATAGTTGCGTTTAATACTTT[A/T]GTCATTTAACCTTTATCTAAATTAGTTGACATATC	A // T	0.704
Affx-961055187	2	36801898	Subspecies	AATATTTACTCATTTCACTGACTGCTCCTTAATTT[A/G]TTTTTGTGGTTTTTCCCTCGTGTTTCCAACTTCAA	A // G	0.676
Affx-961055189	2	36842944	Subspecies	AGTAATCCCATAACAACTGGTCTCATTATGATGTA[G/T]GACTGATTATTTTCAAAGGTGCAACAAGAGTGTTA	T // G	0.694
Affx-961055191	2	36866091	Subspecies	CTGAATCATTTGAGTGGTGACCCTTTAACCCTAAT[A/G]CTTCAGTGTTTAATCCTTAAGAATAAGGATAAAGT	A // G	0.72
Affx-961055192	2	36871386	Subspecies	TAATAGTATTTTAATATTTTGTTTGACTTGATTTA[C/T]TAGTTTATTTAGAATTTTGCAACTAAAATTGGTTT	T // C	0.644
Affx-961055199	2	36970534	Subspecies	ATGATACATCCTGTATATAATAAAACAATTATAAA[C/T]CTGTACTTAGAATTGGACTCTAGGCTGGCAGTTTA	T // C	0.6
Affx-961055200	2	36974986	Subspecies	CTTATATTAGTTTTGATATTGTTATTCTGAGGCTA[G/T]TGCTTATATGTCATAAATTAAATGAGTTGCATGCT	T // G	0.686
Affx-961055203	2	36997390	Subspecies	AAATGTACAATAAAATATTATTAAGAGTAGTCACT[A/G]TACAGTCCATTACATCCTATCACATATTTGTTTTA	A // G	0.698
Affx-961193982	2	36999461	Parentage	GATGGCTATATGTAAAATAATGAATGCCTTTGATA[C/T]GCTGTGTTCAAAAATAGTGATACCACAATTGGCAT	T // C	0.748
Affx-961055204	2	37006496	Subspecies	GCACCTTTAGTTGACAAGCCTGTTGTTTCATTTTC[C/T]ACTGTTTTCTGTAGTTAAAGCTGTGAAGTTTAGAC	T // C	0.72
Affx-961055205	2	37006842	Subspecies	ATCCAAACATCATATTTCCCATATAATGATGGTTA[A/G]GTGATTGGTTAAGCAAGGCAAGTGAGACTAATCAA	A // G	0.724
Affx-961055221	2	37479937	Parentage	TTAGTTATTCACATCCACTTTCTTGTAAATCTTCA[C/T]TGGAATAGATTTCAAATTCTTAAGTTTCAAACCAC	T // C	0.7
Affx-961194205	2	38138626	Parentage	TTAATACGATAAAGATTTTTGCATTTACTTCTTAC[A/G]TTGGGATAATTAGTATGCATTTCTGTATGATGTGT	A // G	0.732
Affx-961194206	2	38145929	Parentage	TTATGATTTTCATTTGCATTTAGAATAAAGATGTC[A/G]AGCAGCTTTTCTTATGCATATTGGCAATTTGAATA	A // G	0.76
Affx-961194207	2	38154580	Parentage	ATGAACCTGGAGATAGAGCAATAGATCTTCAAACT[A/G]AAATATATGAAGATAAAAATAATAAAAAGCAGAAT	A // G	0.756
Affx-961055253	2	38590293	Parentage	CTCTATTGTATGGATATAGCACAATTTCTTTTTTT[C/T]ATTCTGCTGTTGATTGCCATATGTGTGATTTTTAG	T // C	0.742
Affx-961055260	2	38756941	Subspecies	GTGGCAATCAGAAGTACAATTTCCTAGGGTGCAAA[C/T]GAGGAGAGTGCTTTGTGAAGGGATTTGAAGGATAA	T // C	0.66
Affx-961055262	2	38799213	Subspecies	AGGTACAAATATTTTGCTTACCAGTTCTGGACGGA[A/C]GACTGATGTTGATTTATGCAGCCATCTTAGCCCTT	A // C	0.706
Affx-961055263	2	38805444	Subspecies	TCCTCAAAGGAAGCTCTATTCACAATTTAAAGTGC[A/C]AGATTTGGGAGGAGACAATTGGCTTCCCAGGTGGC	A // C	0.702
Affx-961055268	2	39014602	Subspecies	ATTGCTATTAGTAATTAATGGAGCTTATTCAAGGG[A/T]CAAATGAAATAATATCTATAAACTGCACATAATAA	A // T	0.696
Affx-961055269	2	39021935	Subspecies	AACTTTCAAATGATTGACTTAATTCAGAGTAAGTA[A/C]TCTGACCACTTAGTCAAGTGAAATTGACTAAAAAG	A // C	0.75
Affx-961055271	2	39039818	Subspecies	TCATCTATTCAGGTGGTTTCATTGACTGTGAAAGC[A/G]TGCTTCAAAGGCCTGATCAGTCAATGACAACTGTC	A // G	0.712
Affx-961055272	2	39046469	Subspecies	ACTAGCAAAATGAGAGAGATGGATCCTCCTTGAAG[C/T]GAGAGTAAGCAACAATGACCAAAAGAGCTATGTTA	T // C	0.642
Affx-961194319	2	39069744	Parentage	TAGCCAAGCTGAAAATTAATTCCAGGGATTAATTA[C/T]ATTTTTCAGATATTTAGGTTCTCAAAACTTTTACT	T // C	0.784
Affx-961194320	2	39077669	Parentage	TAATATTAACTTTAAATTTATCTATATTCATTTTT[A/C]TACTGTTGTGTCTAAGCTGATTACAGTCTTTATAT	A // C	0.758
Affx-961055278	2	39122595	Subspecies	CCACAGATTTACATCTCCTGTAAGAGGTTGGATTT[A/T]ACAAAATCATGGTGCTTGGCAGCATATTTTACAAA	A // T	0.684
Affx-961055279	2	39122753	Subspecies	TAATAGTTGTCCCAGTAATTGATTAATTTCTGCTC[G/T]CAATTGATTTTGTTTTCCTTTCAGAATTGATTACT	T // G	0.656
Affx-961055280	2	39123693	Subspecies	TACAATTTTATTTTCAATTTAGCTTCATATCATTA[A/G]GATTTATGTTTGAAGTTATTTTAAAGTTACATATA	A // G	0.648
Affx-961055281	2	39128217	Subspecies	TTTTCCTCCTGAACTATCCAAACTTCCTAACCGAT[C/T]ATTTAGCTGTTTCAAGCTAGAACAGCTGTTCTTTC	T // C	0.764
Affx-961055282	2	39128410	Subspecies	ATACCATTACCTGAAAACTCTACTCATTCCAGCTC[C/T]CTCTCCTCTACACTTCTCCAAATTCCCAGGCTTTA	T // C	0.684
Affx-961055283	2	39128547	Subspecies	TACTCCTTCAGACATGAGCTTAAGCATCAAATTCT[C/T]ACCCAAATCTTTCCTAACTAATCTCTCTTGCACCC	T // C	0.716
Affx-961055284	2	39131915	Subspecies	CATACAAATGTCATATATATTTATATGTTGTAAAT[A/G]AGGGCTTATCAAAGGGAAAATCAAAGCCTATCAAA	A // G	0.606
Affx-961055286	2	39133881	Subspecies	ATTCCCCTCAAACTGTCCCTGAGCTGTTTCTAAGC[A/G]TTCCCAGAATACTGCTTTTCCAACATCTATGGCCA	A // G	0.73
Affx-961055287	2	39137364	Subspecies	TTATTTCTTATTTCATCTTTGCTTCTATGTAAAGG[A/G]CTTCAGAAAATTATTTGAAGATTATGTCACTATTT	A // G	0.662
Affx-961055290	2	39145010	Subspecies	ATATTTTCTCTGAAAATATTTCTACATATTTAAAA[C/T]AGGAATAATAACAGTACTAAACATTTTGGATTGTG	T // C	0.606
Affx-961055291	2	39151899	Subspecies	CTAATGTTCCATCTCCTGTCCAATAAGTGACACTG[C/T]TCTCCTCAACAACTGCAACAACAAACAATGTCCCC	T // C	0.694
Affx-961194340	2	39187032	Parentage	CTGCCTCTGGTAATGTTTTCTGTTTTAATTTTTAA[C/T]TTGTCTGATACAAATACATCGTTACTAGCTTGCAT	T // C	0.758
Affx-961055295	2	39331880	Subspecies	TAGTCAGAATTTTGTTTCTTAGAATTGCTAATGTA[A/G]CTAATCACATTGGGCACTGCTGGGAACCTCTAGTC	A // G	0.736
Affx-961055297	2	39347062	Subspecies	AGAAATACTTCTCTTGCATAATCATACTTTATCAC[A/G]CCTAAAAGTTACTGATTATTCTTTAATATCATTTA	A // G	0.764
Affx-961055299	2	39351683	Subspecies	ATATAGTTTGTATCTTCTTCATTTGTGGTTTTTTA[A/C]TGTTAATCTGTTTTCATTTTTGGCGGTCATATTAA	A // C	0.694
Affx-961055308	2	39558950	Subspecies	CAAAAAAGCAAGAATCCAAAACTCTATGTATTTTA[C/T]ACAAAGATAGTTTTATGCAATGCCATCTCTCTTCT	T // C	0.716
Affx-961055312	2	39620180	Subspecies	GCTTAAGTTGCTCCTAAAAATGTATTGCTATGTCG[G/T]GTGCAGGCTTCTTAACACACGATTCAGACTGATTC	T // G	0.696
Affx-961055313	2	39620872	Subspecies	CAGCTGTGAGTTTCAGCAGCCAATCACTCCTAGTG[G/T]TGAGGACATGAGTGCCCGGGTCTGATGCAGGGAGA	T // G	0.62
Affx-961055314	2	39621925	Subspecies	TTAATTCATAGATTGATGGCTAAAGTTCTCCTAGG[A/G]TTCTAAAGGATGCTATTTATTATTTATTCCATCTC	A // G	0.688
Affx-961055315	2	39622820	Subspecies	AAACTTCAAAAATGACCTCCAACATACATACTTTG[C/T]TCAAGATGTGGGAATCACTTCCTGAATTTTAACTG	T // C	0.742
Affx-961055316	2	39624298	Subspecies	TTGGTGCAGTCATAAAATAGTTGAGATTTGAAGAT[A/G]AGTTTATATACCAGAGATGAGACACTTAAGAGAAA	A // G	0.754
Affx-961055317	2	39624873	Subspecies	TACAGTGAAGCTTTATTCCAAGAGCATCAAATTCT[A/G]TAGTAAAAATGTCATACTTTACAAAACTGATCCAA	A // G	0.71
Affx-961055318	2	39625558	Subspecies	TGGGTGTTGTGATCACCTCTCAGAAGCAGGATGGA[C/T]TCATATGCTCACAATCTGGTTCACATGTTGAGACT	T // C	0.686
Affx-961055319	2	39625921	Subspecies	CAAGCACCAAAACTTCCTCACTCTTAAAAAAAAAA[A/G]TCAGTCACCCTTTATTACTCAACACTGCATAAAAT	A // G	0.666
Affx-961055321	2	39635356	Subspecies	TGCCAACTAATAATACATTAGGAGGGTAATGAAAC[A/G]AGCTAGATGTCATAATGACCCAGTATACTAATTAA	A // G	0.772
Affx-961055323	2	39640289	Subspecies	AGCCCACTAGTTAAAACCTCGTATTAATGCTCTGA[C/G]TTGAGGATGTGAAAGAACTGAGTTTGCTATGCATG	C // G	0.714
Affx-961055324	2	39644376	Subspecies	AACATGCAAAATTTAAAAGCAATTCCAGTTTAAAA[G/T]AAATCAGGCTATGGAGAGTAGTCTGTAGCAAAATA	T // G	0.664
Affx-961055325	2	39644562	Subspecies	TAGTGGAACTTCTCTAGCCTAAGATAGTCAAGAAG[A/G]GCCTGCTCACTTACCACCCCTTCAACCCAAACACT	A // G	0.642
Affx-961055326	2	39644604	Subspecies	TCACTTACCACCCCTTCAACCCAAACACTGAAGCA[C/G]TGCTAGAGAACTGGATGGATTCTCTCTCCACAGCA	C // G	0.628
Affx-961055327	2	39645717	Subspecies	TTCTATATTTCATTTTCTAATCATTTGCTTCTTTT[A/G]TATGTGTGTTGTTAATCTAATATCTAGGATAAGTT	A // G	0.74
Affx-961055328	2	39645757	Subspecies	TGTGTTGTTAATCTAATATCTAGGATAAGTTATTT[C/T]GTTCATACAGATTAAGTTGCTACCAGTACTAGATA	T // C	0.792
Affx-961055329	2	39645893	Subspecies	TGGAGCACCAAAATCCTATACAGTAATTCCCTTAC[A/G]TACAAACCATCAAGTTGCAAACTCTCAAAGATACA	A // G	0.736
Affx-961055330	2	39645931	Subspecies	CAAACCATCAAGTTGCAAACTCTCAAAGATACAAA[C/T]GTGTGTTCATCAGCATTAGGGATAAGTGAAATTGC	T // C	0.624
Affx-961055332	2	39646867	Subspecies	TTGAGTTCAAAATTTTTTTTTAGCCAGCCAAGCCC[A/G]AGGGTTATCTCCTACTAGCTTCTTTGCTAGCCTAG	A // G	0.644
Affx-961055333	2	39646958	Subspecies	GAGCCTTATTCATCTGTTTTGAAAACACTTGGTCT[A/G]GGGAGAAAACCCACTTTCTATTTATTTGACTTGAT	A // G	0.648
Affx-961055334	2	39647778	Subspecies	TATGCCCAATAAGTCACAGATGTTCTTTAGTTTTT[C/T]TGTGCATTGATTTTGCTGTATGTTATTTGGGCAAT	T // C	0.754
Affx-961055335	2	39652275	Subspecies	AAAAGTTTTATTGTGGGAAATCAACTAATAAATTT[C/T]TCTCAACATATGCAAGACAATTGTCAACTCTACTT	T // C	0.768
Affx-961055343	2	39699019	Subspecies	TTGTATTATTTAGATATTAATTCCTTGTCTATCAC[A/G]TCATCCACAAATATTTTCTTCCATTATGTAGGTTG	A // G	0.696
Affx-961055344	2	39699969	Subspecies	TTCTGCCACCTGAATGCTTAACCTCAGCCACTTGC[A/G]TTCTTTGGACAAGGCAATTTTAAGCACATGTTGAA	A // G	0.682
Affx-961055346	2	39750336	Subspecies	AGCACACAACCATGCATAATTATGAAGCATAGATG[C/T]ATTAAAATGTACACATAATTTGTGTTCTTATGGCA	T // C	0.728
Affx-961055348	2	39760537	Subspecies	TTATATACATTATTTAAAGAATTCGGCACTCTTCC[C/T]CTTTTGTTATACTAGCAAATCACAGAATGTACTTT	T // C	0.668
Affx-961055350	2	39801315	Subspecies	CTGGGGGAATGCAGGTAGTGCACTGCATTCCTCTG[G/T]GTTTCAGCATCCTATAAACAAAGAGGAGCTAGGTG	T // G	0.684
Affx-961194406	2	39808177	Parentage	CTGTTCAGAAGACTATAAAATAAATTAGATAACTG[C/T]ATTCTATTATCTAATTTGAAAATGTTCACTTTAAG	T // C	0.73
Affx-961055352	2	39818143	Subspecies	TGACCATTTTCTCATCAAAGCCTTATTCTTCTGAA[C/T]AGACAGTAAATTACCACACTGGTAATACTTTTTCA	T // C	0.71
Affx-961055360	2	40036391	Subspecies	TTTTACTGAAAACTTAGGGGTAAAAATCAAAGGTA[A/T]TACCTATTGTTAAAAAATCATGCTTGTAGCCTCCC	A // T	0.714
Affx-961055365	2	40108500	Subspecies	CCACATCGTTCTACTAAACTGCACATAAACTGTGT[C/T]GCCATATTTTCTTTGCATATTTTGCTTTTGAAATT	T // C	0.688
Affx-961055366	2	40123648	Subspecies	TCTTGTAAAACATTCCAAAGCAATGCATTAAAAAA[C/T]TGCTCAAAAATGCCATATTATTTTATTATTAAACT	T // C	0.684
Affx-961055367	2	40127950	Subspecies	ATGAGGGAAAACCAAGAGAATTTGTTGCAAGAAGA[A/G]CTACCATAAAATAATGGCTGAAAGCAGTTTTATAA	A // G	0.666
Affx-961055368	2	40129358	Subspecies	TGGGGCCAATTATTCTTTAAAAATGATATTATCCA[C/T]AAAGCATTTTTAGTTTGAGTAAAGTATACAATGAC	T // C	0.716
Affx-961055369	2	40135515	Subspecies	AGTAATGCTTTTGACTTCATGTACTTACTTTCATT[C/T]ACTACTTTGACAGATATTACCTATGTATTCAATAA	T // C	0.702
Affx-961055371	2	40139592	Subspecies	ACATGCAAATTTGCTTTCTCCCATGACAAAATTAC[A/G]CAAGAACCGGACATAAACTAATCCTCAATTTCCCT	A // G	0.71
Affx-961055372	2	40139960	Subspecies	AAGTAAATATATTTTGAAATGGATGCATTCTACTA[C/T]GAGATATATTCATTGTGGATTGGAAGTACTTATTT	T // C	0.712
Affx-961055374	2	40143988	Subspecies	CTAGGGTGATGATCTTGCTGGCCAGTTTTCACAAA[G/T]ATTTGCATTTTGATCTGTGAGCAAATGTGAAGATA	T // G	0.676
Affx-961055375	2	40147655	Subspecies	CTGGCTAAAGTGATTTCATTGTACATTTCCAAGAT[A/G]GATATCAAATCATACATGCTCATATAGTCGTATGC	A // G	0.708
Affx-961055376	2	40147779	Subspecies	GCAATTTGTGTGCTCTAGAAGCTTACTTCCTAGAT[C/T]TGCTCTTTCATCTGGAACTAAGATTCTTATTAAGA	T // C	0.69
Affx-961055377	2	40149723	Subspecies	AGTTTCTATATGCAACCATTTGCTAAGTTCTCAGT[A/G]GTTTCACTGCCTCTCTCCCATCATCTTCTTCAACT	A // G	0.668
Affx-961055378	2	40151563	Subspecies	TATTTCAAGCAGTAGTAGGGTTGAGGACTTAGTCA[C/T]TTAGATTAAATTTTCCTTTGGTGGATTAAGTAACA	T // C	0.708
Affx-961055379	2	40155254	Subspecies	CCATTGTAGCTTATTACAACATATTGACTATAGTT[A/C]CTTGTGTTATATGGTAAATTCTTGTTGTTTATCTT	A // C	0.66
Affx-961055380	2	40156766	Subspecies	TCTGTGTGAGATGAGTTCTGATTTTGTGCAAAATT[A/G]CACTAGTTATTCTAAGTTTAATGTTTAAACAGTTA	A // G	0.716
Affx-961055382	2	40160694	Subspecies	GGATAACAAGTTTTGGAAGAAAATAACTTTTTAAA[C/T]TGGAAATTTTGAAGTATGAGTCTACATAGTGCTAA	T // C	0.66
Affx-961194484	2	40456064	Parentage	TTTAGGACTCATACTTTTGGAATGTCTATATTCCT[A/G]TCAAAGGCTAACTGCTTATCCCCACCATCCCCTTG	A // G	0.74
Affx-961055395	2	40584102	Subspecies	ATAAGAAAGCTCTCACATATATAAGCATATAAGCC[C/T]TTCATTTTAGAGTCCATTCTTCCCTTTTCTTAAAA	T // C	0.684
Affx-961055396	2	40588070	Subspecies	AGTTTCTGTACTCTTAATCATGGACACTACTGGAT[C/T]TTCATAAGGTAGGAGTTTTGGGGGCCAGGGCCAAA	T // C	0.64
Affx-961055400	2	40673500	Subspecies	AGGAAAAAACATGAGAAAGAATAAAAGACAATGGC[A/G]CATTGAAGACACAGGAAATCATTGTCACAGAGCAG	A // G	0.622
Affx-961055403	2	40821004	Subspecies	ACAGCTGCTTGTTACTAAACATACTGAACGGAATC[G/T]GATTCCTATGAATTTCTAAAATATTAGAATGTATT	T // G	0.756
Affx-961055404	2	40821767	Subspecies	CACTGTCTTCTTCATTTTAGGCTTAAGCTGCTTAC[C/T]ATTAGCCCCTAGGTACATGATAACTTCTGGACTTG	T // C	0.696
Affx-961055406	2	40825216	Subspecies	GCAAAATTGGGAAGAGAGTGTACCAAGCCTCTATA[C/T]TGTCACCCTGTTATTTAACTTACATGCAGAATACA	T // C	0.702
Affx-961055410	2	40886449	Subspecies	CTTCTGTCTATAATGCTTCTTCACAAAATATCAGC[C/T]TGGTTAACTTATTTTTTAAGTGTCAGATTACATTT	T // C	0.688
Affx-961055412	2	40893404	Subspecies	TTCCCCAGTGGCACCAGTTTATATTATCATGACAC[A/G]TTTGTAAAACTTTTGGATGCAAACATACCTGGGTT	A // G	0.634
Affx-961055413	2	40898973	Subspecies	TATATATATATATAAAGTGATTTATTATGCCAGGC[A/T]CTGTACTAGGTACTAACACAAATCCATTGCAAGAG	A // T	0.778
Affx-961055414	2	40899344	Subspecies	TATATATATTGGGAAAGAACATCAAATCAGAAGGA[C/G]CTTCTTCTAATAAAGAGAATCACCTTTACAAATGG	C // G	0.66
Affx-961055416	2	40901019	Subspecies	CTTTTGGCGAGCATCTCTAAAAAAGTAAATGGATA[C/T]TTTATCACAAACATGATTTCCATTTTTGGTTCTAA	T // C	0.696
Affx-961194536	2	41127629	Parentage	CATTAAAATGGAGATGCACAAATAATGAATATGGA[C/T]AGGACTAAAAGGCTTAAAAAGATATTTAAACACAA	T // C	0.732
Affx-961055428	2	41397861	Subspecies	AGCAAACACCTTGAGCAACTTCAGGTCCCAAAGTA[C/T]CATCCAGGATGGTATCCTTTTATCACTAATTCCTT	T // C	0.708
Affx-961055429	2	41400370	Subspecies	TATACAAAAAACTTTTATTCTTTGAAAGAGCATGA[C/T]TAAAGGATATACTTCAAAAGAAAAAATATTTAAGA	T // C	0.746
Affx-961055430	2	41400622	Subspecies	AAATGATAAAGAGGATTTGACAAAGTGACAGCAAA[C/G]AGGAAGGTAAGTAATGACTTTCACAGGACTGTTGA	C // G	0.714
Affx-961055431	2	41406195	Subspecies	CCACCTGATTTCACCATTTCATCAAAATATATGCC[C/T]CATTATTACTACATTAGTTTTTGAAACACTGAAAG	T // C	0.73
Affx-961055432	2	41410791	Subspecies	TGAGAAAAAAATTTCAACACATTTGTTTAACTGTA[C/T]AGGTCAAATAATTATAAACTTTCTGAGCTTTTTTA	T // C	0.704
Affx-961055435	2	41427778	Subspecies	AAGAAATGGTAGGACTGAGTTTCTTCTAGAGGCTC[C/T]AGGAGAGAATCCATTCTTTGCCTTTTGTAGCCTCT	T // C	0.614
Affx-961055436	2	41428723	Subspecies	TGCTTGGAACCACGTTAACATCAAAAGTACAACAT[C/T]CTTCTGGTACATCTGAAATTCATCGTAGGCTAAAC	T // C	0.766
Affx-961055438	2	41462289	Subspecies	TATTGTCAAGGGTTAATGAAACAAATAGATTGGAA[C/T]ATTGGGACAGACATAAACACATTACTATATATAAA	T // C	0.76
Affx-961055441	2	41469641	Subspecies	ATGTAATCGGGCTTAATAGGGGAGGACTGAGTACA[C/T]ATGCCCAATAAGTATGATTAGCACCTACCGTGGTA	T // C	0.696
Affx-961055442	2	41470630	Subspecies	AGTTCTCAAACTTTAATGTTCTTAATAAGAATCAC[A/G]GGGGAGCCTATTACAAATGCAAATTTCTTGGTTCA	A // G	0.736
Affx-961055444	2	41472567	Subspecies	AACAGTTATATAGTTGTCTGAGTCAGACAATTTCA[C/G]GCAGGAACCAATTATCTCTGGTCTGGCCTATTGTA	C // G	0.658
Affx-961055445	2	41475164	Subspecies	GAAACATCACTAACAGAGAGCAGAAGCCAGTTACC[C/G]GCTCTCTCGGAGCACTTACAACTGCTGAAGCTCTA	C // G	0.604
Affx-961055447	2	41476728	Subspecies	AGAAATTTGCTGTGTGAGCCAAGAAGCAGAGGTTA[C/T]TCATGAAGAGGTGGATGTTCTGTTCCTTGAAGTGA	T // C	0.678
Affx-961055448	2	41480434	Subspecies	TAGCCCAATCTATGAGAGGTATTATGCATGTAATA[C/T]AAAGTTATTATGGAATAAAGAAATTTGATGGCATA	T // C	0.61
Affx-961055449	2	41481946	Subspecies	TGAAAACACTGAGAACTATGGTATATAGTGAGCTG[C/T]CCTCCACAGCAAAATAGAACCAAGACTTTAAAGTT	T // C	0.688
Affx-961055451	2	41486942	Subspecies	CCGAGTATCTATACATGCACACACATATACAAATG[C/T]ATACATGTAAGTATAATGGCTTCTTGACAGTAAGT	T // C	0.618
Affx-961055452	2	41487187	Subspecies	AACTCAGGCATTTTTATTAAAATTTTAAACTGGAT[A/G]TTATGTTAACTTAACACAACTGTGCCATTCATTAG	A // G	0.752
Affx-961055455	2	41568785	Subspecies	CTTTGTACACTAAAGGAAAACTGACTTGAACATAG[A/C]TCAGTAGTGAGTTTAGCTATCTAATTTTTGTCTTT	A // C	0.724
Affx-961055461	2	41851826	Parentage	TGGGAGAAAATATTTACAAATGAAGTGACTGAAAT[C/T]TCTAAAATATACAGTTTATGCAGCTCAATATCCAA	T // C	0.736
Affx-961194590	2	41981233	Parentage	CATCTGGAAAGTTTAAACTACATGATAGATCATTA[C/T]TGGATCTAGGAAAGACTGTGTTTCCTTTCTAATTC	T // C	0.756
Affx-961055466	2	42009088	Subspecies	CATGAATTAAATTTAAATAAAGCAAACAGTTCTAA[C/G]AGATATAACTCAACTAGACTTTTGTCAAAATTTAT	C // G	0.74
Affx-961055468	2	42013753	Subspecies	CTAAGCATATGAGAAAACTGTTTTTAATCTTTTGA[A/G]TATACTTTCTTTCCTTCCTAACTCCCTTCCTTCCA	A // G	0.656
Affx-961055469	2	42014148	Subspecies	ATTAAATTTCACATTATATAAACTCAAAGTAATTC[C/T]TATTCTCAGATTTTGACATTTGCTTACACAACATC	T // C	0.764
Affx-961055470	2	42014426	Subspecies	TTGAATGTGGTTTGAAGAAAAAAACAGTATGTTAT[C/T]CCTCATGATTTCTTAGTTAGAAGGAACATTTATGT	T // C	0.742
Affx-961055472	2	42015601	Subspecies	TAATTATAAATTATTTTAATATGAACTCTAGAAAC[C/G]TATGGAAATGGTTTCTCTATGAAAAGATCTACAAT	C // G	0.686
Affx-961055473	2	42015720	Subspecies	AGTATCTAATAATAGTTACATAAGTATCATAATAG[C/T]TTTACATCTAATTGTCTACAGCTAATTGTTTTACC	T // C	0.786
Affx-961055474	2	42015918	Subspecies	ACATTCAAACTTTCTCTGTAGAAACTAAGAAATCA[A/G]GTGCTAACTTTCACAAGGAATAATTATTGATCTTA	A // G	0.716
Affx-961194597	2	42026697	Parentage	ACTATTCTTTTACTAGAGTAAATAATGAATAATTG[C/T]ATATTGAATGTAATTAAAGGTTTTTGGATAGAAAA	T // C	0.748
Affx-961055476	2	42046934	Subspecies	TTAAAATAATTATAACTACAATCCTTATAAGATTC[C/T]AAATTACTCCCATTTGATAATGACAATCTGAACAT	T // C	0.768
Affx-961194666	2	42623445	Parentage	AGAAGAAGGGAAATCAGAATTGGAATTCCTACTGC[A/G]TGTGCAGATCTTTTGGACTTACTCTGAGGTACTGC	A // G	0.74
Affx-961194671	2	42666611	Parentage	TGGAGGATTGGAAACCCTGTGCACCATTGTTGGAG[A/C]TGTAAAATAACACAGCCTGTATGAAAAACAGTATG	A // C	0.734
Affx-961055491	2	42809109	Subspecies	CAGTTTATTAAATATTTTATGATGTTAAAAGATTG[C/T]TGAGTTTCAGAAAGAAATAGGTAGCACATTAAATG	T // C	0.696
Affx-961055492	2	42810124	Subspecies	ATTGACCATATGAGATAATGTATCTGGGCACTGTT[G/T]TGCAGCAGGAAAAGGGTTACTAAAATCTAAAAAAG	T // G	0.612
Affx-961055493	2	42812210	Subspecies	CTACCTTCAAGACACATTCTGAAACAAAAAATGAC[A/T]TGTCTTCACCTCTACTAGTAGCTAGTCCAAGGCAC	A // T	0.632
Affx-961055495	2	42814214	Subspecies	GATAAAACTGATCATGTACCACTATTTTTATGCAA[A/T]CCAAAATAGAACTGATTAAGGTTTAACATAATAGT	A // T	0.744
Affx-961055499	2	42821607	Subspecies	ATCCCTGTTGTATATCCCCTGTACTGAACCCAGGC[A/C]TTGGCAGGGACAAGTATTCAACTAATGTTTATTGA	A // C	0.728
Affx-961055500	2	42822112	Subspecies	TTTGGAAATACTTTCTTAACAAAAGTACCATCCCA[A/C]GAAATAGTATTTAATCTAGGTGTTGAACTTGATAA	A // C	0.726
Affx-961055501	2	42822964	Subspecies	CTGACTAATTTTTGAGAATTATCTTTTATTTTTGA[A/G]TATCCTTGCTTTTGTTGTGGCTATATGACTTGTTT	A // G	0.658
Affx-961055502	2	42825066	Subspecies	CTTTCTGTTACTAGCAAGATTTTAATGCTGAGTCT[A/G]GAGACACAAAAACTTTAGAGTTAGGCAGAATCAAA	A // G	0.684
Affx-961055507	2	42948494	Subspecies	CTCATTTCATTTCTGAATCATGACTTCTATGACTA[C/T]TTCAAGGTTGTTCCTCACAGCTAGAAGAAGGCAAA	T // C	0.728
Affx-961055509	2	42984990	Subspecies	AGAAAAAATCCAAGGGCACTGAATGGGTCTACAGA[A/C]TCCCATTTGAGATCCTGTGAACTCCCCTTTAGAGA	A // C	0.668
Affx-961055511	2	42997176	Subspecies	ATCTTTCTCTTTTAACACTTAACATATTTCACTCC[G/T]CTGCCTTCTTACTTCCATGAGTTCTGATTAGAAGT	T // G	0.708
Affx-961055512	2	43001000	Subspecies	GAATGCTCTAGATGGGTAGCATATCTACTCATTAG[C/T]TCCCCTTGCCAGAGTCATGAAGGGATAATTCTTAA	T // C	0.654
Affx-961055513	2	43001659	Subspecies	GGGAGCAAGAAAAGGTATATTGGGGATGTATTATA[C/T]CCTATTTCCTAATAAAGTTACTAATATACTAGCCA	T // C	0.742
Affx-961055514	2	43005302	Subspecies	AAATGATGTTGAACAATTTGATATTTATATGCAAA[A/G]TATTTTAAAAATTTGAGCCTTCTTCACTTTATATA	A // G	0.678
Affx-961055515	2	43012921	Subspecies	AGCCAATATTTTATTCTGAGCAGCCAGACTGTACT[A/G]TAATCTAGTTAAGATTATCAGATTAATACTTATAA	A // G	0.666
Affx-961055520	2	43134097	Subspecies	CAGAGGAAATAGGCTAGGAATGTTACACCCTGCCC[C/T]TCCACATGGAAGGAAACATAGGAATGGGGAAGAGG	T // C	0.612
Affx-961055523	2	43221805	Subspecies	GTTTAGGAATAAGCCAAAATCAATAACTGGAGGAT[A/G]TGATAAATGACCATGAAGGAGGACAATCAATTCCC	A // G	0.758
Affx-961055526	2	43234604	Subspecies	TTAATTTCCCTCAAGAAGGCATACATCCTTCTAAA[C/T]GGTGAGAATAACAAAATCCAAACAGGTAATTGCTT	T // C	0.722
Affx-961055527	2	43235566	Subspecies	AGTTCTGAACAGAGTAATGTAAGATATTTACCTTT[A/G]GAAAGGTTGGAAGGATTTGAGAAAAGAAGAAATGC	A // G	0.694
Affx-961194710	2	43237488	Parentage	GGAAATAGAATAAGTTAAAACTATTGAAGAAAGAT[A/G]ACTCTGTAATGGATTCCACAGCAACATATCAAAAT	A // G	0.742
Affx-961055528	2	43243005	Subspecies	CCAAATGTGCCACACTGGTGCAGTGGTATGGGATG[C/T]TAATCATAGAAAAGAATTTGCATGTGTCGAGAGGG	T // C	0.686
Affx-961194714	2	43266399	Parentage	CATCTAGAAAATCTACAAACTATTGGCAATAAGAG[A/G]GTTTAGAAACTTGTTAAAAATAAGATCAATATATG	A // G	0.752
Affx-961055530	2	43351629	Subspecies	TTCCACAGTCTCACAGTACAGGTGAAATAAAAATT[A/G]GAGTTCAGGATCTCCCAAGTAGAACAGCCTTGCAT	A // G	0.732
Affx-961055531	2	43374120	Subspecies	AGTATTCTCCACCTAGGTTGTTGCCCTTCTAGGGT[A/G]CAGGGTTGTACTGTTTTTCTGTTGCTAAGTTGTGT	A // G	0.636
Affx-961055534	2	43404014	Subspecies	GCCATTGGAACTGAGGTATCTGATAATCTGGAAAG[A/G]GAGTATAAAGATATTCCCATTAAGATGCTTCAGGC	A // G	0.706
Affx-961055535	2	43404069	Subspecies	TTAAGATGCTTCAGGCCAGGTAATGAGAATGACAG[A/G]GATGGGTGATGCAGTAAATCAATAAGAATAGTAGG	A // G	0.734
Affx-961055536	2	43405518	Subspecies	AAAGTGTTACTATAAATTTGAAAAATCACATATTA[A/G]AGCAACCCACCAGCATCTTCTTTGATCACATAAAA	A // G	0.616
Affx-961055537	2	43408019	Subspecies	AAGAAGGCATCCCAGAAGTCACAGAAGGTGTGGAC[A/G]GCAAGCAACTTCTAAGCACAAGTCTGTATTGCTGT	A // G	0.686
Affx-961055538	2	43414692	Subspecies	TGTCTTTGATACTACAGATTCTGTACTTCAGGAAG[C/T]AGCAGCCAGGATCTCTGGACTTCAAATCCAAAGTT	T // C	0.678
Affx-961055539	2	43417493	Subspecies	GATGGCTTTTGTAGCCTCTTCTCTTCCCAGAAATC[A/G]AGTTTAAAGTACCTCTCTACAACACAAAAGTGGCC	A // G	0.768
Affx-961055540	2	43424996	Subspecies	AAAGAAGCCCATTTTGAAAATCCAAACATGTTTTA[A/G]AGGAGGAAAAATCACTGAAGTTAAGCTAAGCTATT	A // G	0.71
Affx-961055542	2	43429928	Subspecies	AATTAAATAGTAGTATAGATGATATGAGGGCTTCC[C/T]TATTGGCTCAATGGTAAAGAATCCACCTGCCAATT	T // C	0.724
Affx-961055544	2	43441333	Subspecies	TCCATTACCTAAGATAACCTAAGAGAATGTCCAAC[A/G]TAGTAGGAATTAAGAAACTGTAGCAGGTTGGTGGG	A // G	0.756
Affx-961055545	2	43455873	Subspecies	TAAGGGCAGAAAGTTAATTTTTCTCTGGCATAATC[A/G]CTTCTGGTGACGGCTTTGGAATTTCTTAATATGAA	A // G	0.666
Affx-961194738	2	44126452	Parentage	TGAGGCCTGCATCTGTGCTTTCTGTTCACTGTTCT[C/T]TTTATCCTGTACCAATACCACATTCTATTCCTATG	T // C	0.772
Affx-961194741	2	44139554	Parentage	GTAAGAGCTGTCTGGTCTTTTTACAGCCATGAATC[A/G]ATTTCTTCTTGGAATAATTGTGCAGGTGCTCAACC	A // G	0.734
Affx-961055558	2	44153667	Subspecies	TATATTTTAAATCCTTTGAGAGTTAATGTGCATAG[A/G]TACATATAAGGCATAAAGTAAGCTATGCTTGACCA	A // G	0.73
Affx-961055559	2	44164510	Subspecies	AAATTTTCACAGATGTTCAGAATGAGAGTAATTAG[A/G]CCCTTTTCTTTATAATAATAGTGCCCTCTTTTGCT	A // G	0.744
Affx-961055560	2	44166955	Subspecies	AAAGCACTGAAACCTTTAAGTACTTTCTGTCTGCT[A/C]TTTTTTTTCAGTTTCCCACATACCATTGTTTAAAA	A // C	0.604
Affx-961055561	2	44169589	Subspecies	ACTTACATCAGTTTTAGTAAGTAGAGGACTCAGTT[A/C]TAGGGATTTGATTTAGTTTCTTTTGAAGATTAAAG	A // C	0.626
Affx-961055563	2	44180657	Subspecies	GTTTCAAGTCAATTGTGTAAATACTTAGGACCACA[A/G]CTGCTGGACTGTTGGTGTGTTTAACTTATTAACAA	A // G	0.732
Affx-961055565	2	44182154	Subspecies	AGTGGAATTGCTGGCTCATTTTATAACTTTATGTT[G/T]AAACACTTGAGTAGATGCCAGACTGGTTTTCAAAG	T // G	0.736
Affx-961055566	2	44197502	Subspecies	CCAGGAGTCTTCAGGGGTTGTCATCGCTCGTCCGG[C/T]GCTCGTGATCATGGTTTGACTTACTGCCTGCAGGT	T // C	0.656
Affx-961055570	2	44213933	Subspecies	GCACAGATATTAATAGCTTCCTCTTAATAAGAGTT[A/C]CTGAAAATTCATGGTTTGTATCAAAATAATGATAG	A // C	0.68
Affx-961055571	2	44215358	Subspecies	TCCCTGTAACTTCTGCTGTGGGACCATTTTTCTAG[A/G]AGGCTGAGGTCTTGACCCACATTAAAGCACTCCTG	A // G	0.688
Affx-961055572	2	44218317	Subspecies	GTGTTGAGTATCTGGCCCAGAAAGGTAAATAAGGA[C/T]CAGCCCTCAAGGGCAATTCCTTCTGCTGGTCCTGA	T // C	0.664
Affx-961055575	2	44264920	Subspecies	GCAACGGAAATACTTGTAACACTGGAAGTTATGGT[C/T]ACAAGGATTATTTCTGGGGCCATGTGTCGTCTCTG	T // C	0.716
Affx-961055576	2	44284237	Parentage	AATGAGTTATACACATAGATACATCCACTCTTTTA[A/G]GTTCTTTCCCCATGTAGGCCATGAGAGAGTATTGA	A // G	0.652
Affx-961055578	2	44355214	Subspecies	TAATTCGGCTTTTATAGGTAAGCTTAAGTTGACGT[A/C]ACCCTCCACTTTCAGGTCATTTCAGAACTTAGTTT	A // C	0.704
Affx-961055588	2	44995342	Subspecies	GGATTCTTTACCTGAGTCACCAGGGAAGCTCTCCC[C/T]TTTACTTTGAATTGTGGAATCTATTTCAAGGAGGT	T // C	0.702
Affx-961055591	2	45049433	Subspecies	AGAACAGGTGGGTTCCTCTGCCTGGAGGGGGACCA[A/C]AAATATTGTGGAATTACAGTAGCTGATCTTCTGTC	A // C	0.678
Affx-961055594	2	45285077	Parentage	GTCATCTTTCACAGCCCTTCAATTTAAAAAGATCA[A/G]GCTAGTGATTTTATTTCTATTTATAATACAAATCA	A // G	0.66
Affx-961055602	2	45641164	Subspecies	TCCATACCCAACCAATCAGGAAACCTAATTATCCC[G/T]AATGAAAGTCTATCAAACCAATCCAAGGGTATCTG	T // G	0.706
Affx-961055610	2	45844914	Subspecies	AGGGTGCAAGTCACAGCAACAGTGCAGTTACATGG[C/T]ATTCACTGTATTCCTGGTTTGGTTCTCAGACTTTC	T // C	0.686
Affx-961055613	2	45940785	Subspecies	TAGAGCCTCATAATAAAATAAATACTCTGTTAATC[C/T]AACAAAATTTGTCCCCTTTGGAATATGATCATTGA	T // C	0.642
Affx-961055614	2	45942152	Subspecies	GTGGATAAGGAGGATAGTTTCCCATTTTCTATGGA[C/T]ACAAGATGTGCAGATCTCAAAAGGATACCTCACAA	T // C	0.696
Affx-961055615	2	45945744	Subspecies	CTGCTTTTCCAAAACTCCATGAGAGACATGGTTTC[A/G]TTTCACATGGTATGAAAAATCAATAAGCAAGGAGT	A // G	0.75
Affx-961055616	2	45945802	Subspecies	ATAAGCAAGGAGTGATTTCACTCATTTAAGGGCAG[C/G]ATGACTAAAATTGGCTGTGGAGAGCCCACAGATGG	C // G	0.66
Affx-961055617	2	45945994	Subspecies	ACATCAAATATTTGACTTCTATGTAGTAAATGGGA[G/T]AAAGTGAAAGTGAAAGTTGCTCAGTTGTGTCCAAC	T // G	0.716
Affx-961055619	2	45946327	Subspecies	GGCTCCACCCCATCCCTCCACATCCACTCTCATCC[G/T]GACTATTAAATGTATTGCTTCAACTCTCAGTACCT	T // G	0.706
Affx-961055620	2	45946489	Subspecies	CTAGTAAGAGGCTTAAGGAAGTGATGTTCAAACTC[A/C]TTTGGTCAGATAAAGGGAAACAACAGAAAATGTAT	A // C	0.658
Affx-961055621	2	45947178	Subspecies	TCAGCCTTAAGGTGATGGCTATTTTTTGTTTTTAT[C/G]GTTGTATGCACTAAGAAAACTTGCTTGTACAAGTA	C // G	0.686
Affx-961055622	2	45947611	Subspecies	CTGTGCTATCTTCATCCAACCACACAGGCAAGAAA[A/C]TGTAAAAAACGGTGATAGTCCTGTTTGCACAAGAT	A // C	0.62
Affx-961055623	2	45947980	Subspecies	AGAGAAAAATTAAAATTGTTCAGTGTTCTGCCATA[A/G]AGCAAAGTTAGGATCAATGAACCAATCAACAGGAG	A // G	0.738
Affx-961055624	2	45949359	Subspecies	TCTTCTCCTCTCTGCATTCCTATAATTCCACTCCT[A/C]AGAAATAAGAATGATTAACTGCAATTAATCCTTAA	A // C	0.682
Affx-961055627	2	45952428	Subspecies	TCAATGTCAGTGTGAATTTATCAGTTGCCTTTTCT[A/G]TTGGAGTACTAAACTGCATAGATTCCTAAATATCA	A // G	0.74
Affx-961055632	2	45968140	Subspecies	ACTCTGGACCTATATTCTTTCTTAGCATCTTTCCT[C/T]TGGACACCAACCTCAGACTGGCAGGCAGTTTCTGA	T // C	0.6
Affx-961055634	2	45973188	Subspecies	ATATTACTCAGCCATAAAAAGAATGAAATTTTGCC[C/T]TTTGACAACATAGAAGGACCCAGGGAACATTATGC	T // C	0.646
Affx-961055635	2	45981002	Subspecies	GCCTGCCTGCCTGCCCAAGAAAGGAGAAAGCTTGC[C/T]ATAACCTCTACTACAAAGGCCAGTGAGGGAATAGA	T // C	0.68
Affx-961055636	2	45995918	Subspecies	TAAACTTATCCTCTGTAATACCTCATACTATATTT[C/T]AGGGGTCAGGTGCAAAGTAAATTGGTCAGGTGCCA	T // C	0.71
Affx-961055637	2	46011606	Subspecies	GTGCCAGGTTCACTTTTATGTAGAAATATGCAACA[C/T]GTCCTAAAATAAGTCAAACATGACAGCCTTGAACA	T // C	0.67
Affx-961194848	2	46017723	Parentage	TCCAGCTATCCACTATCCAATTTCTATGAGAAACA[A/G]TTTTATCAACTACGACACTTACATACTGTTCTTTT	A // G	0.78
Affx-961055641	2	46019486	Subspecies	TTTGCTTTATTTCACAAATTCTGATAACCTGTATC[C/T]TCACTTTTATTTAATTAAAAACATTTAAAAATATA	T // C	0.682
Affx-961055643	2	46020880	Subspecies	GTCTTTGCGATTGAATAGTTTTGGCTCTGATTACC[C/G]TTTCCTTTGTGTCTGTCCAGAAAGACAGTTGGAAA	C // G	0.672
Affx-961055644	2	46021542	Subspecies	CCTGTGAGGTGAATGTTGCATATTTCTCACATTTT[C/G]GTTACTGCTTTTAACAAAAGTGTCCATAATGAGGA	C // G	0.636
Affx-961055645	2	46024426	Subspecies	CAGTCTTACCATTACCAGCTGGATCTTGAACTGGA[G/T]CTTGTGCCAAATGTTTAATTTAAATAAGGATGTCT	T // G	0.708
Affx-961055647	2	46026482	Subspecies	TACATCTGGAGATGAAGGAAGGCAATAGAAACAAA[C/T]GGGTAGCCAAAACACCAAGTACTATAAACTAGAAT	T // C	0.688
Affx-961055648	2	46027165	Subspecies	ATGAATTGACAAATTCCTGATAGATTCAGACCTTT[A/C]TTATGGAGTAATGGCATTTTATCTTTATCATGACT	A // C	0.66
Affx-961055649	2	46048933	Subspecies	TAATTGCAGAAAGCAGGAACATTCACAGGAAATAC[A/G]GGCAAGAGCTCCATCATATAAGGATTTTGCAGAGC	A // G	0.69
Affx-961055651	2	46083615	Subspecies	ATGTGATTAACAATAGCTCAAAAAGAAAAACTATA[C/T]GCCCAAGAAAAGTAAAAGATGAGCCCTGGATTTAG	T // C	0.702
Affx-961194855	2	46086151	Parentage	ACAGACCATGCTTGTCTAACCACCCGGGAGTTTAG[C/T]TGGCTAATATATCTGATTCCCAAAGTGTTTGTCAC	T // C	0.766
Affx-961055653	2	46099929	Subspecies	AAATCTCTTTTCAGAATTATCCAAAGCACAAATGC[A/G]GAAAAATCAGAAAATATTGTGAGGTCATTCTTGAC	A // G	0.68
Affx-961055655	2	46122737	Subspecies	TCAACATTACATTTGAAAAATTCATTCAGTTTGTT[A/G]CATGTAGCTATAGTTCATGAATATTCACTGTAGGA	A // G	0.68
Affx-961055656	2	46122920	Subspecies	AGTTCCTGCATTTGTCCTCATGTGCAACAGTTTCT[C/T]TCCATTGCAGAGGTTATGCTCAAAGGCTGTGCACA	T // C	0.7
Affx-961055657	2	46139045	Subspecies	GAAGCACCTGAGTTTGCCGACCACTATACAGTTAG[A/G]AGGGGTTTTCCAGGTGGTGTTGGTAAAGAACCTGC	A // G	0.642
Affx-961055658	2	46148092	Subspecies	GTTTCTTTTGCTGTGCAAAACTTTACAGTTTAATT[A/G]GGTCCCATTTGTTTATTTTTGTTTTTATTTCCATT	A // G	0.6
Affx-961055660	2	46165630	Subspecies	ATCTTGTACAAAGCCCCTTAATTTGACTTTTTCTT[A/G]TAGTCTTTCTTGTAGTCTTTTTCCCATGATCAGAC	A // G	0.696
Affx-961055661	2	46196847	Subspecies	CCTAGTTCCTTGTCTAGTTGTTTACGTAGGAGCTA[C/T]GTCATACAGCTGGCAATATGTTTATTTGACATGCA	T // C	0.782
Affx-961055662	2	46199436	Subspecies	GAAGGAAATAATACCACCTACTTTGCAAAGTTGTT[G/T]CAGGCTGATAAACATATGTAGAACACCTAGAGCTC	T // G	0.628
Affx-961055666	2	46315093	Parentage	TTTGAAATATCACTGGAAATAATTAAATGCAGTTT[G/T]TATATCAGAAAGCCAAAGGCTCTGTCTTCCATTGT	T // G	0.68
Affx-961194866	2	46329152	Parentage	CCAGATCTCTCCTTTTGAAAGAAGCTGGAATTCAG[A/G]ATTTCTAATAAATCTCCTAATTCTCCATGTTGGCA	A // G	0.776
Affx-961055669	2	46398922	Subspecies	GCCTGTTTGTGAGGCTGCCTCCTGTTTGAATTGCC[C/G]CATAGTAAGACAGATGCTGGAAAGGGAAGTTCAAG	C // G	0.666
Affx-961055671	2	46444674	Subspecies	CCTAGAATTCAGAACATATTCTATCAACTAGCTGT[A/G]TGATCTTGAATATGACACTTAATTCCTCCCAGGTG	A // G	0.724
Affx-961055673	2	46481632	Subspecies	ACTCACCATTAGTCAGTTTAGAGGGTTTAATCAAA[A/G]CCCCTAATTTGTATTTGAAATTGTTGCTGCCATAT	A // G	0.774
Affx-961055674	2	46489443	Subspecies	TACAAAGATACTTTTAATACCCATTTTGTGATACA[A/G]GAATATTAGTAGTGTTCAAGATACATCAGGGGACG	A // G	0.722
Affx-961055676	2	46561218	Subspecies	CTGTCTGTAACTCAGCTTCCTTGCTTATAAAATGC[C/T]GACAACAGCACCCACATTCTAAGGTTAGTGTGTAT	T // C	0.708
Affx-961194908	2	46869350	Parentage	TCACTTATCAAAATCTACCTTGAATTGATATAATG[C/T]TGTTTTATGTATAAGAGCCTTAACAAAAGCAGTTT	T // C	0.742
Affx-961194929	2	47187070	Parentage	ATGATTTGGATCTATAAGGTGAACCAAACAACTTG[C/T]TCTGCTAATTAAGACTTATCTATCAGGAGATTTCA	T // C	0.756
Affx-961055694	2	47297415	Subspecies	AACTCAATAAGAAAACAAACAACCCAATAAAAATA[A/G]GTATTCAAAATTACCTTTGCATAACACTTCTATTT	A // G	0.736
Affx-961055695	2	47351570	Subspecies	AGAAAAAGATATTGAAATTGTAAAAAGAGATAACT[C/T]TGAAGAGGTGTTCCTTACATTTCTGGAAGGGCAGC	T // C	0.724
Affx-961055696	2	47352364	Subspecies	AACACGGAGTGGTCTATCAACCCTGAAAATTGGCA[A/G]CAGGTAAAAAGTACACTGGACAGGGCTGAATGCCT	A // G	0.618
Affx-961055701	2	47442760	Subspecies	ATATAAAAGTGGGGATTGATGGACCAAGCTTTGTC[C/T]GGAGGAGAGAAATCCTAGAGAGTGATTCGTGATAG	T // C	0.632
Affx-961055703	2	47452021	Subspecies	TCTGGCAAATACATGTGCATTTTGTTTGTAAAAAA[C/T]TTAAAAATGGGATAGTAAATTCATTTCCTACTGGG	T // C	0.636
Affx-961055707	2	47633736	Subspecies	ACTGACTGAATCCTATTACTCTGGGAATGGAGCCC[A/C]GTTGATTAGTGGCCCAGGTGATTCTGAAGCATGCC	A // C	0.664
Affx-961055717	2	47824242	Subspecies	GAATAATATATACCTGTAAAAGGAATTTTTATTTC[C/T]TAAGGAGATGAAAAATTACATGTTTCTTCATCCTA	T // C	0.716
Affx-961055718	2	47853850	Subspecies	ATGGGCAATTTTTATCTTAGGACTTTCATTATTAA[C/T]GTATTGATCTTACAACCTGCATACATATTATGTTT	T // C	0.742
Affx-961055723	2	48031177	Subspecies	AGGGATGAGGTGTGTATAGGGATGAGTATACAGAG[C/T]GCAGCAAAAGACTTTTTAGGGCAGTGAAAATACTC	T // C	0.696
Affx-961055726	2	48062294	Subspecies	TTAAAATGTAATTCTGAGAAAAGAATTTTTAGAAA[C/T]AGTCACTGAATAAAAGGGTAAAGAAATATCTCCCT	T // C	0.65
Affx-961055727	2	48087303	Subspecies	GGCAATAGCTAGGACATGGAAGCAACCTAGATGTC[C/T]ACTAACATATGAAGGGATAAATAAGTTGTGGTACA	T // C	0.674
Affx-961055732	2	48153745	Subspecies	TTATGCTACCTTCAGTTCTATTATCTGGGCATTCA[C/G]AAAAGCAGTCCCTTTGCTTGGAAACACTTCTCCTT	C // G	0.722
Affx-961194963	2	48184910	Parentage	ATGATTCCAGTCTACCTAATATGATACATTGTCAT[A/G]ATACCATTGTGTCTCTCATTTTTTTAAGATTCCCT	A // G	0.736
Affx-961055734	2	48216086	Subspecies	TGCTCTCTATCTAATTTGGGGGTGAAATACTATAA[A/G]TGAATATTATAAAGTAAAAATATACATAATATACT	A // G	0.738
Affx-961055736	2	48220414	Subspecies	TGTGACCTGCAGAAGATATGTCTAAAAATACAGAA[C/T]ACACTGAATTTTCATATACACTGATTTCATTGAAG	T // C	0.742
Affx-961055737	2	48222002	Subspecies	CTTGGCTATGAATTCAACAGACTGTTGTTAAACAG[G/T]TATTTTTGGCATTTACAATCTACAGTCCATATATT	T // G	0.778
Affx-961055738	2	48235567	Subspecies	TTTTAGTAAGTCAGCCCTTACAGAGACAGATTCAT[C/T]CAAAACAAGCCTTAGCAAAGCAATCAGCAAACTAA	T // C	0.676
Affx-961055739	2	48262778	Subspecies	TTTCATCAGCACTCAAGCACCCTGTGACTCTGATG[G/T]TTAAAGATCTCTCAAAAGCAAGGCATGAGAATTTG	T // G	0.676
Affx-961055740	2	48269856	Subspecies	TGATATTTTGGTCTTAGGAAAATTCAAGTAATTTA[C/T]CAATCTTTTTATAATGTTCTTAATACTTGGGGCAT	T // C	0.732
Affx-961055741	2	48271912	Subspecies	AAAAATAATTACGACTTTTTGGATGGAACAAAACA[C/G]AGAGTCATATTTGATAGAACTTGTTAAAATTGCTA	C // G	0.756
Affx-961055742	2	48277330	Subspecies	ACTAAGATAGTACTTTTTGTTTCTAAGAAATCATT[C/T]AACTAAGAACTCATTTTACTAAGGTACTAGAAACG	T // C	0.708
Affx-961055743	2	48297268	Subspecies	ATGTTGTTGTTGCTGTTTCTTAAACCAAATCATCA[A/G]AACTATAGTTGAAGAGCAGTTGTGTCTCATTGTGT	A // G	0.694
Affx-961055744	2	48302913	Subspecies	AAAAAAAGGGTCATGATCACTGTTTGGTGTTGTGC[G/T]GCCAGTCTGATTCACAACAGCTTCCTGAATCCTGG	T // G	0.674
Affx-961055745	2	48313596	Subspecies	AGGAAAACTAGCTGTTAAAAAAAGTAGACCAGTTA[A/G]GTTAAATCAAGTACTTAGCTAAATTTTAAAATATT	A // G	0.71
Affx-961055749	2	48396445	Subspecies	TACTTACATATGTAAAGTACCTCTATCTGACACAA[C/T]AGAACCATTCAATAAAATGTTAGCTATGGTCATTG	T // C	0.692
Affx-961055752	2	48460340	Subspecies	TTCAGAATGCTTACTATATACCAGATATCATTCAA[C/T]GCACTTTACTATGTTAACTCACCTACACTTTATAA	T // C	0.668
Affx-961055753	2	48464400	Subspecies	TTTATTCCCTAATTCAACACCCAAGCCAGGTATTA[C/T]GTATCTCTAAAGAACTAAGGAAGAGAATATCTTAA	T // C	0.698
Affx-961055755	2	48517757	Subspecies	ATTCTTATGGATTCTTTTGTTTTGTATTAAAAAAT[A/G]TGAGCTGTGCATGACCAATGGGTAACAGCTGCATG	A // G	0.754
Affx-961055756	2	48558738	Subspecies	AACTTATCCAAGCCTCTGGAGACTTCAAGAATACT[A/G]ACTTCAAAGGAAGTACATGCTATTACAAATACTAC	A // G	0.694
Affx-961055761	2	48751407	Subspecies	GACAAGCCATTGTAAACTTAAGTAGAGGTATTACA[C/T]AATTGAATTTAAGTAGCTGAAGACCACCCTTGCAA	T // C	0.674
Affx-961055763	2	48778569	Subspecies	GGCCAAAATCATAAAGATAATTGGTTAAAGTAACT[A/G]TATCATATGTGCCGTGCTAAGTTGCTTCAGTCGTG	A // G	0.69
Affx-961055764	2	48802231	Subspecies	GGAATCAGGAGGAAGCTTTCACTGTATTTGAGGCC[C/T]ATGAGAGAATTCATCCTCATGGTCTCTCTTGGTTA	T // C	0.64
Affx-961194979	2	48874360	Parentage	AGGAATTGGTTTAGAGACAGAAACCTTTTGAAGTT[A/C]ATTAGAGATTCTTGCTGTTTGAACTGTTTTACTAC	A // C	0.742
Affx-961055765	2	48875045	Subspecies	GATGTTTTTCTTTAGATAAAAGAGTGATTTTCAAA[C/T]AACCTAACACCTTGCTTTCTCTAGTCTAATAGCTG	T // C	0.66
Affx-961055767	2	48920586	Subspecies	GGTTGATCTCTCCTTGCTAAGAGACATCTAATTGA[C/T]GAGAACTTGTGTGAAGGCCTGAGAAGTTGAGAGAG	T // C	0.656
Affx-961055768	2	48920724	Subspecies	GAAACATCCTGCATCTTTGTAGGGTGCACCACCAC[C/G]AGTCAAGGCTTCTGATTTCCACTTCACTCTTTCTG	C // G	0.62
Affx-961055769	2	48920843	Subspecies	GCATGTAGCATAAGCAGATGACCTTTGGGGCCAGC[A/G]GAGTGAAATAGGATATATGTCAGAGGATTCCCCAA	A // G	0.69
Affx-961055770	2	48923055	Subspecies	TCATTCTGGCCTGAGTAATTAGGATGTTTTGTTGG[C/T]GTGGATCTCCTCAACCTGCCCAGAGCCATTTGTCC	T // C	0.642
Affx-961055771	2	48927518	Subspecies	CTTTTTATTTTGTATTGGGGTATAGCTGATTATAC[C/T]GTGGTGGCTTAAAAGGTAAAGAGTCTTACCTGCAA	T // C	0.612
Affx-961055773	2	48928076	Subspecies	GGGATATCATATGATATTTCTTCTTCTCTGACTTC[A/T]CTCAGTCATGTATATTATTACATTTTCTTTTTGCA	A // T	0.652
Affx-961055776	2	48929518	Subspecies	TAGAGTTTTAGCAGAAATGGAACATTATTTATGAT[C/G]AAAAGGAATGGGCTGGAAACTACAGCCAGAATATG	C // G	0.74
Affx-961055777	2	48929644	Subspecies	TCCAGGTCTATCTGGGCAATGATCTTTAAGTTCGT[A/G]TTGTTTAAATTGCAGGTCCTTACACAGCATTTTTT	A // G	0.74
Affx-961055780	2	48950240	Subspecies	TTCTAGTTTCATACTTTTGTGGTTGGAAAAGTTAA[G/T]TGATATAATTTCTCTCTTCTTGAATTTGTTGAAAC	T // G	0.734
Affx-961055781	2	48974951	Subspecies	TTTCTAGGTAAGAGGAAATAAATGAGTTTTCCACT[A/G]CAATTTACTTAGAGAGTTTAAAAATTGCACTACAG	A // G	0.664
Affx-961055782	2	48981747	Subspecies	TCATAGAGTTGATCCATGAGATGGGATTTGCTGTA[A/C]AGGATTAGTTGATCTGACTTTCCCTCCACAGAGCC	A // C	0.692
Affx-961055783	2	48982472	Subspecies	GCCTAAAAATCTTGACCTACAGAAGTGTCTACTCA[C/T]GGTAGAGTTAATTTACTTTGCTAAATCTCAATTTC	T // C	0.752
Affx-961055784	2	48984984	Subspecies	AAATAAAGGAGTATACACAGAGATCATGTAGGACA[C/T]TTTTGAAGTAATCCTGGTAAGAAATGGTAAAGATA	T // C	0.754
Affx-961055785	2	48986078	Subspecies	TATGGGGAGGAGAGGGGTCTGGGACTTAGGATGCA[A/G]TCTGTTATGAATATTCAACTGACATGCAGGTGTTA	A // G	0.662
Affx-961055787	2	49268558	Subspecies	TCTCCCCCTCAGGGCTTCTTAAATATGCTTTGATT[G/T]ATCAGCTTTTGGTACAGTGAATTTTACAAAACACC	T // G	0.67
Affx-961055789	2	49313704	Subspecies	CCTATATTTGCTTGCTTTCCTGGTGCTTACAACTG[C/T]TAGTGTACTATATCATTTAGTTTTTAGTCATGTGT	T // C	0.74
Affx-961055792	2	49397835	Subspecies	TGAACTTGCTTTAGTGTGAAGAAAAATTTTTTGTG[A/G]AGGATTTTATTATCAGAGTATCAGTAGAGAGAAAG	A // G	0.758
Affx-961055798	2	49473138	Subspecies	TAGCAGGCAAGAGGATGAGAGGCAGGAACAACCAT[A/G]TGGATGGAAAACCTCAATATCTAAGGTAATTTAAT	A // G	0.706
Affx-961055800	2	49508383	Subspecies	TTGAACTCAGTTTCTTGTTTGTTTTTAATATCTCC[C/T]GATATTTGCTTTCATGGCTTATTCTATATCATTTA	T // C	0.674
Affx-961055801	2	49518331	Subspecies	ATTGGAACCAATATGGAGTTTCTTATCTTATGGCC[A/G]TTGTGGTGTGGTGGTAGACCAGCATTTCATCTTGC	A // G	0.644
Affx-961055807	2	49693463	Subspecies	TCTTAAAGACTCAAAAATAAAAGAGCTGAAACACC[C/T]AAATATCACTTTATCATGAAATAATTTAGTACACT	T // C	0.628
Affx-961055808	2	49760039	Subspecies	GACTATGTAGTCCATGGGGTCAAAAAGAGTCAGAC[A/G]CTACTGAGTGACTTTTTTCTAAAGGGCTTTGCTGA	A // G	0.66
Affx-961055809	2	49760318	Subspecies	AAACTTACAATATTTTAAAACACACCAAGTGAAAA[G/T]CTCAATGAATATTGAATGGATTTTATCAATATGCT	T // G	0.694
Affx-961055810	2	49760588	Subspecies	AATCAGTGATTGGAATAAACTGAATCAAGAATTGT[A/G]TCTCATTAAAGTGTTAAAAATATTTTCACAAATAA	A // G	0.698
Affx-961055811	2	49760834	Subspecies	ATTATTAGAATAATAATTTATGATTAAGTTATCTG[A/G]TAAATAAGTAAATATCCATAACTAGAAAAAGTCTG	A // G	0.656
Affx-961055812	2	49761206	Subspecies	TCCCCCATAGTTTTGTCAGAGCCAAAAGTACCTGG[A/G]TTGACTGTACTACAAGGTACCTACATTTCTTCTCA	A // G	0.778
Affx-961055813	2	49762381	Subspecies	TAGAAAATTTTCATTCCAGTTTTCAAGGTTATTAA[A/G]TGTAAATAAAAAGCCTCTGAGAACAATAATTGATT	A // G	0.752
Affx-961055814	2	49763170	Subspecies	CTGTATTTGGGGATTATATACTAATTCCTTTGGCA[A/C]TAATAGTTAAATTGATACAGTATTTTCACAAGAAA	A // C	0.732
Affx-961055817	2	49767230	Subspecies	CTATGGACATAGTTACCCTCATGGGTAAAAAATCC[A/G]TTTCCCTTGAACCTGATTTTGATTCAAATGGAATT	A // G	0.716
Affx-961055818	2	49767720	Subspecies	GAAAATTTGATTATCAGTACTTGAACTTGCTTATG[A/G]CTTTTGAGATGTAGAGAAGAAGGTGAGTAGACTGG	A // G	0.638
Affx-961055819	2	49768024	Subspecies	AGAACAGCACATAGGGATCTTTATGACTCCAATTT[G/T]CCAGCACTATTATTTTAGTTATGATGATGTGGGCA	T // G	0.722
Affx-961055821	2	49771192	Subspecies	TACTTCCAGCATTTTAATGGATATCTGTCTACAAA[A/T]AAAGTTGCTGTTGAGATTCAGCTTTGTACTGAAGA	A // T	0.67
Affx-961055823	2	49777432	Subspecies	TGTAAATATATATTTTAAATCATTCCCTTTATTTC[C/T]AAGTAATTGATGTAATGAAAATATGTAACTATTAA	T // C	0.66
Affx-961055825	2	49784258	Subspecies	TGTCCCTTGAAGTCTAAGGCCATATTTTGACCTTC[C/T]CTGTGGCTTTACTCAGTGCCCAATAAACAGTGTTA	T // C	0.686
Affx-961055827	2	49787665	Subspecies	TACATATAGACTTTGTACATTTCCAGCCAGATTTA[C/T]CTCTGCATATGTTATAATTTTTAATCTATTGTAAT	T // C	0.71
Affx-961055828	2	49787804	Subspecies	TTATTTCTCTTTGTTATTGCATTGGTTAGAAATTC[C/T]ACTAGAATGTTGAAAAGTAGTGATGGTAGACATCA	T // C	0.688
Affx-961055829	2	49788818	Subspecies	GTGTACTATTAGCTCTCAGTTTTTATAAATGCCCT[A/C]TATCAATTTGAAGAAGTTTCCTTTTATTCCTAATA	A // C	0.766
Affx-961055834	2	49928033	Parentage	ACTGTATAGAGCTTCTCCATCTTCAGCTGCAAAGA[A/C]TATATTGATTTCTGATTTCAGAATTGACCATCTGG	A // C	0.66
Affx-961055836	2	49950710	Subspecies	ATACTTAAGTGCTGGCTAGAGTAGAAGACAGGAAT[C/T]TGTCCAACCTTGAATGTGTCTGAATCAGAATCTGA	T // C	0.668
Affx-961055839	2	50070536	Subspecies	TCTTGGTTCATGTAATCCTGAAGCCTAACATGCAA[G/T]ATTTTAAGTATAACCTTATTAGCAAGGGAGATGAG	T // G	0.702
Affx-961055841	2	50089046	Subspecies	CCGTCTAACTGCAGCATTTTTTTGGATGGGAAAAG[A/G]AAAAGCATTTCACATACTCCAAGAAAAAGTAGTGA	A // G	0.694
Affx-961055842	2	50099855	Subspecies	TATGAACTGTAAGTCAAGCATCCAACTCTCAACTG[C/T]GTATAGCAGACATACTAAGATTCAGAGATACAAAT	T // C	0.742
Affx-961055843	2	50110003	Subspecies	ATTTAGCTCTTCTCTCCATACCCTGATTTAGTAAA[C/T]AATTTATATTTTATTCCATAAAGCTGAACAAAGCC	T // C	0.634
Affx-961055844	2	50128389	Subspecies	ATATACATTTAAAATCCCTATCAAGTTGACTCTTA[A/C]ATATTAATAGGTGTGCCTATGAAATAGCAATGATT	A // C	0.756
Affx-961055845	2	50166657	Subspecies	CCTTTTTGGCATAAACACAGTATCTTTCATGATTT[C/T]CTTATTTGGTTCTGTCGTAAATACTTTGAAGTCAC	T // C	0.754
Affx-961055848	2	50221297	Subspecies	CCCATTTATGATAAACATCCTCCAGAAAGTAGACA[A/C]ACAAGGAAGGAACATACCTCAACTCAATAAAGGCC	A // C	0.692
Affx-961055853	2	50308721	Subspecies	TCTGTGAAAACTTTCTAAAAATAATTTGATAGAAA[C/T]TGGAGAGTTAGAAATACCTGATGTAATTATCTTTT	T // C	0.73
Affx-961055855	2	50320373	Subspecies	TTTCAAACAGAAACAAAAGGCATCAGAAAGCCAGT[A/C]TCAAAATAACATCCTAGCCAGGATTATGTATGTAC	A // C	0.676
Affx-961055858	2	50362501	Subspecies	GCAAGAGTACTGGAGTGGGGTGCCATTGCCTTCTC[C/T]GTGTGAAGTACTAACAAGTATTATTTGTTAAATAT	T // C	0.652
Affx-961055859	2	50368750	Subspecies	TACCATCTGTGGAAGTGCCCAATGTGAAGACTTTC[C/T]GCTGAAGAAATAAATAAAGCATTTTCATCTTTTCC	T // C	0.686
Affx-961055862	2	50449229	Subspecies	TATATACTGGAAGTGACTACTAGACTGAAGGGATT[A/C]GATCTGGCAGACACAGTGCCTGAAGAATTATGGAC	A // C	0.682
Affx-961055864	2	50485431	Subspecies	CTCTCCTAACAACACAAGAGAAGACTCTACACATG[C/G]ACATCACCAGAACAGCTAAGAGGACACTTAAAAGA	C // G	0.614
Affx-961055868	2	50640782	Subspecies	GTCAGAAGCCTTCCACTAAACCATAAGTTTCTTGA[A/G]GGCAAGAAATATGATGAATTCACCTGCATTCTCTA	A // G	0.65
Affx-961055874	2	50991656	Subspecies	GTAGAGAAGTATGGTGACTTGCTCAAAATTACACA[A/C]TTGTTTATGAAAGAACCATTATTGTTAAAGCATTT	A // C	0.786
Affx-961055878	2	51131985	Subspecies	AGGACATTATCAAGAGAACAGTTGTAATGAATATG[C/T]GAATGTGTGAAGCAATTCTCTTAGAATTTCTGTAT	T // C	0.684
Affx-961055882	2	51210927	Subspecies	TAATTTTATTTAAAGCTATAAGTAAGGCTTTTACA[C/T]GGAGAAGGCAGTGGCACCCCACTCCAGTACTCTTG	T // C	0.756
Affx-961055884	2	51237430	Subspecies	TCTACTTCAAATGTATGCCACTTAAAATGAACTGA[C/T]GGCCCCTCTGGTATGTGCTTCTACTTATTCCCCTT	T // C	0.71
Affx-961055887	2	51281140	Subspecies	TCTTATAGGTCTTCATAGAATGGATCAACTTCTTT[A/G]GCACTAGTGTTTGGGTCATAAACTTAGATTACTGT	A // G	0.71
Affx-961055895	2	51464673	Subspecies	ATATTATTCTTAAAAGGCCATAAAAATTAAAATAC[A/G]CTTCAAATATATATTAAATATTTGTAAATGAATGA	A // G	0.672
Affx-961055897	2	51477097	Subspecies	GAAACCTACCGGGGGAAGTTCTACCTATCTACAGT[A/G]GCAGGATCTCAGGGGACAACTTAGAAAGGACCACT	A // G	0.638
Affx-961055903	2	51633119	Subspecies	TATAATCTGGCCCAAATCTACATTTCCAGCCTCTC[C/T]ACTCATTGATCCTTCTCACACCCACTACACTCCAA	T // C	0.714
Affx-961055904	2	51650987	Subspecies	AAGAGTCGGACACGACTGAAGAGACTTAGCATGCC[C/G]GTGTTCTTAAATGTGGATTTGTAGACATTTAAAAA	C // G	0.716
Affx-961055910	2	51657411	Subspecies	TTTATATCTGTTGTTTAAAGTGACCAAATCCTATA[C/T]CCATGGAAGTGCTACCCACTCCCAAGAAGACACCC	T // C	0.776
Affx-961055911	2	51657639	Subspecies	AATGTGTATTCTTCCTCCTTCAAGATAATTACTGT[A/G]CTGAACAGAAGATACTCAATAAATATTTTATTTAT	A // G	0.642
Affx-961055912	2	51658201	Subspecies	GCAAGAGGTATCATAAGATGCACTTTTTCAGAAGA[C/T]GATTCTGCCTGCACAGTGAATAATGGATTAGAAAG	T // C	0.702
Affx-961055913	2	51658368	Subspecies	ACATGGAAATAAGGAGACAAAGTTCAGAGACAAAG[A/G]GATCAAAAATAATATGCAGGCAGCCAGCCTGAACA	A // G	0.674
Affx-961055914	2	51663306	Subspecies	ATTTTATAAAAATCCACCTCTAGCTATGGACACAC[C/T]GAAGCATACCAGTTGAGTGCTTGCCTTAAGTCCAC	T // C	0.698
Affx-961055915	2	51663576	Subspecies	AAATATTTTCAGCAACAGTATAGTAGAATACAAAG[C/T]AACTTTGGAATCATTTTCACCACCATAACAACTTC	T // C	0.688
Affx-961055916	2	51664502	Subspecies	TAATCTTAAGTACCATCTTAAGTTACACCAGCTCA[C/T]CCATTTGGTAAAGAAATTCTATATGCAAAAATCAA	T // C	0.694
Affx-961055917	2	51664690	Subspecies	ATATAGAATATTAAGTCTCCATGGAATGCCCAACC[C/T]GAGAAAGATTTTCCCGTGGGTCTCTCAGGATAATT	T // C	0.698
Affx-961055918	2	51664763	Subspecies	ACAGCAATTTAGGAGAGAAAACGATATTTTTTATG[A/G]TCCTCAGGAGCTTTGGATGGGCAGAAGACCACCAA	A // G	0.708
Affx-961055919	2	51665266	Subspecies	CATCAATAAGGAAAGTGAGAAAAAAACAAATTAAT[A/G]ACAACATTATTATAATAGCTGACTGCTGCAAAGTT	A // G	0.668
Affx-961055920	2	51666082	Subspecies	GGTGTGACTGTGGACATTCTAGATGGTGGAGCCTG[C/T]TCTCTGGCCGTTATTAAACTCCAAAATATTCTTTA	T // C	0.662
Affx-961055921	2	51667679	Subspecies	TGTGACCTATTAGGGAGATCCTATGACTACTGGAC[C/T]GAGAAAGAAAAGCTCAGACCTCATTACCAAGGTTA	T // C	0.682
Affx-961055922	2	51667768	Subspecies	TGATGTAGTGGAACCAGCCAGCCATGGATTTCTGT[C/T]CTGCTACAGCTCTATAGTTGACTTAAAGAATACGA	T // C	0.766
Affx-961055923	2	51668992	Subspecies	TCTGCTTAACAACATGGTGGAATCCACTTGGGACC[C/T]CCCTCCCTTAATAATTCCAAACCCAGTAGTAAAAT	T // C	0.66
Affx-961055924	2	51669163	Subspecies	CTGAGGTTCTGGCTGAGGGCAAGAATATAAAAGGG[C/T]GAATCAAAGAAGCGCCCTCATGATTAGAGTCAAAA	T // C	0.636
Affx-961055925	2	51672236	Subspecies	AAAGTGCTCACCAATAGCACAGATGTCTAGTAGAT[A/T]TAAAAACAAATGCTTGGCAGTTGTTTAAAAATGGG	A // T	0.656
Affx-961055926	2	51672489	Subspecies	CTGTAAATATTTGGAAACTGTATATACATACATGA[A/G]CTTTTATGTAAATTTGACGTTCTTTGAACATCCAA	A // G	0.696
Affx-961055927	2	51674388	Subspecies	GCAGAAAGATGGGACATTACAGCAGCTAAAAAGGA[A/G]AGGTTTATTATTCTGCCTCTTCTTCCTTCTCACTG	A // G	0.69
Affx-961055928	2	51677166	Subspecies	TGTTATCTCCTCCACCAGAATTCTAAGCTCCCAGT[A/G]GTCAGAGACTTTATGTGTTTGCTTATCACTATCAT	A // G	0.666
Affx-961055929	2	51678515	Subspecies	TTAAGATCTATCCTACATGGGCACTTTACCAAAGA[C/T]GATCAACAGGTATAAGTATCAATGTACATTCAAGT	T // C	0.72
Affx-961055930	2	51685715	Subspecies	GTGAAACATTCTTAAGCGAAATAGAAGAAAAATAA[C/T]AGTAAAGATAAAAGCAGAAATTATTAAAGAGAAAG	T // C	0.74
Affx-961055931	2	51686381	Subspecies	ATAGGCTACAGACTCATGGGCTAACTTTCCTCAGC[A/C]GGTGATATTTAAGTTGAGATTTGAATGATGTAGGC	A // C	0.672
Affx-961055935	2	51714720	Subspecies	AGCTTTCATTTTCTACTCTCTATTTCTTATATGTC[A/G]CAATTCTTCTGGATACTTTTAAACATCCCTTCTCA	A // G	0.736
Affx-961055937	2	51740709	Subspecies	TGATGCAAGCTGTATAGTCTCCCTCTTTTTTTTAA[A/G]CATTTGAAGGATACATACTATATAGTCCATGGAAG	A // G	0.722
Affx-961055938	2	51744877	Subspecies	CTAAATTAATGATCAAGGCTATGAAATTTTATGAA[C/T]GATCAAACTATGAACCAAATCAAATGTGCTTCTCA	T // C	0.742
[truncated: 17,955 more rows]
